# Supplementary material for: Highly enantioselective [4+2] annulation via organocatalytic Mannich-reductive cyclization: one-pot synthesis of functionalized piperidines
Source: Royal Society of Chemistry journal article supplement (doi:10.1039/c3cc42431f), 2013-01-01
Supplement: c3cc42431f.pdf [file c3cc42431f.pdf]

## Supporting Information

# Highly Enantioselective [4+2] Annulation *via* Organocatalytic Mannich-reductive Cyclization: One-pot Synthesis of Functionalized Piperidines

Indresh Kumar,<sup>\*</sup> <sup>a</sup> Panduga Ramaraju,<sup>a</sup> Nisar A. Mir,<sup>a</sup> Deepika Singh,<sup>b</sup> Vivek K. Gupta<sup>c</sup> and Rajnikant<sup>c</sup>

<sup>a</sup> Department of Chemistry, Birla Institute of Technology and Science, Pilani 333 031, (Rajasthan) India

E-mail: *indresh.chemistry@gmail.com*, *indresh.kumar@bits-pilani.ac.in*

<sup>b</sup> Instrumental Division, IIIM-CSIR Lab, Jammu 180 001, India

<sup>c</sup> X-ray Crystallography Laboratory, Post-Graduate Department of Physics & Electronics, University of Jammu, Jammu 180 006, India

### Table of Contents

---

|                                                                                                       |         |
|-------------------------------------------------------------------------------------------------------|---------|
| General Experimental Methods.....                                                                     | S2      |
| General procedure for [4+2] annulation reaction.....                                                  | S2      |
| Plausible Mechanism of the reaction and preparation of functionalized (-)-anabasine.....              | S3      |
| Characterization data for compounds <b>7a-7x</b> , <b>8</b> .....                                     | S4-S14  |
| <sup>1</sup> H & <sup>13</sup> C NMR copies and HPLC Data for compounds <b>7a-7x</b> , <b>8</b> ..... | S15-S63 |
| Single Crystal X-ray and data for <b>7t</b> .....                                                     | S64-S67 |

### General Experimental Methods:

All reactions under standard conditions were monitored by thin-layer chromatography (TLC) on SiO<sub>2</sub> gel F-254 plates. The normal column chromatography was performed on silica gel (100-200 mesh) and Flash column chromatography was performed on silica gel (230-400 meshes) using the mixture of Hexane-EtOAc as eluting solvent. All reagents were of analytical grade and used without further purification. <sup>1</sup>H and <sup>13</sup>C NMR spectra were recorded in CDCl<sub>3</sub> solution and spectral data were reported in ppm relative to tetramethylsilane (TMS) as internal standard. High resolution mass spectra were recorded using quadrupole electrospray ionization (ESI) technique. HPLC was performed on Water-2998 Instrument using CHIRALPAK-IA and IB columns and *i*-PrOH/Hexane as solvent system.

### General procedure for the organocatalytic Mannich-intramolecular reductive cyclization cascade as [4+2] annulation reaction:

Glutaraldehyde solution **5** (25% in water, 0.30 mL, 0.9 mmol) was added to a mixture of preformed *N*-PMP aldimine **6** (0.3 mmol) and L-proline (6.9 mg, 0.06 mmol) in DMSO (3.0 mL) at 10 °C. The reaction mixture was further stirred at the same temperature until the imine was consumed as monitored by TLC. Once the imine is over, reaction was taken to 0 °C and cold water (2.0 mL), CH<sub>3</sub>CO<sub>2</sub>H (100 mol%, 18 μL) was added. To this reaction mixture NaBH<sub>4</sub> was added cautiously at 0 °C, further stirred for 3 h and allows it come to room temperature. The reaction was subsequently quenched with NaHCO<sub>3</sub> solution (20 % sol, 10 mL). The aqueous solution was extracted with ethyl acetate (2 x 10 mL) and combined organic extracts were washed with brine once, dried over anhydrous Na<sub>2</sub>SO<sub>4</sub> and concentrated in vacuum after filtration. The residue was purified by column chromatography on silica gel (Hexane: EtOAc) to afford *trans*-2,3-disubstituted piperidine **7** with 57-90% yields.

The enantiomeric excess (*ee*) of the products were determined by HPLC analysis using CHIRALPAK-IA and IB columns. The relative and absolute configuration was established through the comparison of optical rotation with known compound as well as by the single crystal X-ray of **7t**. The ORTP-diagram of X-ray structure chosen for refinement has C2-(*S*), and C3-(*S*) stereochemistry, as expected through the well documented *syn*-selective direct Mannich reaction catalyzed by L-proline.

### Procedure for the preparation of functionalized anabasine 8:

Compounds **7s** (0.045 g, 0.15 mmol) solution in CH<sub>3</sub>CN (2 mL) was added slowly to the stirred solution of Ceric Ammonium Nitrate (CAN, 0.208 g, 0.38 mmol) in distilled water (2.0 mL) at 0 °C. The total reaction mixture was further stirred at same temperature for about 3 h, till the reaction complete by TLC. The reaction was quenched by adding the NaHCO<sub>3</sub> solution to bring the pH 10 and extracted with EtOAc (5 x 4 mL). The combined organic layer was washed with brine solution, dried over Na<sub>2</sub>SO<sub>4</sub> and evaporated under reduced pressure. The crude material was passed through a small pad of column by eluting Hexane/acetone (70:30 to 40:60 ratio), to gave 0.023 g, 82% yield.

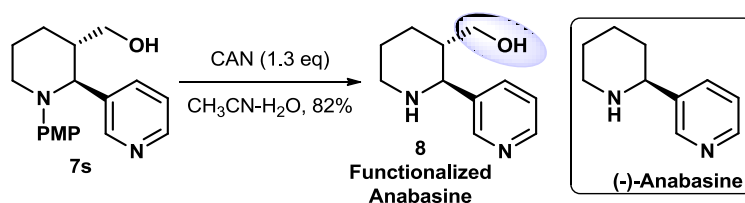

**Figure 1:** Plausible mechanism of the cascade [4+2] annulation reaction

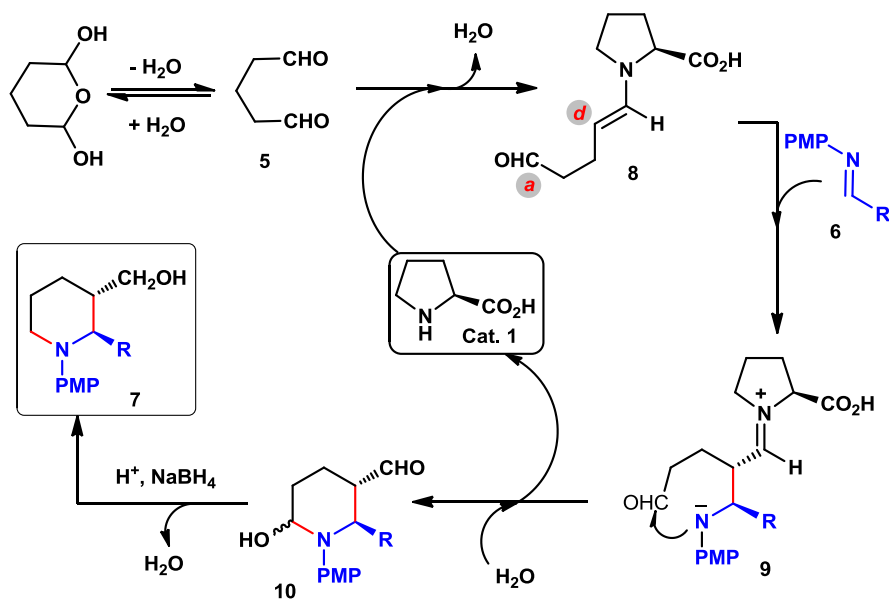

**((2*S*,3*S*)-1-(4-Methoxyphenyl)-2-(2-nitrophenyl)piperidin-3-yl)methanol (7a):**

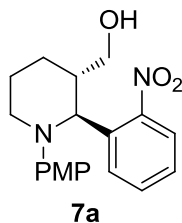

**7a:**  $^1\text{H}$  NMR (400 MHz,  $\text{CDCl}_3$ )  $\delta$  1.58-1.64 (m, 1H), 1.86-1.94 (m, 3H), 2.01-2.04 (m, 1H), 2.78 (dt,  $J = 3.5$  Hz, 11.6 Hz, 1H), 3.20 (d,  $J = 11.7$  Hz, 1H), 3.34-3.42 (m, 2H), 3.65 (s, 3H), 4.46 (d,  $J = 9.6$  Hz, 1H), 6.60 (d,  $J = 8.9$  Hz, 2H), 6.90 (d,  $J = 8.9$  Hz, 2H), 7.17 (t,  $J = 7.2$  Hz, 1H), 7.41 (t,  $J = 8.1$  Hz, 1H), 7.49 (d,  $J = 8.1$  Hz, 1H) 7.81 (d,  $J = 8.0$  Hz, 1H);  $^{13}\text{C}$ -NMR ( $\text{CDCl}_3$ )  $\delta$  25.81, 27.50, 47.22, 55.16, 57.85, 60.92, 64.43, 113.91 (2C), 123.26, 125.92 (2C), 127.46, 130.52, 132.49, 137.11, 145.56, 150.82, 156.15; HRMS (ESI): Calcd. for  $\text{C}_{19}\text{H}_{22}\text{N}_2\text{O}_4$  ( $\text{MH}^+$ ) 343.1658, Found 343.1649.

$[\alpha]_{\text{D}}^{25} = +41.2$  ( $c$  0.5,  $\text{CHCl}_3$ , >99% ee),

Enantiomeric excess was determined by HPLC with a Chiralpak-IA column ( $n$ -Hexane:  $i$ -PrOH = 90:10), 0.5 mL/min; minor enantiomer  $t_{\text{R}} = 18.108$  min, major enantiomer  $t_{\text{R}} = 19.477$  min.

**((2*S*, 3*S*)-1-(4-Methoxyphenyl)-2-(3-nitrophenyl)piperidin-3-yl)methanol (7b):**

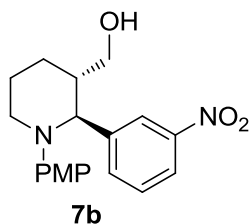

**7b:**  $^1\text{H}$  NMR (400 MHz,  $\text{CDCl}_3$ )  $\delta$  1.53-1.60 (m, 2H), 1.87-1.91 (m, 2H), 1.97-2.02 (m, 1H), 2.84 (dt,  $J = 3.6$  Hz, 11.2 Hz, 1H), 3.27 (dd,  $J = 5.0$  Hz, 10.7 Hz, 2H), 3.42 (dd,  $J = 3.5$  Hz, 10.7 Hz, 1H), 3.65 (s, 3H), 4.04 (d,  $J = 9.1$  Hz, 1H), 6.62 (d,  $J = 8.6$  Hz, 2H), 6.91 (d,  $J = 8.5$  Hz, 2H), 7.29 (t,  $J = 8.0$  Hz, 1H), 7.58 (d,  $J = 7.5$  Hz, 1H), 7.92 (d,  $J = 8.2$  Hz, 1H), 8.15 (s, 1H);  $^{13}\text{C}$ -NMR ( $\text{CDCl}_3$ )  $\delta$  25.48, 27.23, 45.86, 55.17, 56.94, 64.39, 66.11, 113.91 (2C), 121.83, 123.35, 125.57 (2C), 128.72, 134.78, 144.83, 145.39, 148.06, 155.68;

HRMS (ESI): Calcd for  $\text{C}_{19}\text{H}_{22}\text{N}_2\text{O}_4$  ( $\text{MH}^+$ ) 343.1658, Found 343.1657.

$[\alpha]_{\text{D}}^{25} = +8.7$  ( $c$  1.0,  $\text{CHCl}_3$ , >99% ee);

Enantiomeric excess was determined by HPLC with a Chiralpak IA column ( $n$ -Hexane:  $i$ -PrOH = 90:10), 0.5 mL/min; minor enantiomer  $t_{\text{R}} = 20.376$  min, major enantiomer  $t_{\text{R}} = 21.716$  min.

**((2*S*, 3*S*)-1-(4-Methoxyphenyl)-2-(4-nitrophenyl)piperidin-3-yl)methanol (7c):**

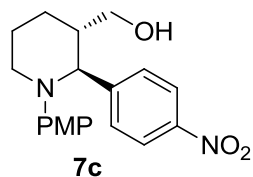

**7c:**  $^1\text{H}$  NMR (400 MHz,  $\text{CDCl}_3$ )  $\delta$  1.43-1.50 (m, 1H), 1.77-1.83 (m, 3H), 1.87-1.91 (m, 1H), 2.75 (dt,  $J = 3.5$  Hz, 11.6 Hz, 1H), 3.13-3.19 (m, 2H), 3.30 (dd,  $J = 3.5$  Hz, 10.7 Hz, 1H), 3.56 (s, 3H), 3.96 (d,  $J = 9.1$  Hz, 1H), 6.53 (d,  $J = 8.9$  Hz, 2H), 6.81 (d,  $J = 8.9$  Hz, 2H), 7.36 (d,  $J = 8.7$  Hz, 2H), 7.89 (d,  $J = 8.7$  Hz, 2H);  $^{13}\text{C}$ -NMR ( $\text{CDCl}_3$ )  $\delta$  25.38, 27.10, 45.79, 55.11, 56.79, 64.17, 66.08, 113.86 (2C), 123.08 (2C), 125.24 (2C), 129.26 (2C), 145.39, 146.51, 150.51, 155.58;

HRMS (ESI): Calcd for  $\text{C}_{19}\text{H}_{22}\text{N}_2\text{O}_4$  ( $\text{MH}^+$ ) 343.1659, Found 343.1659.

$[\alpha]_{\text{D}}^{25} = +18.2$  ( $c$  0.5,  $\text{CHCl}_3$ , 98% ee); Enantiomeric excess was determined by HPLC with a Chiralpak IA column ( $n$ -Hexane:  $i$ -PrOH = 90:10), 0.5 mL/min; minor enantiomer  $t_{\text{R}} = 25.343$  min, major enantiomer  $t_{\text{R}} = 35.604$  min.

**((2S, 3S)-2-(2-fluorophenyl)-1-(4-methoxyphenyl)piperidin-3-yl)methanol (7d):**

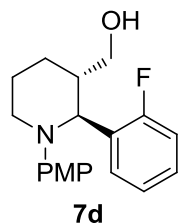

**7d:**  $^1\text{H}$  NMR (400 MHz,  $\text{CDCl}_3$ )  $\delta$  1.48-1.55 (m, 1H), 1.84-1.95 (m, 3H), 2.03-2.07 (m, 1H), 2.78 (dt,  $J = 3.3$  Hz, 11.6 Hz, 1H), 3.29-3.42 (m, 3H), 3.65 (s, 3H), 4.18 (d,  $J = 9.7$  Hz, 1H), 6.63 (d,  $J = 9.0$  Hz, 2H), 6.84 (t,  $J = 8.6$  Hz, 1H), 6.92 (m, 1H), 6.94 (d,  $J = 9.0$  Hz, 2H), 7.00-7.06 (m, 1H), 7.42 (dt, 1.7 Hz, 7.5 Hz, 1H);  $^{13}\text{C}$ -NMR ( $\text{CDCl}_3$ )  $\delta$  25.78, 27.64, 46.23, 55.11, 58.10, 58.39, 64.85, 113.68 (2C), 114.38, 114.57, 124.23, 125.17 (2C), 128.02, 129.43, 130.84, 148.99, 155.60;

HRMS (ESI): Calcd for  $\text{C}_{19}\text{H}_{22}\text{FNO}_2$  ( $\text{MH}^+$ ) 316.1714, Found 316.1715.

$[\alpha]_{\text{D}}^{25} = +33.20$  ( $c$  0.5,  $\text{CHCl}_3$ , 92% ee);

Enantiomeric excess was determined by HPLC with a Chiralpak IB column ( $n$ -Hexane:  $i$ -PrOH = 90:10), 0.5 mL/min; minor enantiomer  $t_{\text{R}} = 16.282$  min, major enantiomer  $t_{\text{R}} = 17.811$  min.

**((2S, 3S)-2-(3-fluorophenyl)-1-(4-methoxyphenyl)piperidin-3-yl)methanol (7e):**

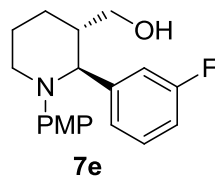

**7e:**  $^1\text{H}$  NMR (400 MHz,  $\text{CDCl}_3$ )  $\delta$  1.45 (m, 1H), 1.52 (bs, -OH, 1H), 1.83-1.87 (m, 3H), 1.94-1.99 (m, 1H), 2.83 (dt,  $J = 3.8$  Hz, 11.6 Hz, 1H), 3.22-3.30 (m, 2H), 3.42 (dd,  $J = 4.2$  Hz, 10.8 Hz, 1H), 3.66 (s,

3H), 3.87 (d,  $J = 8.9$  Hz, 1H), 6.63 (d,  $J = 8.9$  Hz, 2H), 6.73-6.77 (m, 1H), 6.90 (d,  $J = 8.9$  Hz, 2H), 6.99 (m, 2H), 7.01-7.11 (m, 1H);  $^{13}\text{C}$  NMR ( $\text{CDCl}_3$ );  $^{13}\text{C}$ -NMR (75 MHz,  $\text{CDCl}_3$ )  $\delta$  25.42, 27.22, 45.81, 55.22, 56.60, 65.81, 66.56, 113.51, 113.77 (2C), 115.07, 115.28, 124.25, 125.11 (2C), 129.24, 129.32, 145.82, 155.36;

HRMS (ESI): Calcd for  $\text{C}_{19}\text{H}_{22}\text{FNO}_2$  ( $\text{MH}^+$ ) 316.1714, Found 316.1710.

$[\alpha]_{\text{D}}^{25} = +11.10$  ( $c$  1.0,  $\text{CHCl}_3$ , 91% ee);

Enantiomeric excess was determined by HPLC with a Chiralpak IA column ( $n$ -Hexane:  $i$ -PrOH = 90:10), 0.5 mL/min; minor enantiomer  $t_{\text{R}} = 14.376$  min, major enantiomer  $t_{\text{R}} = 16.556$  min.

**((2S, 3S)-2-(4-fluorophenyl)-1-(4-methoxyphenyl)piperidin-3-yl)methanol (7f):**

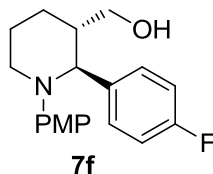

**7f:**  $^1\text{H}$  NMR (300 MHz,  $\text{CDCl}_3$ )  $\delta$  1.48-1.53 (m, 1H), 1.82-1.91 (m, 3H), 1.96-2.01 (m, 1H), 2.83 (dt,  $J = 3.7$  Hz, 11.5 Hz, 1H), 3.22-3.28 (m, 2H), 3.40 (dd,  $J = 4.1$  Hz, 10.8 Hz, 1H), 3.66 (s, 4H), 3.81 (d,  $J = 9.1$  Hz, 1H), 6.62 (d,  $J = 8.9$  Hz, 2H), 6.82 (t,  $J = 8.7$  Hz, 2H), 6.88 (d,  $J = 8.8$  Hz, 2H), 7.19 (dd,  $J = 5.7$  Hz, 8.6 Hz, 2H);  $^{13}\text{C}$  NMR (75 MHz,  $\text{CDCl}_3$ )  $\delta$  25.50, 27.38, 45.88, 55.14, 56.80, 64.84, 66.58, 113.64 (2C), 114.66, 114.83, 125.39 (2C), 129.80, 129.86, 137.81, 145.81, 155.36, 160.37;

HRMS (ESI): Calcd for  $\text{C}_{19}\text{H}_{22}\text{FNO}_2$  ( $\text{MH}^+$ ) 316.1714, Found 316.1721.

$[\alpha]_{\text{D}}^{25} = +9.1$  ( $c$  1.0,  $\text{CHCl}_3$ , 75% ee);

Enantiomeric excess was determined by HPLC with a Chiralpak IA column ( $n$ -Hexane:  $i$ -PrOH = 94:06), 0.5 mL/min; minor enantiomer  $t_{\text{R}} = 21.161$  min, major enantiomer  $t_{\text{R}} = 26.494$  min.

**((2S, 3S)-2-(2-chlorophenyl)-1-(4-methoxyphenyl)piperidin-3-yl)methanol (7g):**

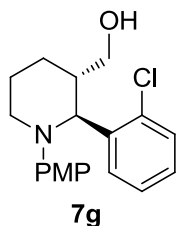

**7g:**  $^1\text{H}$  NMR (400 MHz,  $\text{CDCl}_3$ )  $\delta$  1.49-1.56 (m, 1H), 1.80-1.95 (m, 3H), 2.04-2.08 (m, 1H), 2.78 (dt,  $J = 3.3$  Hz, 11.6 Hz, 1H), 3.29-3.41 (m, 3H), 3.65 (s, 3H), 4.32 (d,  $J = 9.7$  Hz, 1H), 6.63 (d,  $J = 8.9$  Hz, 2H), 6.94-6.99 (m, 3H), 7.07 (t,  $J = 7.8$  Hz, 1H), 7.15 (d,  $J = 7.9$  Hz, 1H), 7.54 (dd,  $J = 1.6$  Hz, 7.8 Hz, 1H);  $^{13}\text{C}$  NMR (75 MHz,  $\text{CDCl}_3$ )  $\delta$  25.88, 27.67, 47.47, 55.13, 58.28, 61.92, 64.55, 113.67 (2C), 125.40 (2C), 127.05, 127.74, 128.60, 129.96, 133.74, 140.19, 145.96, 155.65;

HRMS (ESI): Calcd for  $\text{C}_{19}\text{H}_{22}\text{ClNO}_2$  ( $\text{MH}^+$ ) 332.1417, Found: 332.1419.

$[\alpha]_{\text{D}}^{25} = +74.00$  ( $c$  0.5,  $\text{CHCl}_3$ , 96% ee);

Enantiomeric excess was determined by HPLC with a Chiralpak IB column (*n*-Hexane: *i*-PrOH = 90:10), 0.5 mL/min; minor enantiomer  $t_R = 13.442$  min, major enantiomer  $t_R = 16.753$  min.

**((2*S*, 3*S*)-2-(3-chlorophenyl)-1-(4-methoxyphenyl)piperidin-3-yl)methanol (7h):**

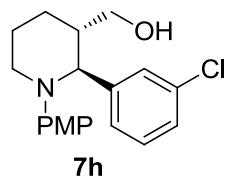

**7h:**  $^1\text{H NMR}$  (400 MHz,  $\text{CDCl}_3$ )  $\delta$  1.42-1.48 (m, 1H), 1.81-1.86 (m, 3H), 1.93-1.98 (m, 1H), 2.83 (dt,  $J = 4.0$  Hz, 11.7 Hz, 1H), 3.20-3.28 (m, 2H), 3.38 (dd,  $J = 4.0$  Hz, 10.8 Hz, 1H), 3.63 (s, 3H), 3.85 (d,  $J = 8.8$  Hz, 1H), 6.62 (d,  $J = 8.9$  Hz, 2H), 6.88 (d,  $J = 9.0$  Hz, 2H), 7.01-7.05 (m, 2H), 7.08-7.10 (m, 1H), 7.26 (s, 1H);  $^{13}\text{C NMR}$  (75 MHz,  $\text{CDCl}_3$ )  $\delta$  25.29, 27.08, 45.63, 55.10, 56.40, 64.56, 66.29, 113.74 (2C), 125.00 (2C), 126.72, 126.78, 128.34, 129.07, 133.78, 144.47, 145.66, 155.28;

HRMS (ESI): Calcd for  $\text{C}_{19}\text{H}_{22}\text{ClNO}_2$  ( $\text{MH}^+$ ) 332.1417, Found: 332.1415.

$[\alpha]_D^{25} = +6.0$  ( $c$  1.0,  $\text{CHCl}_3$ , 89% ee);

Enantiomeric excess was determined by HPLC with a Chiralpak IA column (*n*-Hexane: *i*-PrOH = 90:10), 0.5 mL/min; minor enantiomer  $t_R = 14.141$  min, major enantiomer  $t_R = 15.436$  min.

**((2*S*, 3*S*)-2-(4-chlorophenyl)-1-(4-methoxyphenyl)piperidin-3-yl)methanol (7i):**

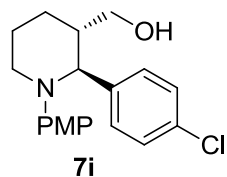

**7i:**  $^1\text{H NMR}$  (400 MHz,  $\text{CDCl}_3$ )  $\delta$  1.41-1.49 (m, 1H), 1.79-1.87 (m, 3H), 1.94-1.98 (m, 1H), 2.82 (dt,  $J = 3.4$  Hz, 10.4 Hz, 1H), 3.21-3.25 (m, 2H), 3.37 (dd,  $J = 4.0$  Hz, 10.7 Hz, 1H), 3.64 (s, 3H), 3.83 (d,  $J = 9.0$  Hz, 1H), 6.62 (d,  $J = 9.0$  Hz, 2H), 6.87 (d,  $J = 8.9$  Hz, 2H), 7.09 (d,  $J = 8.5$  Hz, 2H), 7.16 (d,  $J = 8.4$  Hz, 2H);  $^{13}\text{C NMR}$  (75 MHz,  $\text{CDCl}_3$ )  $\delta$  25.36, 27.19, 45.66, 55.05, 56.68, 64.56, 66.29, 113.67 (2C), 125.13 (2C), 128.02 (2C), 129.71 (2C), 131.97, 140.68, 145.64, 155.30;

HRMS (ESI): Calcd for  $\text{C}_{19}\text{H}_{22}\text{ClNO}_2$  ( $\text{MH}^+$ ) 332.1417, Found: 332.1416.

$[\alpha]_D^{25} = +10.4$  ( $c$  0.5,  $\text{CHCl}_3$ , 88% ee);

Enantiomeric excess was determined by HPLC with a Chiralpak IA column (*n*-Hexane: *i*-PrOH = 90:10), 0.5 mL/min; minor enantiomer  $t_R = 15.440$  min, major enantiomer  $t_R = 19.712$  min.

**((2*S*, 3*S*)-2-(2-bromophenyl)-1-(4-methoxyphenyl)piperidin-3-yl)methanol (7j):**

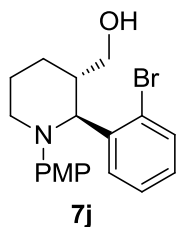

**7j:**  $^1\text{H}$  NMR (400 MHz,  $\text{CDCl}_3$ )  $\delta$  1.50-1.57 (m, 1H), 1.81-1.93 (m, 3H), 2.04-2.07 (m, 1H), 2.79 (dt,  $J = 3.3$  Hz, 11.7 Hz, 1H), 3.29 (d,  $J = 11.7$  Hz, 1H), 3.39 (d,  $J = 5.4$  Hz, 1H), 3.66 (s, 3H), 4.26 (d,  $J = 9.6$  Hz, 1H), 6.63 (d,  $J = 8.9$  Hz, 2H), 6.90 (dt,  $J = 1.7$  Hz, 7.5 Hz, 1H), 6.97 (d,  $J = 8.8$  Hz, 2H), 7.12 (t,  $J = 7.1$  Hz, 1H), 7.33 (dd,  $J = 1.1$  Hz, 8.0 Hz, 1H), 7.53 (dd,  $J = 1.7$  Hz, 7.9 Hz, 1H);  $^{13}\text{C}$ -NMR (75 MHz,  $\text{CDCl}_3$ )  $\delta$  25.89, 27.62, 47.73, 55.15, 58.17, 64.53, 64.75, 113.66 (2C), 124.81, 125.70 (2C), 127.63, 128.14, 130.43, 131.94, 141.78, 148.90, 155.73;

HRMS (ESI): Calcd for  $\text{C}_{19}\text{H}_{22}\text{BrNO}_2$  ( $\text{MH}^+$ ) 376.0912, Found 376.0914.

$[\alpha]_{\text{D}}^{25} = +61.0$  ( $c$  0.5,  $\text{CHCl}_3$ , 96% ee);

Enantiomeric excess was determined by HPLC with a Chiralpak IB column ( $n$ -Hexane:  $i$ -PrOH = 84:16), 0.5 mL/min; minor enantiomer  $t_{\text{R}} = 16.358$  min, major enantiomer  $t_{\text{R}} = 21.195$  min.

**((2S, 3S)-2-(3-bromophenyl)-1-(4-methoxyphenyl)piperidin-3-yl)methanol (7k):**

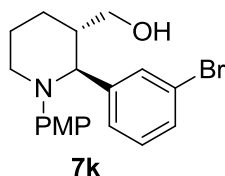

**7k:**  $^1\text{H}$  NMR (400 MHz,  $\text{CDCl}_3$ )  $\delta$  1.45-1.52 (m, 1H), 1.82-1.89 (m, 3H), 1.95-2.00 (m, 1H), 2.81-2.87 (dt,  $J = 3.3$  Hz, 11.6 Hz, 1H), 3.22-3.31 (m, 2H), 3.43 (dd,  $J = 4.0$  Hz, 10.8 Hz, 1H), 3.67 (s, 3H), 3.85 (d,  $J = 8.9$  Hz, 1H), 6.64 (d,  $J = 8.9$  Hz, 2H), 6.90 (d,  $J = 9.0$  Hz, 2H), 6.99 (t,  $J = 7.8$  Hz, 1H), 7.15 (d,  $J = 7.7$  Hz, 1H), 7.16-7.20 (m, 1H), 7.43 (t,  $J = 1.7$  Hz, 1H);  $^{13}\text{C}$  NMR (75 MHz,  $\text{CDCl}_3$ )  $\delta$  25.35, 27.14, 45.74, 55.21, 56.46, 64.74, 66.35, 113.82 (2C), 122.18, 125.07 (2C), 127.23, 129.45, 129.77, 131.31, 144.81, 145.71, 155.38;

HRMS (ESI): Calcd for  $\text{C}_{19}\text{H}_{22}\text{BrNO}_2$  ( $\text{MH}^+$ ) 376.0912, Found 376.0910.

$[\alpha]_{\text{D}}^{25} = -10.0$  ( $c$  0.5,  $\text{CHCl}_3$ , 97% ee);

Enantiomeric excess was determined by HPLC with a Chiralpak IA column ( $n$ -Hexane:  $i$ -PrOH = 90:10), 0.5 mL/min; minor enantiomer  $t_{\text{R}} = 14.346$  min, major enantiomer  $t_{\text{R}} = 15.340$  min.

**((2S, 3S)-2-(4-bromophenyl)-1-(4-methoxyphenyl)piperidin-3-yl)methanol (7l):**

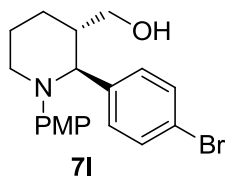



**7l:**  $^1\text{H}$  NMR (400 MHz,  $\text{CDCl}_3$ )  $\delta$  1.47-1.54 (m, 1H), 1.83-1.89 (m, 3H), 1.98-2.02 (m, 1H), 2.85 (dt,  $J = 4.0$  Hz, 10.4 Hz, 1H), 3.24-3.30 (m, 2H), 3.42 (dd,  $J = 4.0$  Hz, 10.8 Hz, 1H), 3.69 (s, 3H), 3.85 (d,  $J = 9.1$  Hz, 1H), 6.66 (d,  $J = 8.9$  Hz, 2H), 6.91 (d,  $J = 8.9$  Hz, 2H), 7.14 (d,  $J = 8.4$  Hz, 2H) 7.28 (d,  $J = 8.4$  Hz, 2H);  $^{13}\text{C}$  NMR (75 MHz,  $\text{CDCl}_3$ )  $\delta$  25.43, 27.25, 40.79, 55.18, 56.69, 64.76, 66.41, 113.78 (2C), 125.18 (2C), 128.52, 130.16 (2C), 131.06 (2C), 141.32, 145.75, 155.39;

HRMS (ESI): Calcd for  $\text{C}_{19}\text{H}_{22}\text{BrNO}_2$  ( $\text{MH}^+$ ) 376.0913, Found 376.0909.

$[\alpha]_{\text{D}}^{25} = -6.4$  ( $c$  1.0,  $\text{CHCl}_3$ , 90% ee);

Enantiomeric excess was determined by HPLC with a Chiralpak IA column ( $n$ -Hexane:  $i$ -PrOH = 90:10), 0.5 mL/min; minor enantiomer  $t_{\text{R}} = 16.002$  min, major enantiomer  $t_{\text{R}} = 21.944$  min.

**((2S, 3S)-2-(3-bromo-4-fluorophenyl)-1-(4-methoxyphenyl)piperidin-3-yl)methanol (7m):**

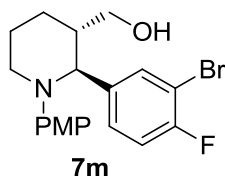

**7m:**  $^1\text{H}$  NMR (400 MHz,  $\text{CDCl}_3$ )  $\delta$  1.79-1.88 (m, 4H), 1.95-1.99 (m, 1H), 2.83 (dt,  $J = 4.1$  Hz, 11.6 Hz, 1H), 3.20-3.27 (m, 2H), 3.40 (dd,  $J = 3.8$  Hz, 10.7 Hz, 1H), 3.67 (s, 3H), 3.84 (d,  $J = 9.1$  Hz, 1H), 6.64 (d,  $J = 8.9$  Hz, 2H), 6.85 (m, 1H), 6.89 (d,  $J = 9.0$  Hz, 2H), 7.11-7.14 (m, 1H), 7.47 (dd,  $J = 2.1$  Hz, 6.7 Hz, 1H);  $^{13}\text{C}$  NMR (75 MHz,  $\text{CDCl}_3$ )  $\delta$  25.37, 27.15, 45.78, 55.17, 56.63, 64.46, 65.71, 113.85 (2C), 115.58, 115.80, 125.27 (2C), 128.90, 133.10, 139.82, 145.54, 155.53, 158.70;

HRMS (ESI): Calcd for  $\text{C}_{19}\text{H}_{21}\text{BrFNO}_2$  ( $\text{MH}^+$ ) 394.0818, Found 394.0821.

$[\alpha]_{\text{D}}^{25} = -6.2$  ( $c$  1.0,  $\text{CHCl}_3$ , 92% ee);

Enantiomeric excess was determined by HPLC with a Chiralpak IA column ( $n$ -Hexane:  $i$ -PrOH = 90:10), 0.5 mL/min; minor enantiomer  $t_{\text{R}} = 14.096$  min, major enantiomer  $t_{\text{R}} = 15.592$  min.

**4-((2S, 3S)-3-(hydroxymethyl)-1-(4-methoxyphenyl)piperidin-2-yl)benzotrile (7n):**

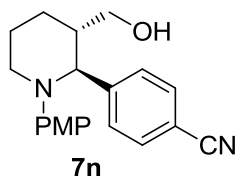

**7n:**  $^1\text{H}$  NMR (400 MHz,  $\text{CDCl}_3$ )  $\delta$  1.49- 1.56 (m, 1H), 1.80-1.86 (m, 3H), 1.94-1.98 (m, 1H), 2.82 (dt,  $J = 4.2$  Hz, 10.4 Hz, 1H), 3.19-3.25 (m, 2H), 3.35 (dd,  $J = 3.7$  Hz, 10.7 Hz, 1H), 3.64 (s, 3H), 3.97 (d,  $J = 9.1$  Hz, 1H), 6.61 (d,  $J = 9.0$  Hz, 2H), 6.87 (d,  $J = 9.0$ , 2H), 7.38 (q,  $J = 8.6$  Hz, 12.2 Hz, 4H);  $^{13}\text{C}$  NMR (75 MHz,  $\text{CDCl}_3$ )  $\delta$  25.31, 27.03, 45.61, 55.12, 56.59, 64.16, 66.27, 110.12, 113.81 (2C), 118.82, 125.11 (2C), 129.22 (2C), 131.66 (2C), 145.40, 148.27, 155.48;

HRMS (ESI): Calcd for  $\text{C}_{20}\text{H}_{22}\text{N}_2\text{O}_2$  ( $\text{MH}^+$ ) 323.1759, Found 323.1763.

$[\alpha]_{\text{D}}^{25} = +8.8$  ( $c$  1.0,  $\text{CHCl}_3$ , 97% ee);

Enantiomeric excess was determined by HPLC with a Chiralpak IA column (*n*-Hexane: *i*-PrOH = 90:10), 0.5 mL/min; minor enantiomer  $t_R = 24.835$  min, major enantiomer  $t_R = 34.001$  min.

**((2*S*, 3*S*)-1-(4-methoxyphenyl)-2-phenylpiperidin-3-yl)methanol (7o):**

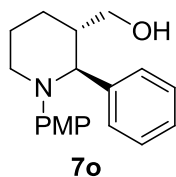

**7o:**  $^1\text{H}$  NMR (400 MHz,  $\text{CDCl}_3$ )  $\delta$  1.85-1.89 (m, 2H), 1.94-2.06 (m, 3H), 2.85 (dt,  $J = 3.5$  Hz, 11.7 Hz, 1H), 3.24-3.32 (m, 2H), 3.45 (dd,  $J = 4.4$  Hz, 11.0 Hz, 1H), 3.66 (s, 3H), 3.84 (d,  $J = 8.6$  Hz, 1H), 6.62 (d,  $J = 9.0$  Hz, 2H), 6.91 (d,  $J = 9.4$  Hz, 2H), 7.08 (d,  $J = 7.2$  Hz, 1H), 7.15 (t,  $J = 7.2$  Hz, 2H), 7.24 (d,  $J = 7.1$  Hz, 2H);  $^{13}\text{C}$  NMR (75 MHz,  $\text{CDCl}_3$ )  $\delta$  25.51, 27.42, 45.96, 55.18, 56.60, 65.27, 67.46, 113.66 (2C), 125.11 (2C), 126.72, 128.02 (2C), 128.47 (2C), 142.13, 146.05, 155.21;

HRMS (ESI): Calcd for  $\text{C}_{19}\text{H}_{23}\text{NO}_2$  ( $\text{MH}^+$ ) 298.1807, Found: 298.1811.

$[\alpha]_D^{25} = +2.6$  ( $c$  0.5,  $\text{CHCl}_3$ , 73% ee); Lit:  $[\alpha]_D^{25} +3.5$  ( $c$  0.2,  $\text{CHCl}_3$ ).<sup>Ref.</sup>

Enantiomeric excess was determined by HPLC with a Chiralpak IA column (*n*-Hexane: *i*-PrOH = 90:10), 1.0 mL/min; minor enantiomer  $t_R = 29.181$  min, major enantiomer  $t_R = 23.841$  min.

Ref.: R. M. de Figueiredo, R. Fröhlich, and M. Christmann, *J. Org. Chem.* 2006, **71**, 4147.

**((2*S*, 3*S*)-1-(4-methoxyphenyl)-2-(naphthalen-1-yl)piperidin-3-yl)methanol (7p):**

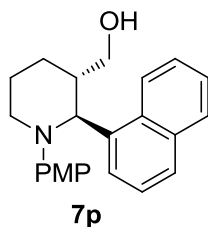

**7p:**  $^1\text{H}$  NMR (400 MHz,  $\text{CDCl}_3$ )  $\delta$  1.45-1.56 (m, 1H), 1.84-1.90 (m, 1H), 1.95-2.07 (m, 2H), 2.18-2.27 (m, 1H), 2.85-2.94 (m, 1H), 3.13 (dd,  $J = 5.4$  Hz, 5.6 Hz, 1H), 3.23 (dd, 4.3 Hz, 4.3 Hz, 1H), 3.38 (d,  $J = 12.7$  Hz, 1H), 3.51 (s, 3H), 4.50 (d,  $J = 9.2$  Hz, 1H), 6.45 (d,  $J = 9.0$  Hz, 2H), 6.90 (d,  $J = 8.9$  Hz, 2H), 7.23 (d,  $J = 7.7$  Hz, 1H), 7.37-7.51 (m, 4H), 7.55 (d,  $J = 8.2$  Hz, 1H), 7.72 (d,  $J = 8.2$  Hz, 1H);  $^{13}\text{C}$ -NMR (75 MHz,  $\text{CDCl}_3$ )  $\delta$  25.78, 27.82, 45.70, 55.00, 57.98, 63.53, 65.15, 113.47 (2C), 124.40, 124.97, 125.08, 125.16, 125.40, 126.96, 127.34, 128.70, 129.49, 131.81, 133.68, 138.10, 146.03, 155.19;

HRMS (ESI): Calcd for  $\text{C}_{23}\text{H}_{25}\text{NO}_2$  ( $\text{MH}^+$ ): 348.1963, Found 348.1967.

$[\alpha]_D^{25} = +34.4$  ( $c$  0.5,  $\text{CHCl}_3$ , 81% ee);

Enantiomeric excess was determined by HPLC with a Chiralpak IA column (*n*-Hexane: *i*-PrOH = 90:10), 0.5 mL/min; minor enantiomer  $t_R = 16.925$  min, major enantiomer  $t_R = 18.265$  min.

**((2S, 3S)-1-(4-methoxyphenyl)-2-(naphthalen-2-yl)piperidin-3-yl)methanol (7q):**

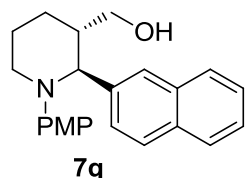

**7q:**  $^1\text{H NMR}$  (300 MHz,  $\text{CDCl}_3$ )  $\delta$  1.50-1.57 (m, 1H), 1.86-1.94 (m, 2H), 2.00-2.08 (m, 2H), 2.93 (dt,  $J = 3.4$  Hz, 11.6 Hz, 1H), 3.28-3.35 (m, 2H), 3.40 (dd,  $J = 4.1$  Hz, 10.9 Hz, 1H), 3.59 (s, 3H), 4.04 (d,  $J = 8.7$  Hz, 1H), 6.60 (d,  $J = 9.0$  Hz, 2H), 6.99 (d,  $J = 9.0$  Hz, 2H), 7.38-7.43 (m, 2H), 7.51 (dd,  $J = 6.9$  Hz, 8.4 Hz, 1H), 7.65-7.74 (m, 4H);  $^{13}\text{C-NMR}$  (75 MHz,  $\text{CDCl}_3$ )  $\delta$  25.47, 27.32, 45.63, 55.03, 56.70, 64.96, 67.22, 113.67 (2C), 125.06, 125.11, 125.31, 125.60, 126.37, 127.34, 127.44, 127.64, 127.69, 132.51, 133.03, 139.76, 145.94, 155.16;

HRMS (ESI): Calcd for  $\text{C}_{23}\text{H}_{25}\text{NO}_2$  ( $\text{MH}^+$ ): 348.1963, Found 348.1959.

$[\alpha]_{\text{D}}^{25} = +9.5$  ( $c$  1.0,  $\text{CHCl}_3$ , 94% ee);

Enantiomeric excess was determined by HPLC with a Chiralpak IA column ( $n$ -Hexane:  $i$ -PrOH = 90:10), 0.5 mL/min; minor enantiomer  $t_{\text{R}} = 18.405$  min, major enantiomer  $t_{\text{R}} = 23.997$  min.

**((2S, 3S)-1-(4-methoxyphenyl)-2-(pyridin-2-yl)piperidin-3-yl)methanol (7r):**

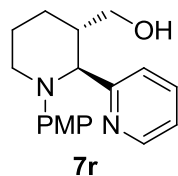

**7r:**  $^1\text{H NMR}$  (400 MHz,  $\text{CDCl}_3$ )  $\delta$  1.66-1.73 (m, 1H), 1.84-1.87 (m, 4H), 2.81-2.87 (m, 1H), 3.27 (dd,  $J = 4.4$  Hz, 11.6 Hz, 1H), 3.34-3.42 (m, 2H), 3.65 (s, 3H), 4.24 (d,  $J = 8.8$  Hz, 1H), 6.63 (d,  $J = 9.0$  Hz, 2H), 6.91 (d,  $J = 8.9$  Hz, 2H), 6.97-7.01 (m, 1H), 7.28 (d,  $J = 7.9$  Hz, 1H), 7.44 (dt,  $J = 1.6$  Hz, 7.7 Hz, 1H), 8.38 (d,  $J = 4.8$  Hz, 1H);  $^{13}\text{C-NMR}$  (75 MHz,  $\text{CDCl}_3$ )  $\delta$  25.40, 27.32, 45.74, 55.21, 56.40, 64.66, 67.30, 113.87 (2C), 121.68, 122.61, 123.91 (2C), 136.60, 146.04, 147.97, 154.88, 162.55;

HRMS (ESI): Calcd for  $\text{C}_{18}\text{H}_{22}\text{N}_2\text{O}_2$  ( $\text{MH}^+$ ) 299.1759, Found: 299.1757.

$[\alpha]_{\text{D}}^{25} = +32.4$  ( $c$  0.5,  $\text{CHCl}_3$ , 80% ee); Enantiomeric excess was determined by HPLC with a Chiralpak IA column ( $n$ -Hexane:  $i$ -PrOH = 85:15), 0.5 mL/min; major enantiomer  $t_{\text{R}} = 42.928$  min, minor enantiomer  $t_{\text{R}} = 48.704$  min.

**((2S, 3S)-1-(4-methoxyphenyl)-2-(pyridin-3-yl)piperidin-3-yl)methanol (7s):**

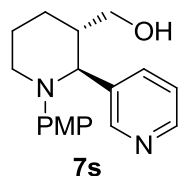

**7s:**  $^1\text{H}$  NMR (400 MHz,  $\text{CDCl}_3$ )  $\delta$  1.54-1.60 (m, 2H), 1.81-1.89 (m, 3H), 2.82 (dt,  $J = 4.0$  Hz, 10.4 Hz, 1H), 3.21-3.25 (m, 2H), 3.38 (dd,  $J = 3.6$  Hz, 11.7 Hz, 1H), 3.64 (s, 3H), 3.94 (d,  $J = 9.2$  Hz, 1H), 6.60 (d,  $J = 9.0$  Hz, 2H), 6.88 (d,  $J = 8.9$  Hz, 2H), 7.06 (dd,  $J = 4.8$  Hz, 11.8 Hz, 1H), 7.60 (d,  $J = 7.9$  Hz, 1H), 8.23 (dd,  $J = 1.6$  Hz, 4.7 Hz, 1H) 8.39 (s, 1H);  $^{13}\text{C}$ -NMR (75 MHz,  $\text{CDCl}_3$ )  $\delta$  25.54, 27.31, 40.80, 45.75, 55.18, 62.53, 64.33, 113.89 (2C), 123.26, 123.49, 125.53 (2C), 145.51, 148.26, 148.46, 149.82, 155.62; HRMS (ESI): Calcd for  $\text{C}_{18}\text{H}_{22}\text{N}_2\text{O}_2$  ( $\text{MH}^+$ ) 299.1759, Found: 299.1764.

$[\alpha]_{\text{D}}^{25} = +11.1$  ( $c$  1.0, MeOH, 81% ee);

Enantiomeric excess was determined by HPLC with a Chiral pak IA column ( $n$ -Hexane:  $i$ -PrOH = 90:10), 0.5 mL/min; major enantiomer  $t_{\text{R}} = 46.112$  min, minor enantiomer  $t_{\text{R}} = 52.412$  min.

**((2S, 3S)-1-(4-methoxyphenyl)-2-(pyridin-4-yl)piperidin-3-yl)methanol (7t):**

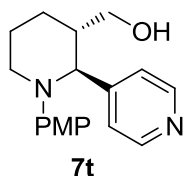

**7t:**  $^1\text{H}$  NMR (400 MHz,  $\text{CDCl}_3$ )  $\delta$  1.52-1.58 (m, 2H), 1.81-1.86 (m, 3H), 2.84-2.90 (m, 1H), 3.21-3.25 (m, 2H), 3.40 (dd,  $J = 3.9$  Hz, 10.7 Hz, 1H), 3.65 (s, 3H), 4.03 (d,  $J = 8.6$  Hz, 1H), 6.63 (d,  $J = 9.0$  Hz, 2H), 6.88 (d,  $J = 9.0$  Hz, 2H), 7.22 (d,  $J = 6.0$  Hz, 2H), 8.29 (d,  $J = 6.0$  Hz, 2H);  $^{13}\text{C}$ -NMR (75 MHz,  $\text{CDCl}_3$ )  $\delta$  24.82, 26.42, 40.37, 44.89, 55.61, 61.88, 64.76, 113.68 (2C), 123.80 (2C), 124.23 (2C), 145.29, 148.46 (2C), 152.30, 154.98;

HRMS (ESI): Calcd for  $\text{C}_{18}\text{H}_{22}\text{N}_2\text{O}_2$  ( $\text{MH}^+$ ) 299.1759, Found: 299.1762.

$[\alpha]_{\text{D}}^{25} = +12.4$  ( $c$  1.0,  $\text{CHCl}_3$ , 90% ee); Enantiomeric excess was determined by HPLC with a Chiralpak IA column ( $n$ -Hexane:  $i$ -PrOH = 85:15), 0.5 mL/min; minor enantiomer  $t_{\text{R}} = 16.558$  min, major enantiomer  $t_{\text{R}} = 18.641$  min.

**((2S, 3S)-1-(4-methoxyphenyl)-2-(thiophen-2-yl)piperidin-3-yl)methanol (7u):**

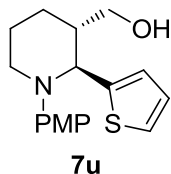

**7u:**  $^1\text{H}$  NMR (300 MHz,  $\text{CDCl}_3$ )  $\delta$  1.54-1.59 (m, 1H), 1.76-1.84 (m, 3H), 1.97-2.03 (m, 1H), 2.07-2.12 (m, 1H), 2.97-3.07 (m, 1H), 3.19-3.25 (m, 1H), 3.58 (dd,  $J = 5.2$  Hz, 10.6 Hz, 1H), 3.72 (s, 3H), 4.56 (d,  $J = 6.5$  Hz, 1H), 6.72 (d,  $J = 8.9$  Hz, 2H), 6.75 (d,  $J = 3.7$  Hz, 1H), 6.78 (dd, 3.5 Hz, 5.0 Hz, 1H), 6.95 (d,  $J = 8.9$  Hz, 2H), 7.09 (dd, 1.1 Hz,  $J = 5.0$  Hz, 1H);  $^{13}\text{C}$ -NMR (75 MHz,  $\text{CDCl}_3$ )  $\delta$  25.42, 28.91, 44.97, 51.93, 55.33, 61.44, 65.23, 113.96 (2C), 122.81 (2C), 124.20, 125.64, 125.83, 130.86, 145.57, 154.72;

HRMS (ESI): Calcd for  $\text{C}_{17}\text{H}_{21}\text{NO}_2\text{S}$  ( $\text{MH}^+$ ) 304.1371, Found. 304.1375.

$[\alpha]_D^{25} = -5.2$  ( $c$  1.0,  $\text{CHCl}_3$ , 80% ee); Enantiomeric excess was determined by HPLC with a Chiralpak IA column ( $n$ -Hexane:  $i$ -PrOH = 90:10), 0.5 mL/min; major enantiomer  $t_R = 19.560$  min, minor enantiomer  $t_R = 23.400$  min.

**((2S, 3S)-2-(fuyan-2-yl)-1-(4-methoxyphenyl)piperidin-3-yl)methanol (7v):**

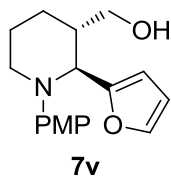

**7v:**  $^1\text{H}$  NMR (300 MHz,  $\text{CDCl}_3$ )  $\delta$  1.52-1.60 (m, 1H), 1.71-1.79 (m, 1H), 1.81-1.86 (m, 1H), 1.91-1.98 (m, 1H), 2.23-2.30 (m, 1H), 3.02-3.08 (m, 1H), 3.15-3.20 (m, 1H), 3.60 (dd,  $J = 5.3$  Hz, 10.7 Hz, 1H), 3.73 (s, 3H), 3.75 (dd,  $J = 6$  Hz, 10.7 Hz, 1H, ), 4.38 (d,  $J = 6.8$  Hz, 1H), 5.91 (d,  $J = 3.2$  Hz, 1H), 6.17 (dd,  $J = 1.8$  Hz, 3.2 Hz, 1H), 6.74 (d,  $J = 9.0$  Hz, 2H) 6.90 (d,  $J = 9.0$  Hz, 2H), 7.27 (dd,  $J = 0.9$  Hz, 1.9 Hz, 1H);  $^{13}\text{C}$ -NMR (75 MHz,  $\text{CDCl}_3$ )  $\delta$  23.59, 24.83, 41.33, 50.17, 55.38, 59.55, 65.17, 107.99, 109.87, 114.00 (2C), 121.70 (2C), 141.00, 145.68, 154.26, 154.55;

HRMS (ESI): Calcd for  $\text{C}_{17}\text{H}_{21}\text{NO}_3$  ( $\text{MH}^+$ ): 288.1599, Found. 288.1595.

$[\alpha]_D^{25} = -41.6$  ( $c$  0.5,  $\text{CHCl}_3$ , 68% ee); Enantiomeric excess was determined by HPLC with a Chiralpak IA column ( $n$ -Hexane:  $i$ -PrOH = 90:10), 0.5 mL/min; major enantiomer  $t_R = 18.401$  min, minor enantiomer  $t_R = 22.956$  min.

**((2R, 3S)-1-(4-methoxyphenyl)-2-((E)-styryl)piperidin-3-yl)methanol (7w):**

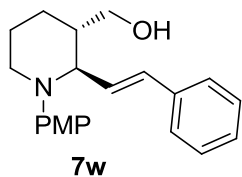

**7w:**  $^1\text{H}$  NMR (400 MHz,  $\text{CDCl}_3$ )  $\delta$  1.54-1.65 (m, 1H), 1.81-1.88 (m, 2H), 1.92-2.01 (m, 2H), 3.00-3.08 (m, 1H), 3.19-3.24 (m, 1H), 3.76 (s, 3H), 3.80 (dd,  $J = 5.3$  Hz, 10.7 Hz, 1H), 3.93 (dd,  $J = 5.5$  Hz, 10.7 Hz, 1H) 3.97 (dd,  $J = 5.3$  Hz, 7.3 Hz, 1H), 6.21 (dd,  $J = 7.3$  Hz, 16.2 Hz, 1H), 6.34 (d,  $J = 16.3$  Hz, 1H), 6.81 (d,  $J = 9.0$  Hz, 2H), 7.00 (d,  $J = 9.0$  Hz, 2H), 7.18-7.23 (m, 1H), 7.25-7.29 (m, 4H);  $^{13}\text{C}$ -NMR (75 MHz,  $\text{CDCl}_3$ )  $\delta$  23.64, 24.37, 41.95, 49.58, 55.40, 63.55, 65.62, 114.12 (2C), 122.29 (2C), 126.16 (2C), 127.25, 128.39 (2C), 129.46, 132.13, 136.99, 145.55, 154.54;

HRMS (ESI): Calcd for  $\text{C}_{21}\text{H}_{25}\text{NO}_2$  ( $\text{MH}^+$ ) 324.1963, Found 324.1967.

$[\alpha]_D^{25} = -28.0$  ( $c$  0.5,  $\text{CHCl}_3$ , 68% ee);

Enantiomeric excess was determined by HPLC with a Chiralpak IA column ( $n$ -Hexane:  $i$ -PrOH = 90:10), 0.5 mL/min; major enantiomer  $t_R = 23.015$  min, minor enantiomer  $t_R = 28.844$  min.

**((2S, 3S)-ethyl 3-(hydroxymethyl)-1-(4-methoxyphenyl)piperidine-2-carboxylate (7x):**

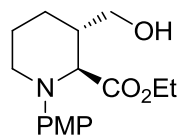

**7x**

**7w**:  $^1\text{H}$  NMR (500 MHz,  $\text{CDCl}_3$ )  $\delta$  1.11 (t,  $J = 71$ . Hz, 1H), 1.54-1.59 (m, 1H), 1.64-1.73 (m, 2H), 2.26-2.30 (m, 1H), 3.07-3.12 (m, 1H), 3.33-3.39 (m, 1H), 3.71 (dd,  $J = 5.3$  Hz, 10.6 Hz, 1H), 3.73 (s, 3H), 3.88 (dd,  $J = 7.8$  Hz, 10.6 Hz, 1H), 4.04 (dq,  $J = 2.8$  Hz, 7.2 Hz, 14.1 Hz, 2H), 4.22 (d,  $J = 6.1$  Hz, 1H), 6.78 (d,  $J = 9.1$  Hz, 2H), 6.92 (d,  $J = 9.0$  Hz, 2H);  $^{13}\text{C}$ -NMR (75 MHz,  $\text{CDCl}_3$ )  $\delta$  14.06, 21.98, 23.36, 39.26, 47.90, 55.36, 60.40, 62.59, 63.88, 114.15 (2C), 119.82 (2C), 145.57, 153.86, 172.97;

HRMS (ESI): Calcd for  $\text{C}_{16}\text{H}_{23}\text{NO}_4$  ( $\text{MH}^+$ ) 294.1705, Found 294.1701.

$[\alpha]_{\text{D}}^{25} = +27.4$  ( $c$  0.5,  $\text{CHCl}_3$ , 99% ee);

Enantiomeric excess was determined by HPLC with a Chiralpak IA column ( $n$ -Hexane:  $i$ -PrOH = 90:10), 0.5 mL/min; major enantiomer  $t_{\text{R}} = 20.197$  min, major enantiomer  $t_{\text{R}} = 23.325$  min.

**((2S, 3S)-(pyridin-3-yl)piperidin-3-yl)methanol (8)**:

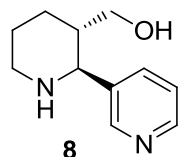

**8**:  $^1\text{H}$  NMR (400 MHz,  $\text{CDCl}_3$ )  $\delta$  1.5-1.68 (m, 5H), 2.18 (s, 1H, NH), 2.35-2.39 (m, 2H), 3.37-3.40 (m, 2H), 3.77 (s, 1H, OH), 4.08 (d,  $J = 8.7$  Hz, 1H), 7.30 (dd,  $J = 4.9$  Hz, 11.8 Hz, 1H), 7.74 (d,  $J = 7.9$  Hz, 1H), 8.52 (d,  $J = 3.6$  Hz, 1H) 8.59 (s, 1H);  $^{13}\text{C}$ -NMR (75 MHz,  $\text{CDCl}_3$ )  $\delta$  25.72, 27.64, 42.87, 46.06, 64.98, 67.62, 136.92, 146.36 148.29, 153.65, 155.20;

HRMS (ESI): Calcd. for  $\text{C}_{11}\text{H}_{16}\text{N}_2\text{O}$  ( $\text{MH}^+$ ) 193.1341, Found: 193.1345.

$[\alpha]_{\text{D}}^{25} = +9.2$  ( $c$  1.0, MeOH).

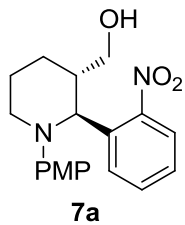

nisar srinagar-500  
 2-NO<sub>2</sub>-Piperidine

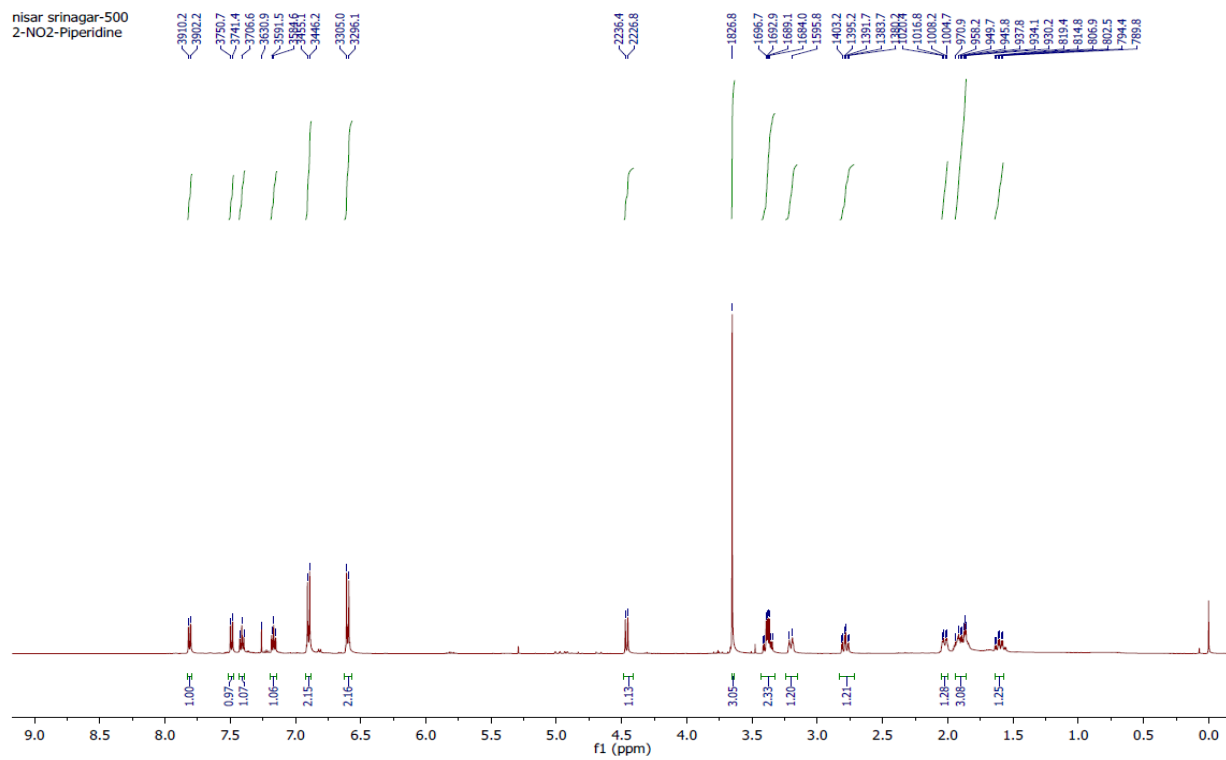

156.15  
 150.82  
 145.56

137.11  
 132.49  
 130.52  
 127.46  
 125.92  
 123.26

113.91

77.00

64.43  
 60.89  
 57.85  
 55.16

47.22

27.50  
 25.81

nisar srinagar-500  
 2-NO<sub>2</sub>-Piperidine

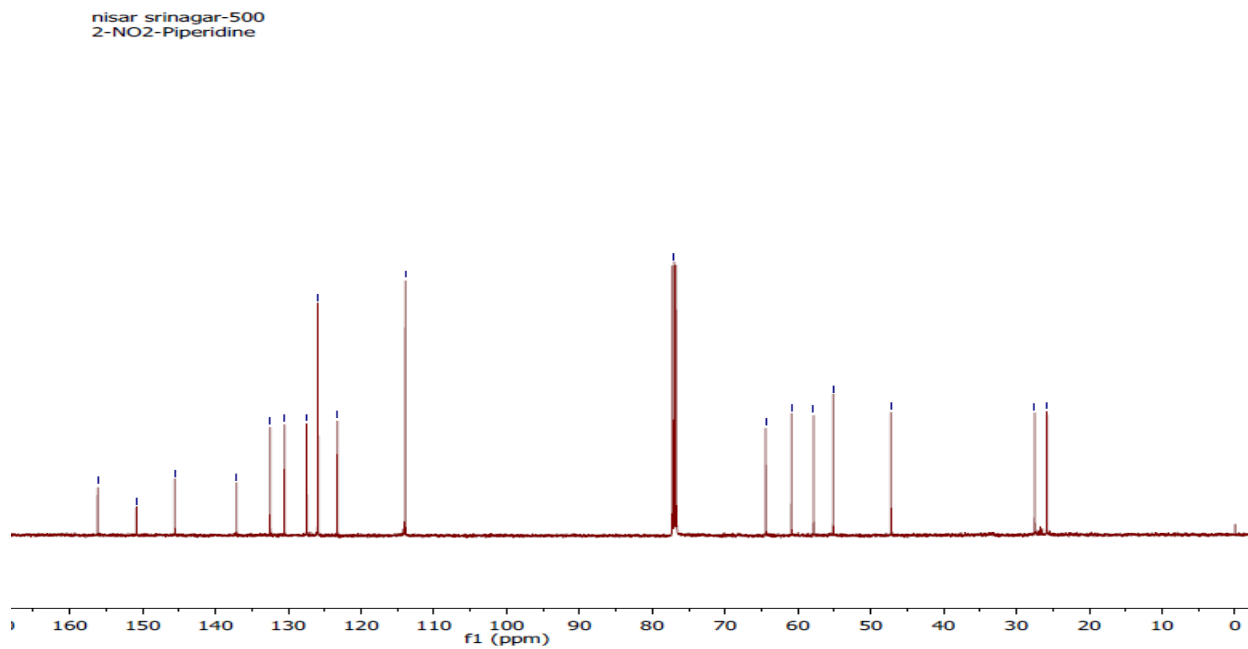

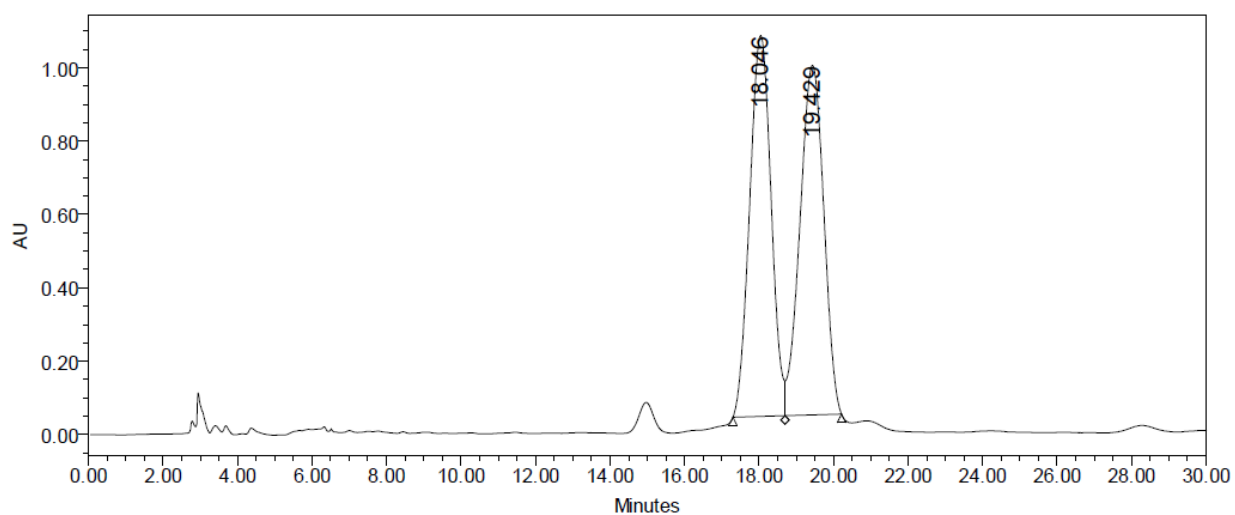

Channel: 2998; Processed Channel: PDA 210.0 nm; Result Id: 1064; Processing Method: 2Nitro recenic1

**Processed Channel Descr.: PDA 210.0 nm**

|   | Processed Channel Descr. | RT     | Area     | % Area | Height  |
|---|--------------------------|--------|----------|--------|---------|
| 1 | PDA 210.0 nm             | 18.046 | 41469079 | 49.51  | 1038473 |
| 2 | PDA 210.0 nm             | 19.429 | 42284147 | 50.49  | 953468  |

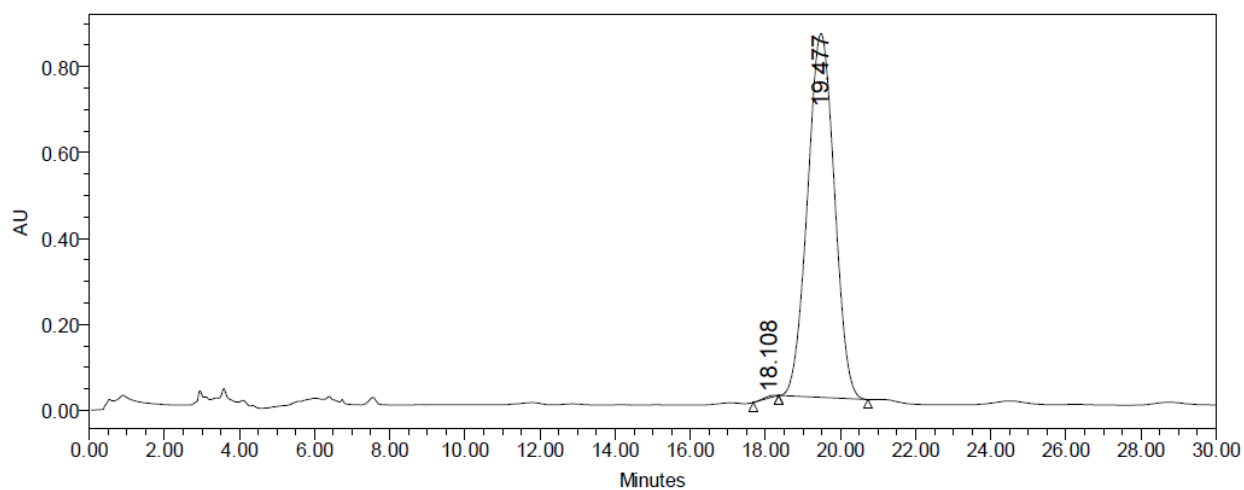

Channel: 2998; Processed Channel: PDA 250.0 nm; Result Id: 1985; Processing Method: 2 Nitro piperidine chiral

**Processed Channel Descr.: PDA 250.0 nm**

|   | Processed Channel Descr. | RT     | Area     | % Area | Height |
|---|--------------------------|--------|----------|--------|--------|
| 1 | PDA 250.0 nm             | 18.108 | 91731    | 0.22   | 4343   |
| 2 | PDA 250.0 nm             | 19.477 | 42051291 | 99.78  | 845952 |



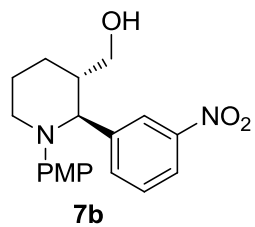

20 AUG  
3-NO<sub>2</sub> PIPERIDINE

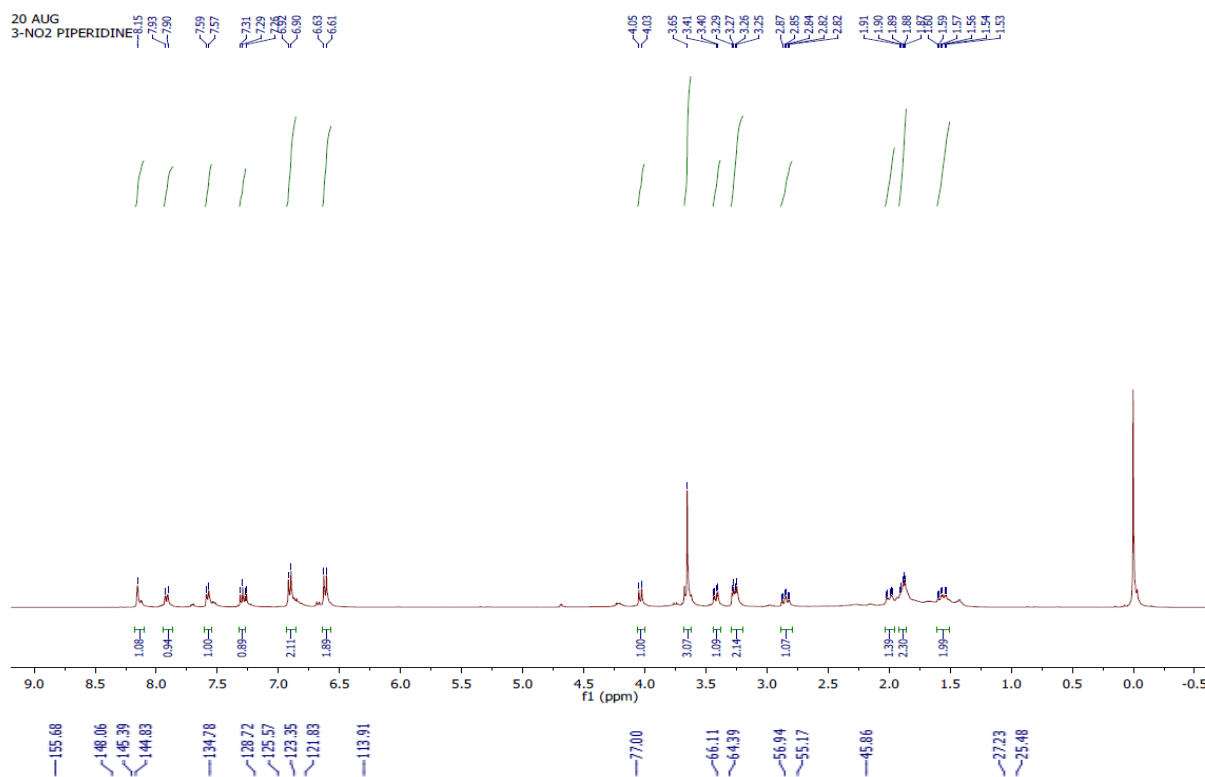

Aug21-2012  
3-NO<sub>2</sub> Piperidine

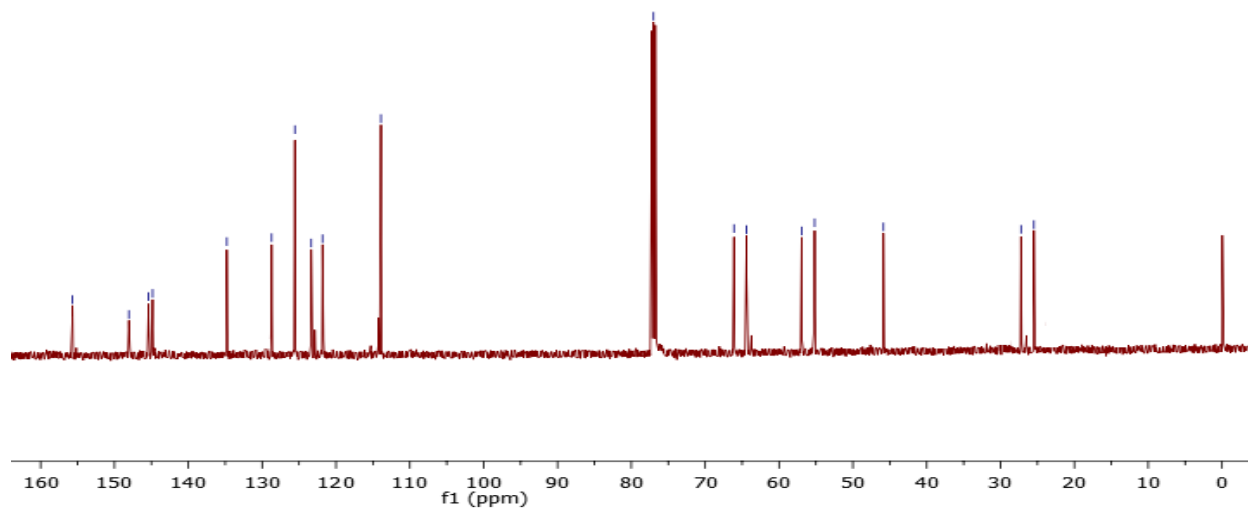

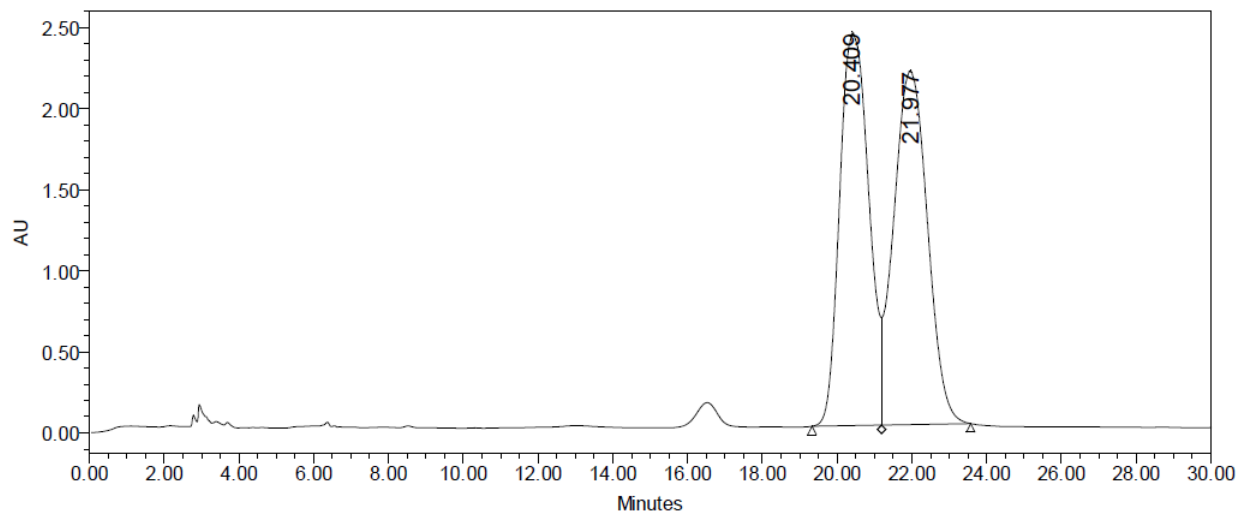

Channel: 2998; Processed Channel: PDA 210.0 nm; Result Id: 1066; Processing Method: 3Nitro recemic

**Processed Channel Descr.: PDA 210.0 nm**

|   | Processed Channel Descr. | RT     | Area      | % Area | Height  |
|---|--------------------------|--------|-----------|--------|---------|
| 1 | PDA 210.0 nm             | 20.409 | 130810325 | 48.75  | 2430254 |
| 2 | PDA 210.0 nm             | 21.977 | 137531423 | 51.25  | 2184559 |

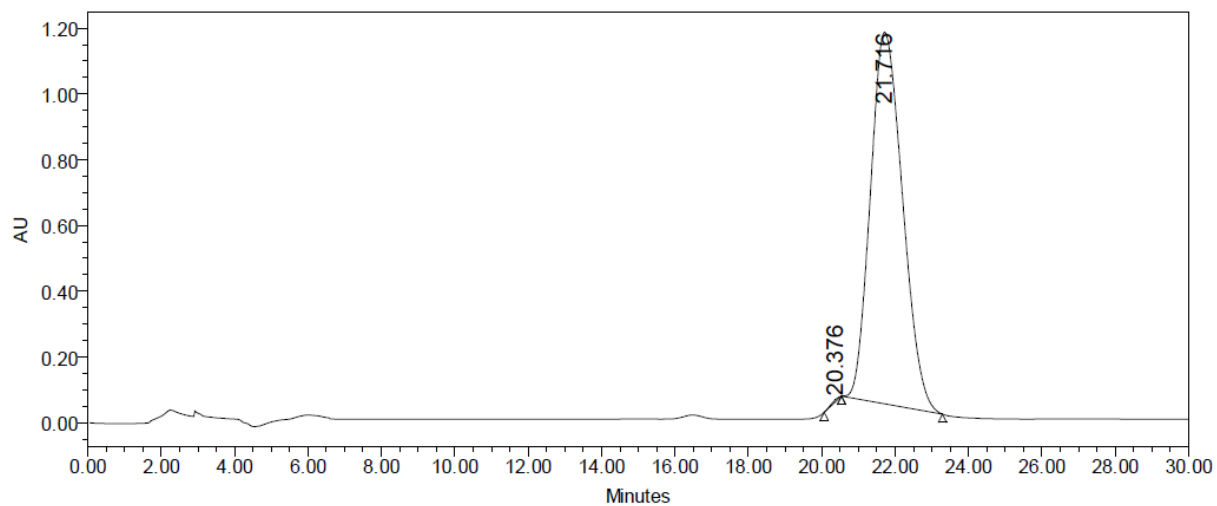

Channel: 2998; Processed Channel: PDA 290.0 nm; Result Id: 1077; Processing Method: 3Nitro chirall

**Processed Channel Descr.: PDA 290.0 nm**

|   | Processed Channel Descr. | RT     | Area     | % Area | Height  |
|---|--------------------------|--------|----------|--------|---------|
| 1 | PDA 290.0 nm             | 20.376 | 102301   | 0.15   | 6605    |
| 2 | PDA 290.0 nm             | 21.716 | 68820586 | 99.85  | 1129483 |

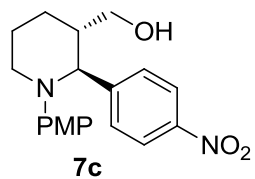

20 AUG  
4-NITRO PIPERIDINE

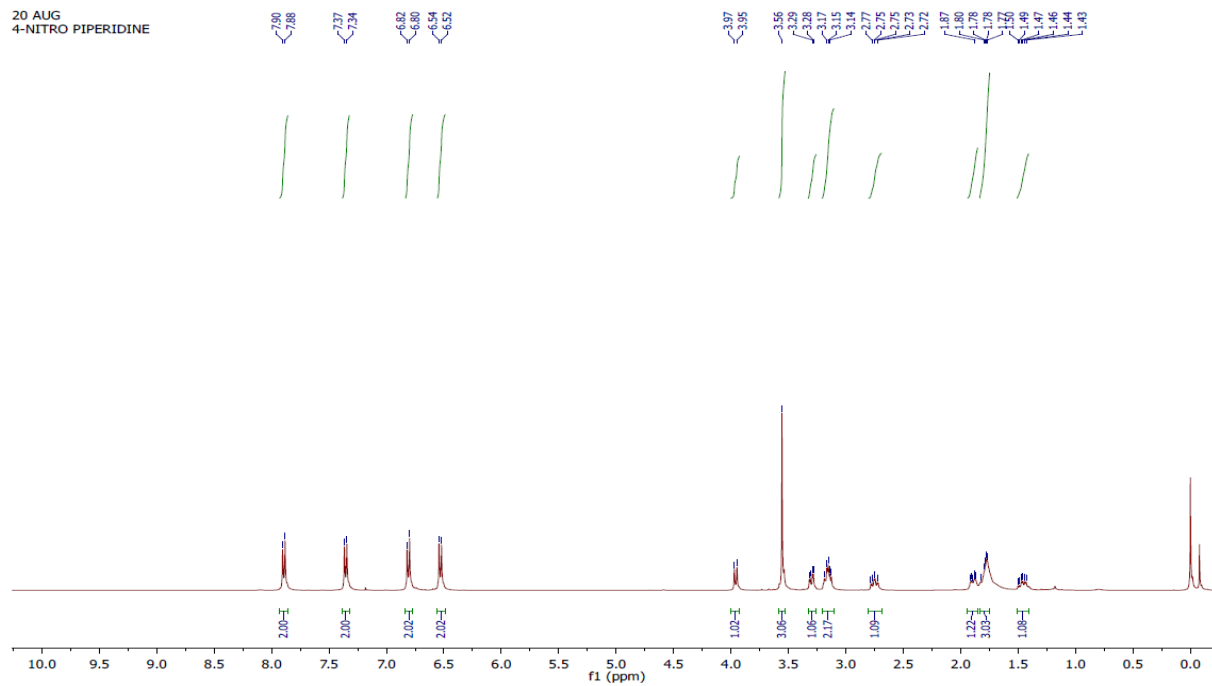

AUG 21  
4-Nitropiperidine

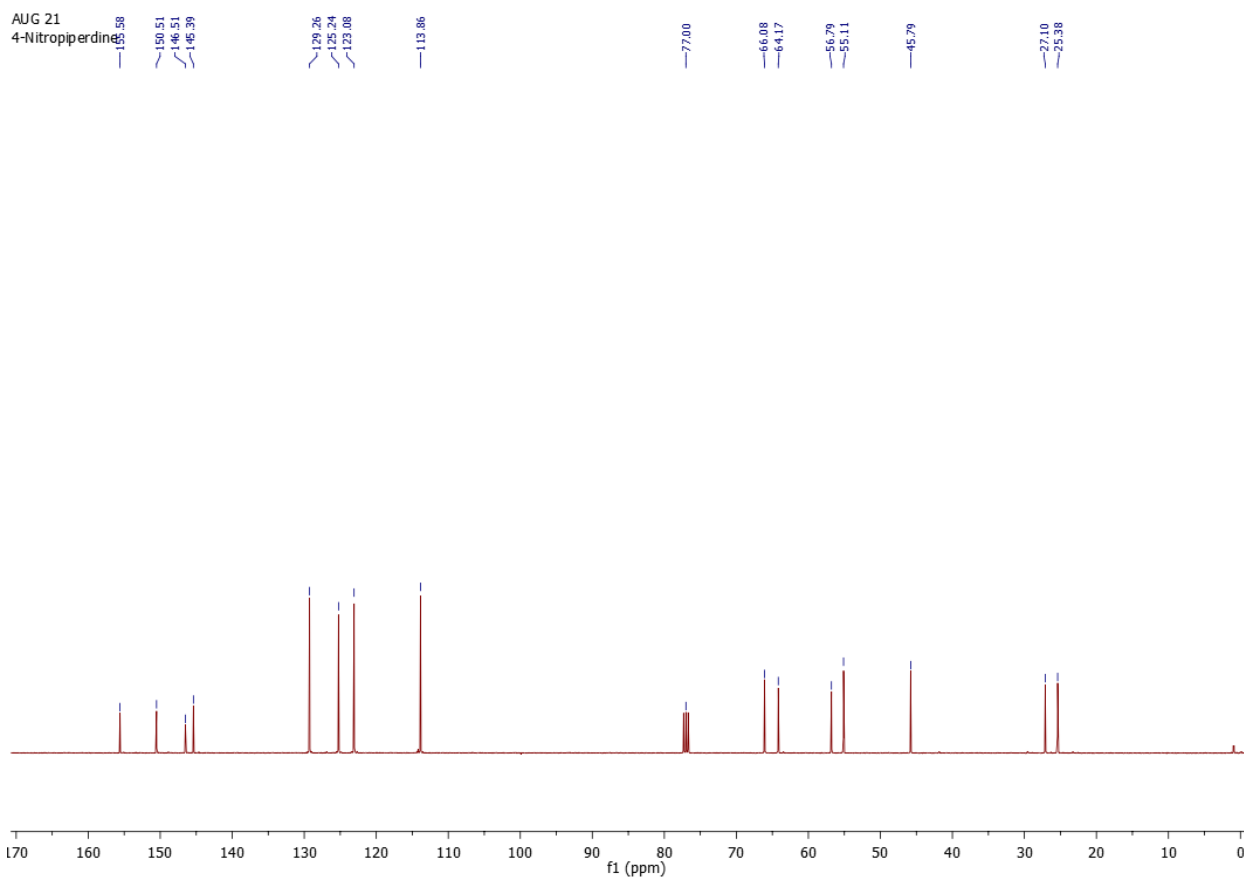

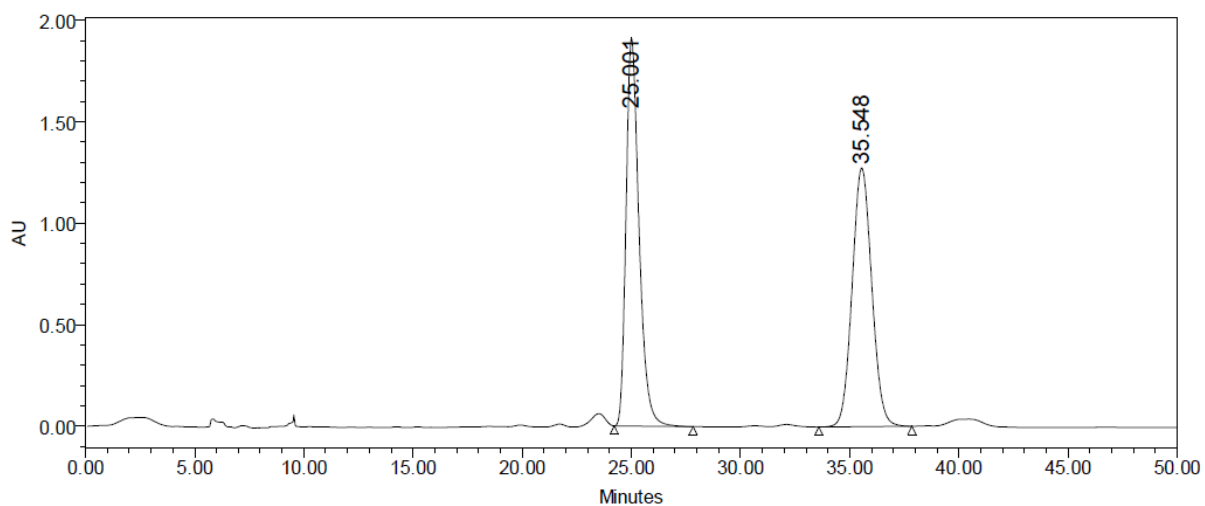

Channel: 2998; Processed Channel: PDA 210.0 nm; Result Id: 1137; Processing Method: 4Nitro recimic

**Processed Channel Descr.: PDA 210.0 nm**

|   | Processed Channel Descr. | RT     | Area     | % Area | Height  |
|---|--------------------------|--------|----------|--------|---------|
| 1 | PDA 210.0 nm             | 25.001 | 78936708 | 49.78  | 1912322 |
| 2 | PDA 210.0 nm             | 35.548 | 79635847 | 50.22  | 1274748 |

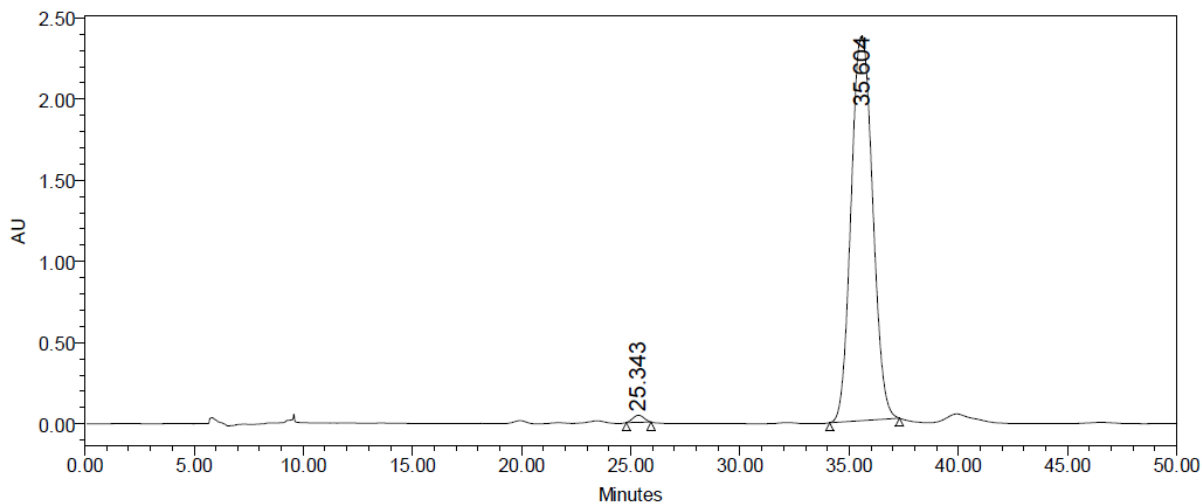

Channel: 2998; Processed Channel: PDA 210.0 nm; Result Id: 1140; Processing Method: 4Nitro chiral

**Processed Channel Descr.: PDA 210.0 nm**

|   | Processed Channel Descr. | RT     | Area      | % Area | Height  |
|---|--------------------------|--------|-----------|--------|---------|
| 1 | PDA 210.0 nm             | 25.343 | 1544346   | 0.94   | 44023   |
| 2 | PDA 210.0 nm             | 35.604 | 162803331 | 99.06  | 2370119 |

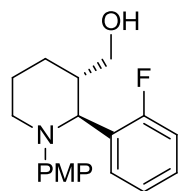

**7d**

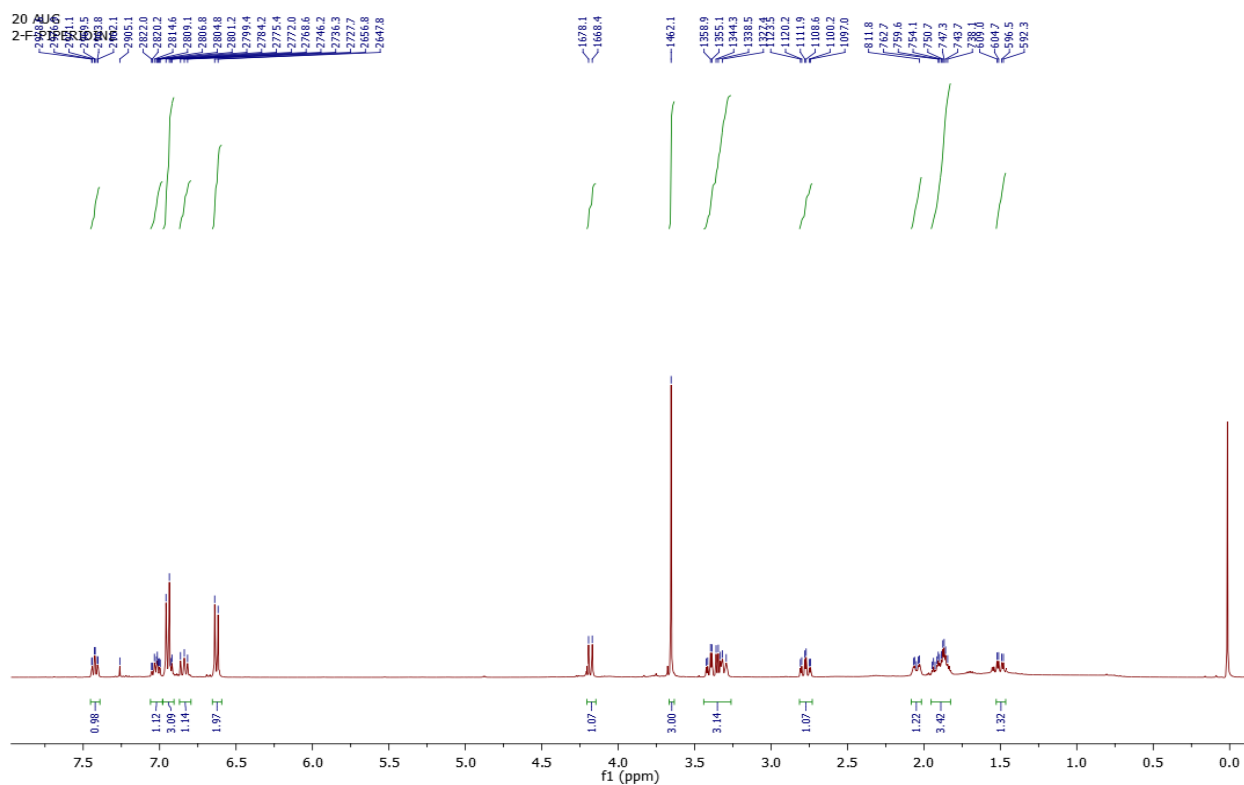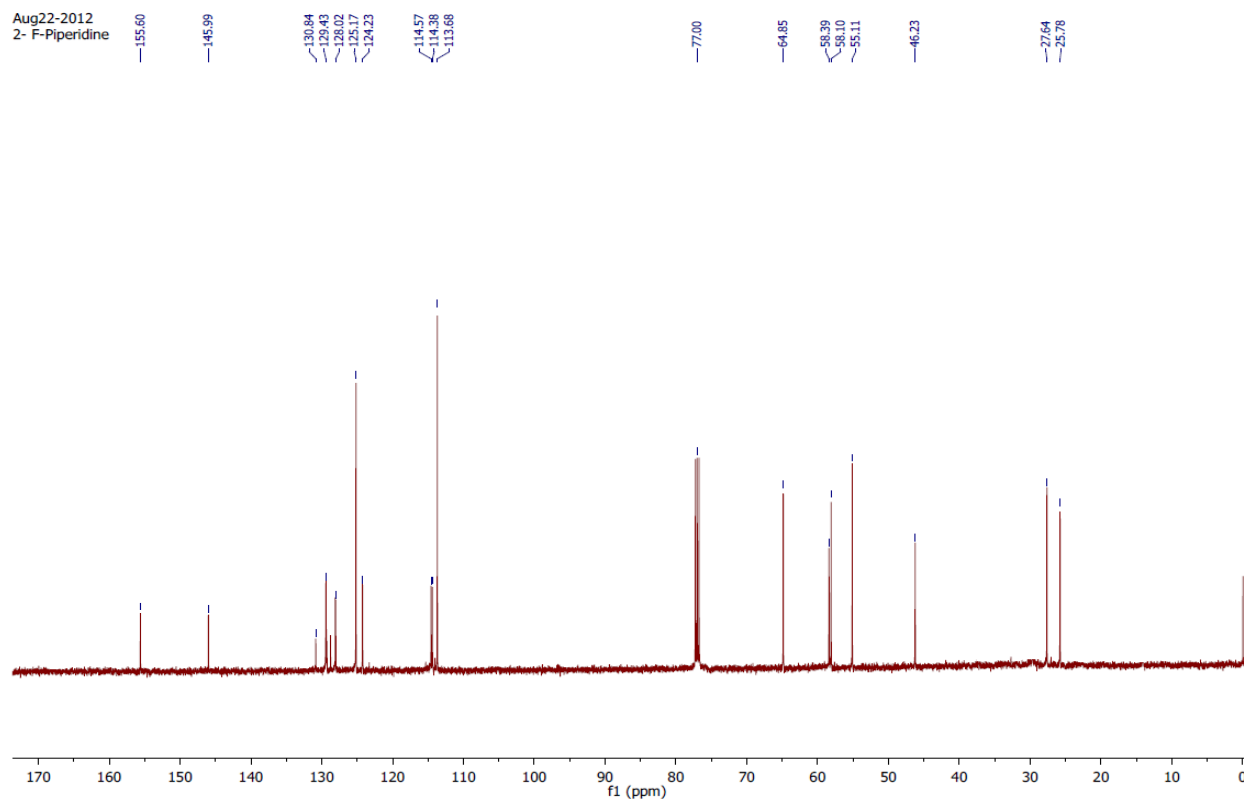

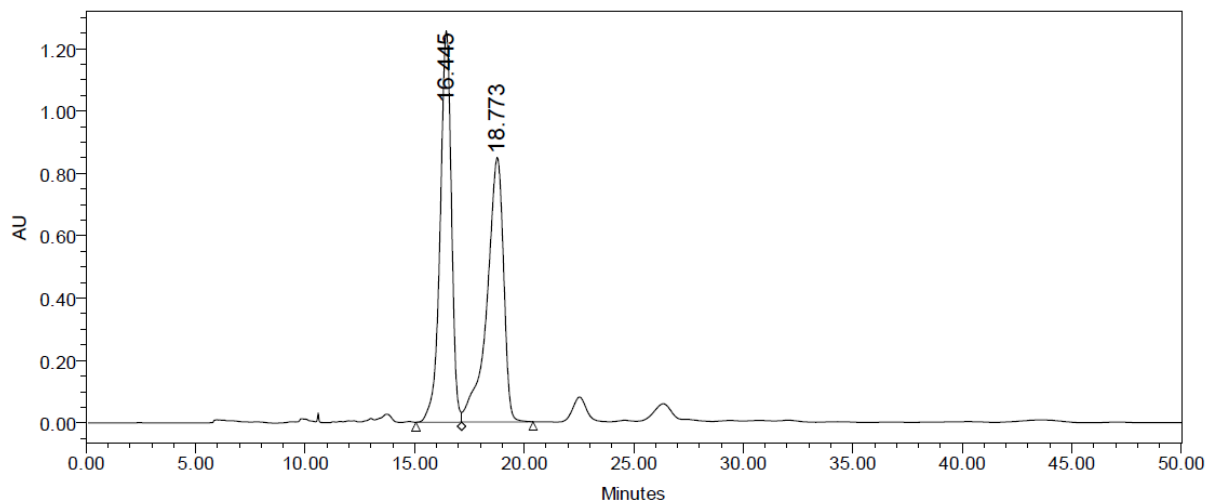

Channel: 2998; Processed Channel: PDA 270.0 nm; Result Id: 1752; Processing Method: 2F recenic

**Processed Channel Descr.: PDA 270.0 nm**

|   | Processed Channel Descr. | RT     | Area     | % Area | Height  |
|---|--------------------------|--------|----------|--------|---------|
| 1 | PDA 270.0 nm             | 16.445 | 44890220 | 49.97  | 1254449 |
| 2 | PDA 270.0 nm             | 18.773 | 44946439 | 50.03  | 847666  |

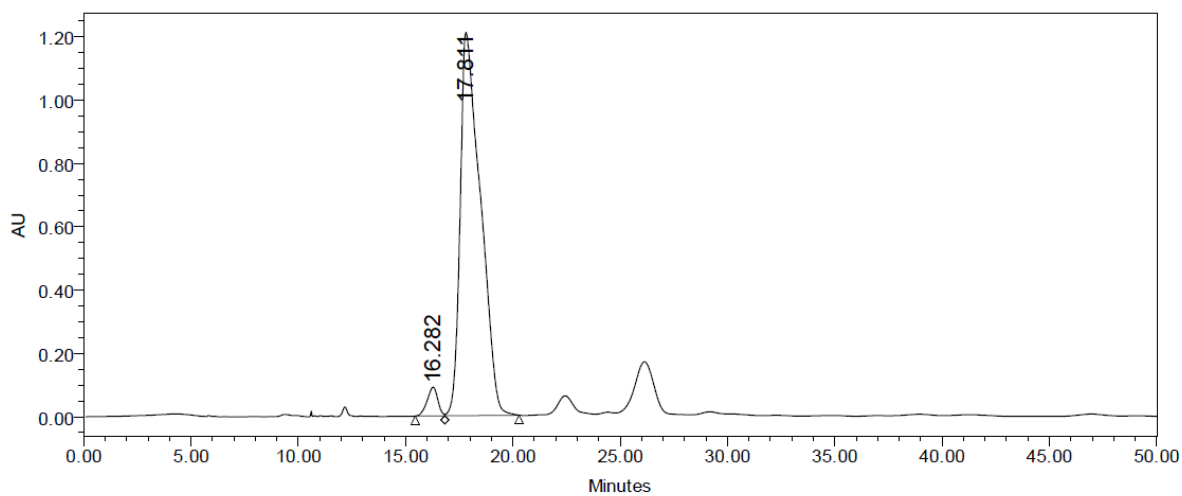

Channel: 2998; Processed Channel: PDA 330.0 nm; Result Id: 1754; Processing Method: 2F chiral

**Processed Channel Descr.: PDA 330.0 nm**

|   | Processed Channel Descr. | RT     | Area     | % Area | Height  |
|---|--------------------------|--------|----------|--------|---------|
| 1 | PDA 330.0 nm             | 16.282 | 3112409  | 3.77   | 90847   |
| 2 | PDA 330.0 nm             | 17.811 | 79373988 | 96.23  | 1209574 |

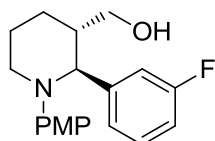

7e

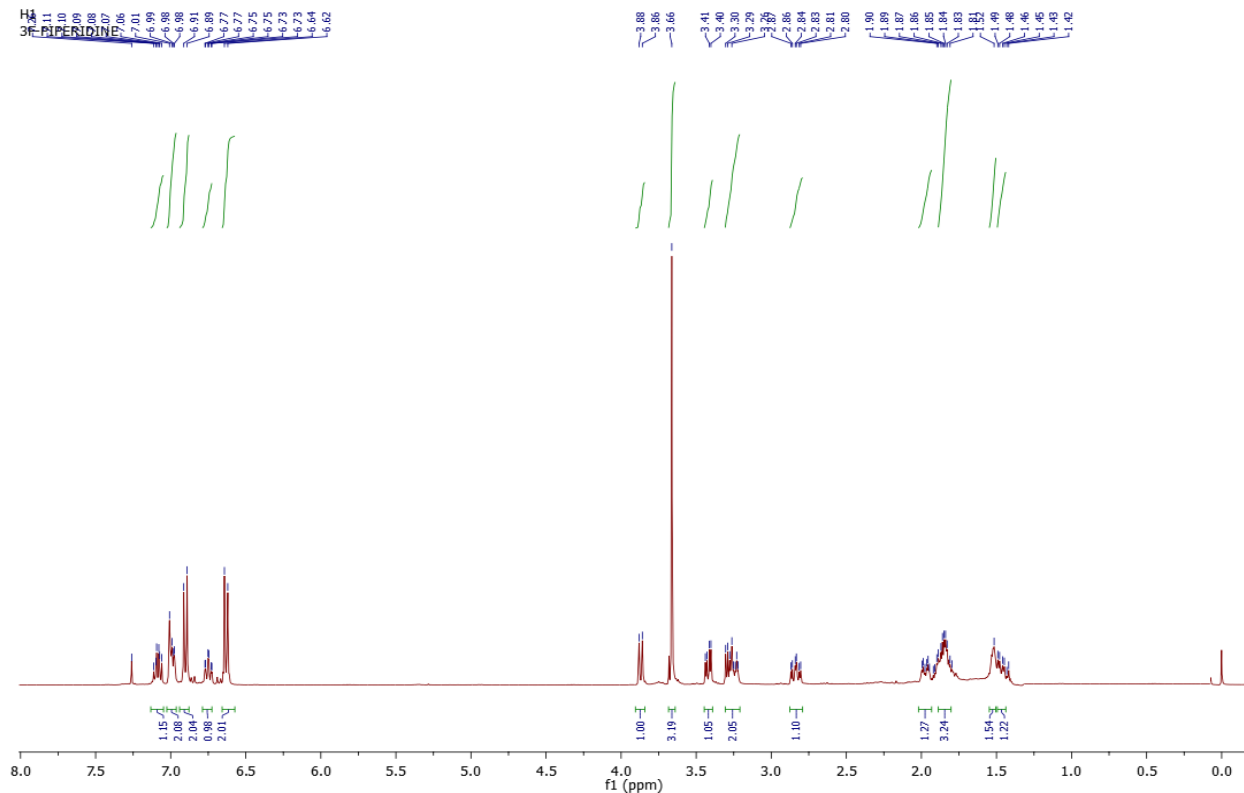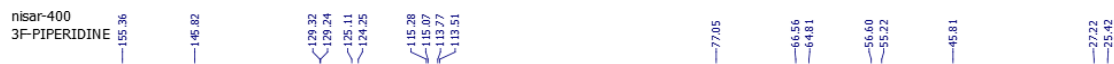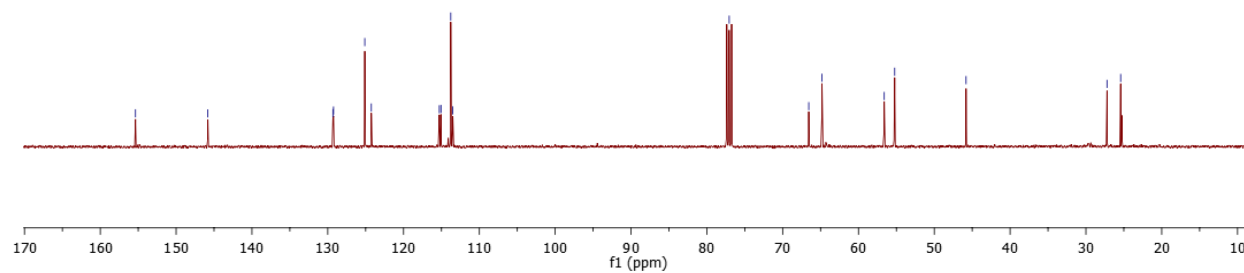

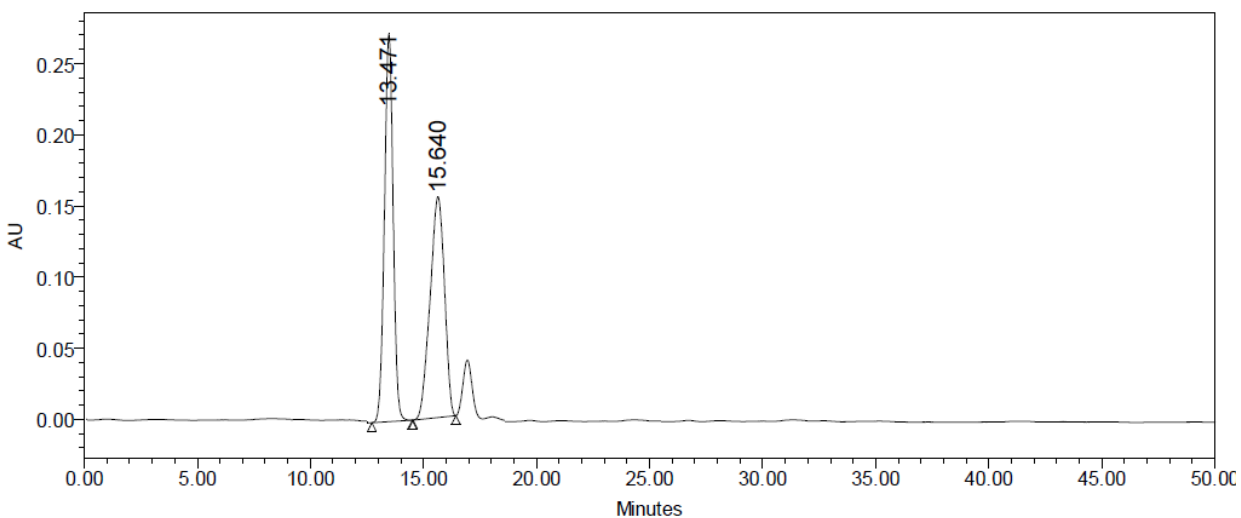

Channel: 2998; Processed Channel: PDA 240.0 nm; Result Id: 1471; Processing Method: 3F recemic

**Processed Channel Descr.: PDA 240.0 nm**

|   | Processed Channel Descr. | RT     | Area    | % Area | Height |
|---|--------------------------|--------|---------|--------|--------|
| 1 | PDA 240.0 nm             | 13.471 | 7288927 | 51.43  | 272804 |
| 2 | PDA 240.0 nm             | 15.640 | 6884027 | 48.57  | 155233 |

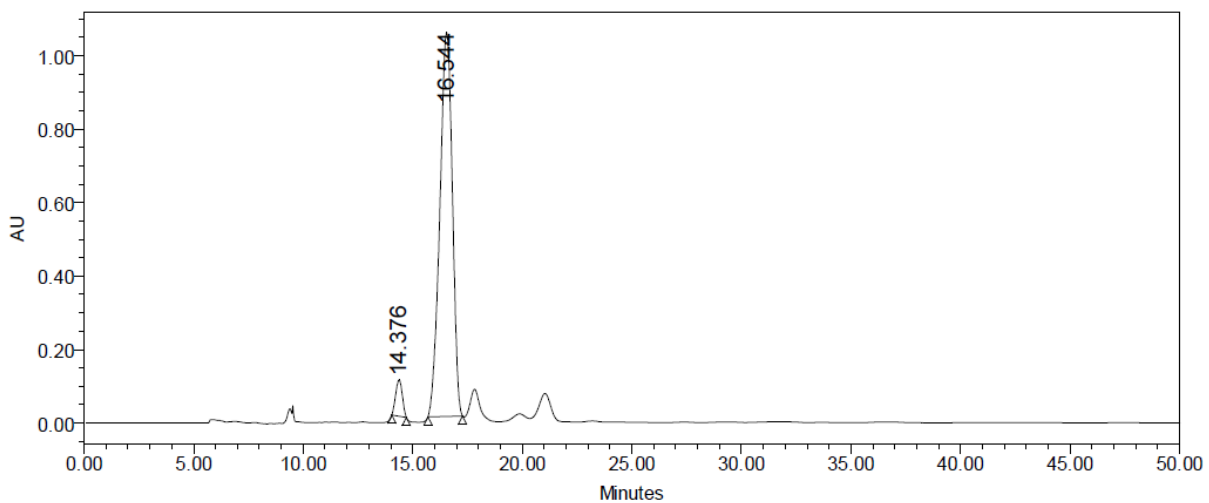

Channel: 2998; Processed Channel: PDA 250.0 nm; Result Id: 1479; Processing Method: 3F chiral

**Processed Channel Descr.: PDA 250.0 nm**

|   | Processed Channel Descr. | RT     | Area     | % Area | Height  |
|---|--------------------------|--------|----------|--------|---------|
| 1 | PDA 250.0 nm             | 14.376 | 2073031  | 4.77   | 98996   |
| 2 | PDA 250.0 nm             | 16.544 | 41431402 | 95.23  | 1045288 |



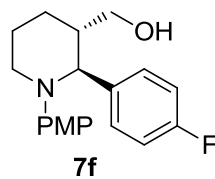

20 AUG  
4-F-PIPERIDINE

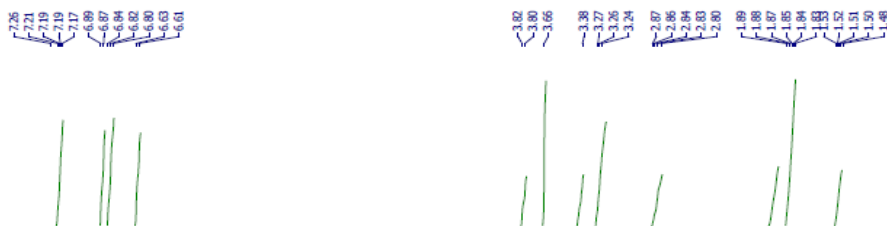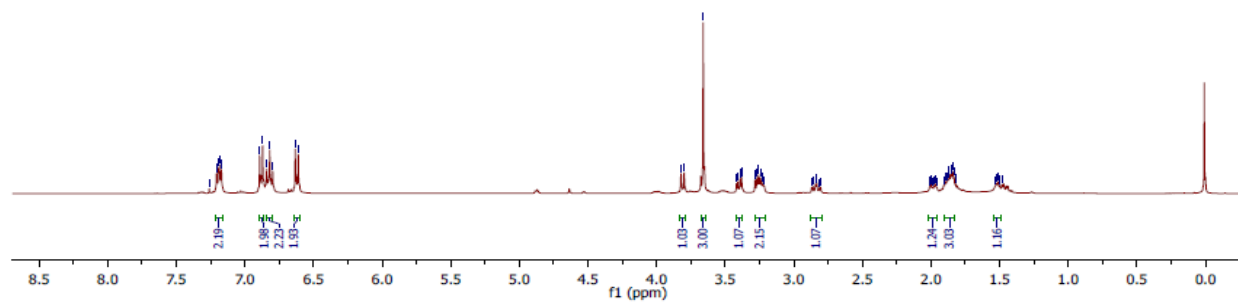

21 AUG  
4-F-Piperidine

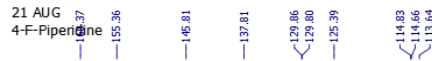

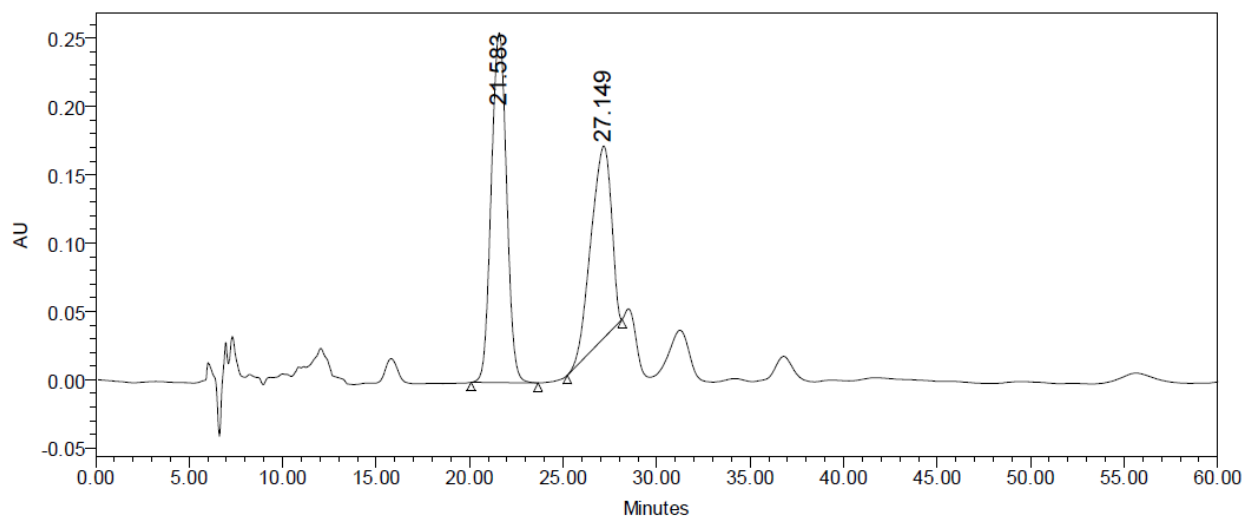

Channel: 2998; Processed Channel: PDA 250.0 nm; Result Id: 1057; Processing Method: 4F pip racemic

**Processed Channel Descr.: PDA 250.0 nm**

|   | Processed Channel Descr. | RT     | Area     | % Area | Height |
|---|--------------------------|--------|----------|--------|--------|
| 1 | PDA 250.0 nm             | 21.583 | 14578306 | 57.65  | 255984 |
| 2 | PDA 250.0 nm             | 27.149 | 10707781 | 42.35  | 140594 |

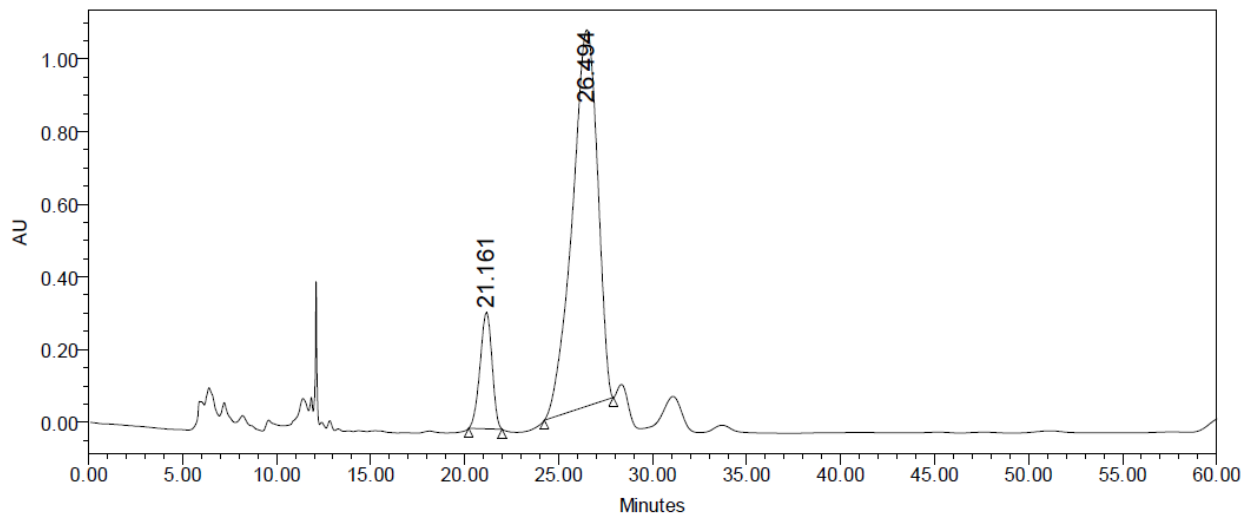

Channel: 2998; Processed Channel: PDA 250.0 nm; Result Id: 1054; Processing Method: 4F pip chiral new

**Processed Channel Descr.: PDA 250.0 nm**

|   | Processed Channel Descr. | RT     | Area     | % Area | Height  |
|---|--------------------------|--------|----------|--------|---------|
| 1 | PDA 250.0 nm             | 21.161 | 14194207 | 12.75  | 319965  |
| 2 | PDA 250.0 nm             | 26.494 | 97114795 | 87.25  | 1036415 |

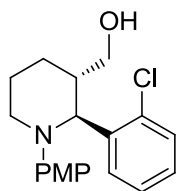

**7g**

2- CL PIP  
2-CL-PIPERIDINE

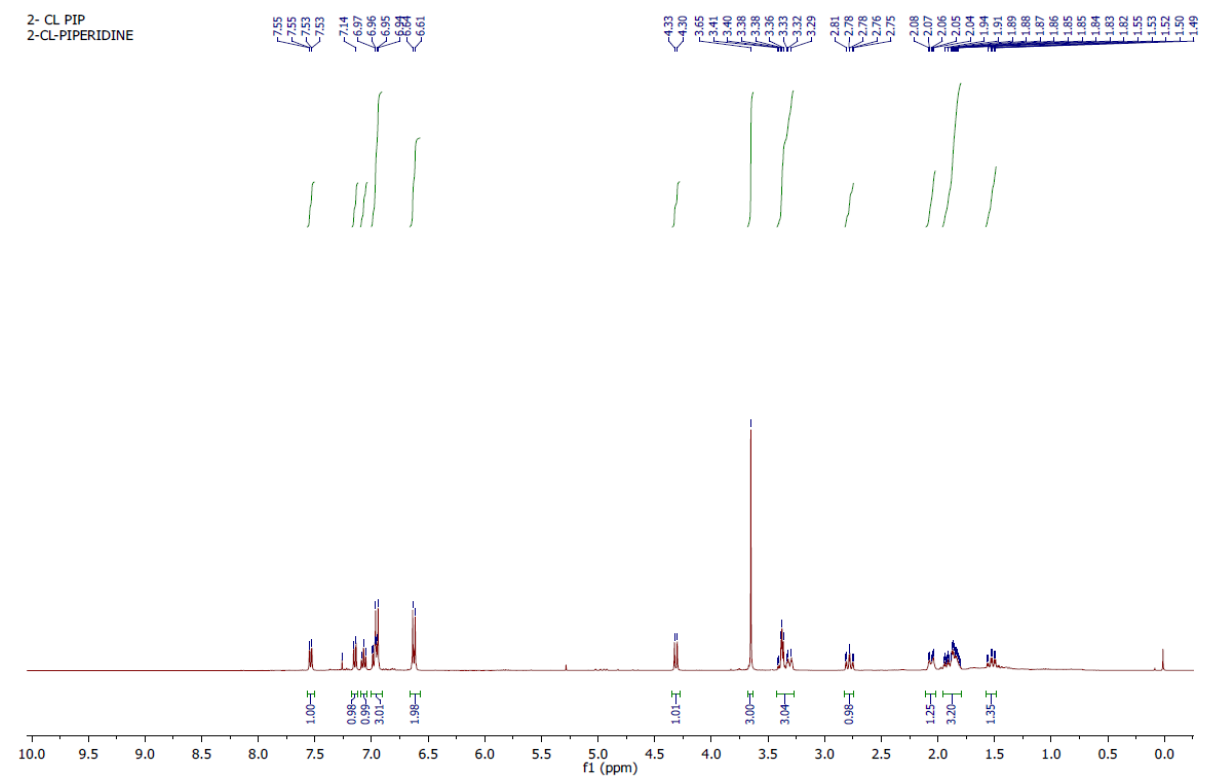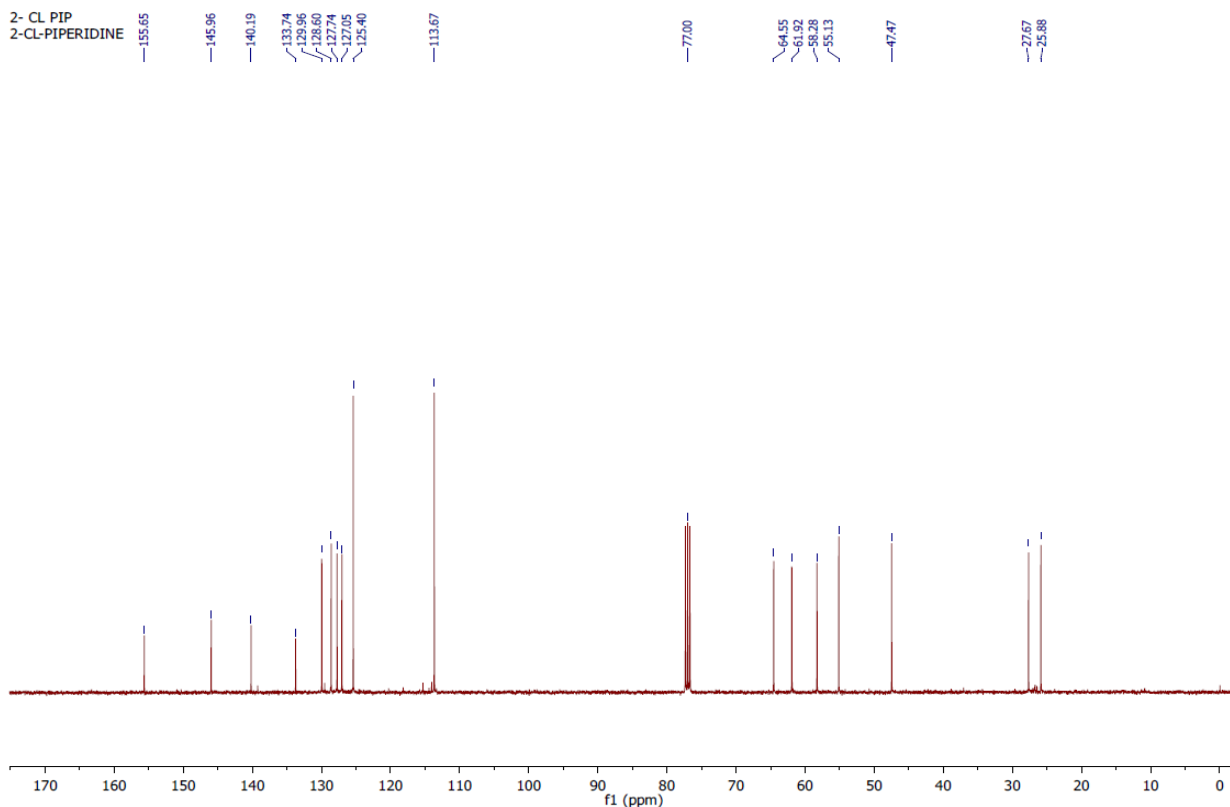

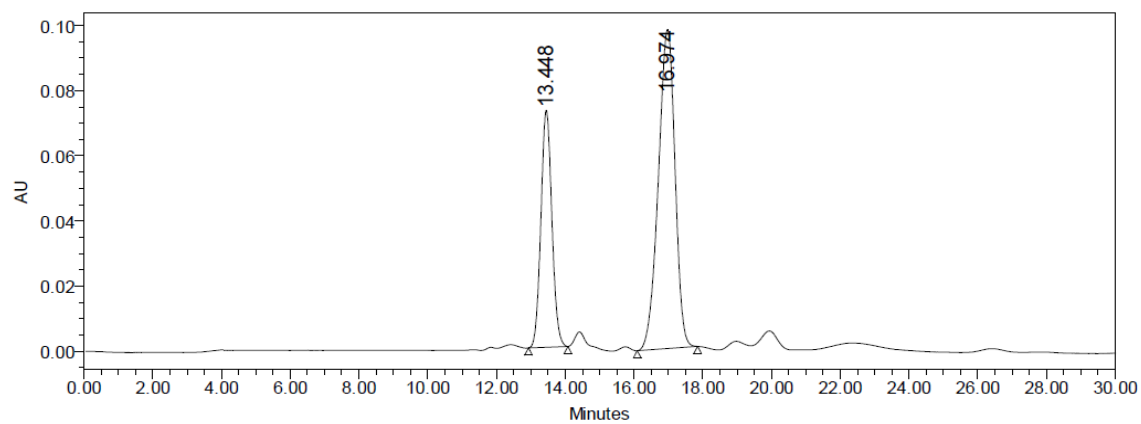

Channel: 2998; Processed Channel: PDA 300.0 nm; Result Id: 1767; Processing Method: 2Cl piperidine reneric

**Processed Channel Descr.: PDA 300.0 nm**

|   | Processed Channel Descr. | RT     | Area    | % Area | Height |
|---|--------------------------|--------|---------|--------|--------|
| 1 | PDA 300.0 nm             | 13.448 | 1613647 | 32.86  | 72813  |
| 2 | PDA 300.0 nm             | 16.974 | 3297467 | 67.14  | 97936  |

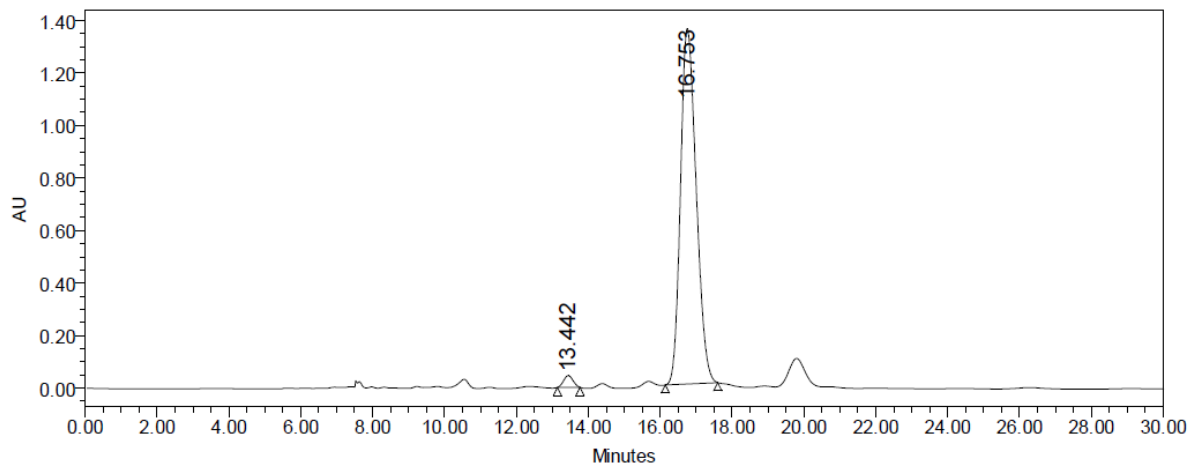

Channel: 2998; Processed Channel: PDA 300.0 nm; Result Id: 1772; Processing Method: 2Cl piperidine chiral

**Processed Channel Descr.: PDA 300.0 nm**

|   | Processed Channel Descr. | RT     | Area     | % Area | Height  |
|---|--------------------------|--------|----------|--------|---------|
| 1 | PDA 300.0 nm             | 13.442 | 823932   | 1.97   | 45031   |
| 2 | PDA 300.0 nm             | 16.753 | 41026803 | 98.03  | 1353690 |

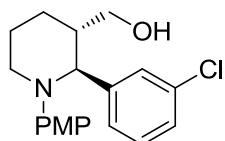

7h

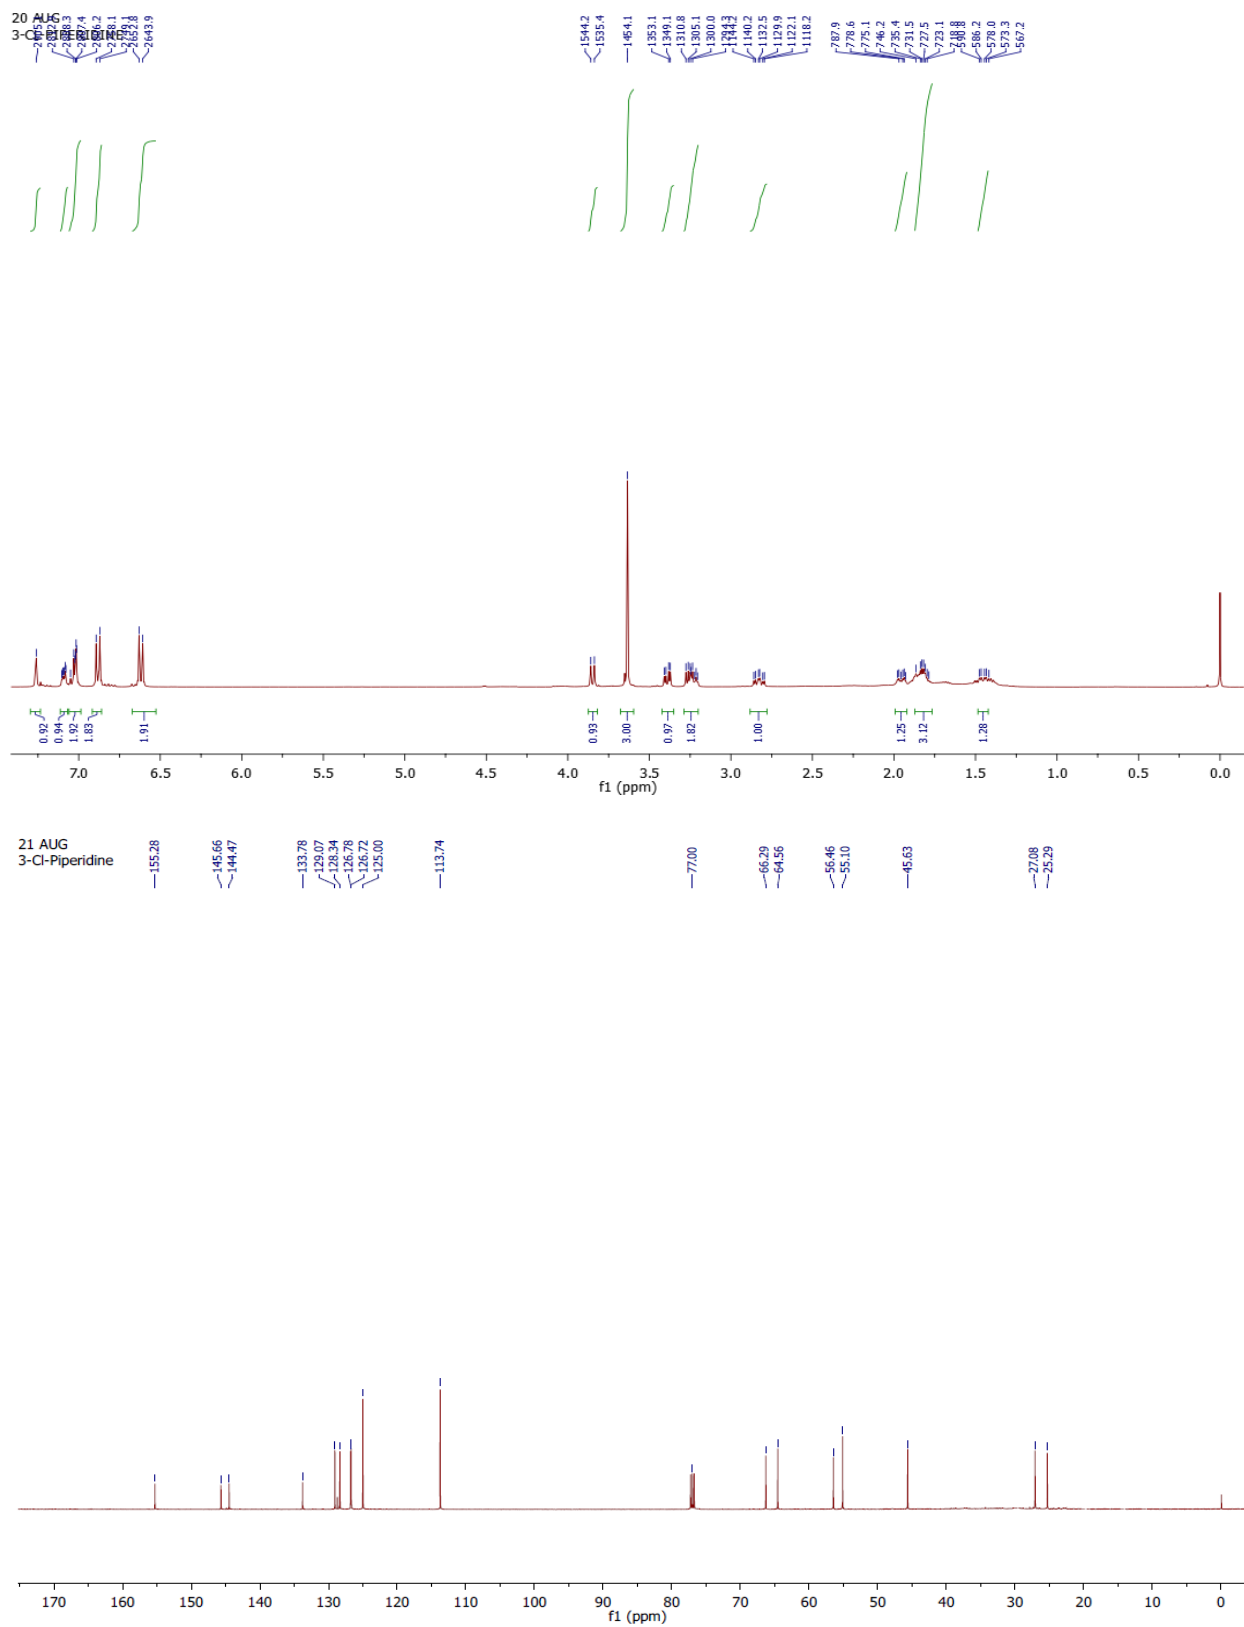

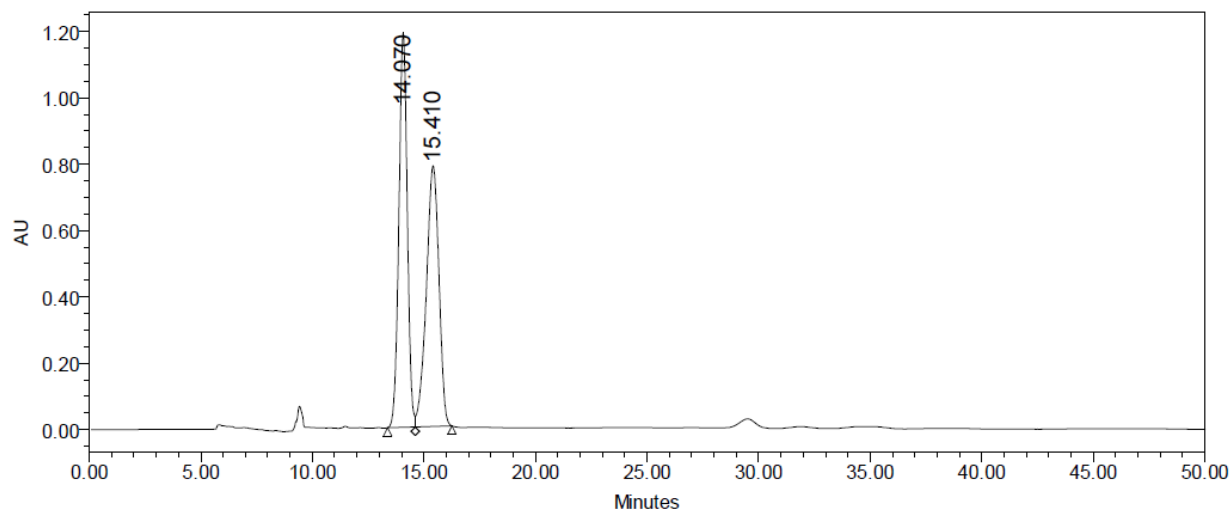

Channel: 2998; Processed Channel: PDA 250.0 nm; Result Id: 1306; Processing Method: 3Cl recemic

**Processed Channel Descr.: PDA 250.0 nm**

|   | Processed Channel Descr. | RT     | Area     | % Area | Height  |
|---|--------------------------|--------|----------|--------|---------|
| 1 | PDA 250.0 nm             | 14.070 | 31139180 | 50.21  | 1189865 |
| 2 | PDA 250.0 nm             | 15.410 | 30874380 | 49.79  | 785864  |

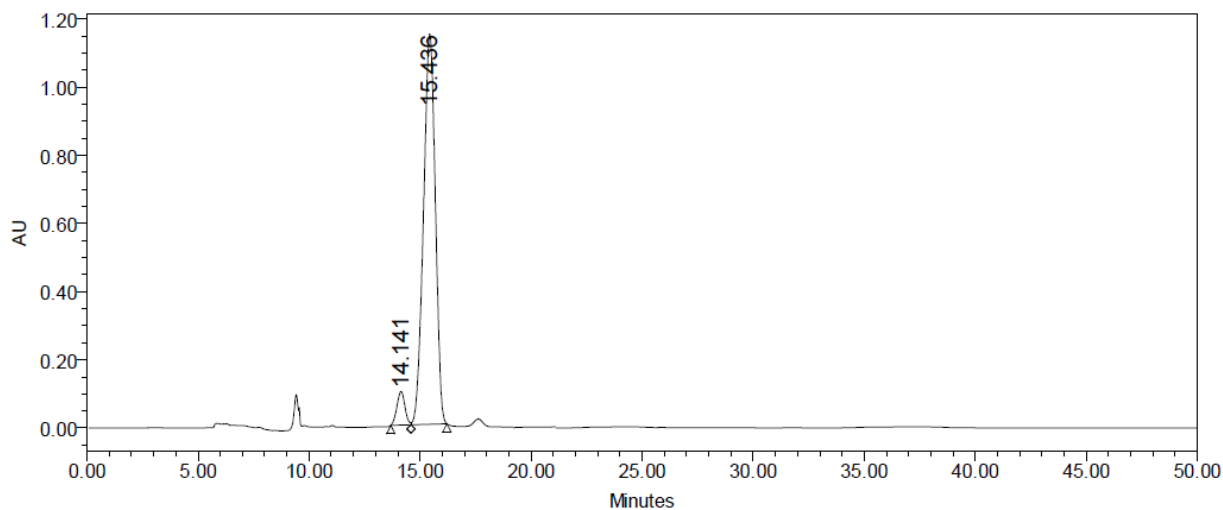

Channel: 2998; Processed Channel: PDA 250.0 nm; Result Id: 1308; Processing Method: 3Cl chiral

**Processed Channel Descr.: PDA 250.0 nm**

|   | Processed Channel Descr. | RT     | Area     | % Area | Height  |
|---|--------------------------|--------|----------|--------|---------|
| 1 | PDA 250.0 nm             | 14.141 | 2464969  | 5.50   | 98920   |
| 2 | PDA 250.0 nm             | 15.436 | 42313747 | 94.50  | 1144466 |

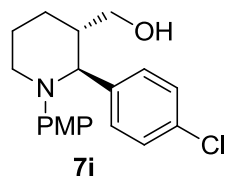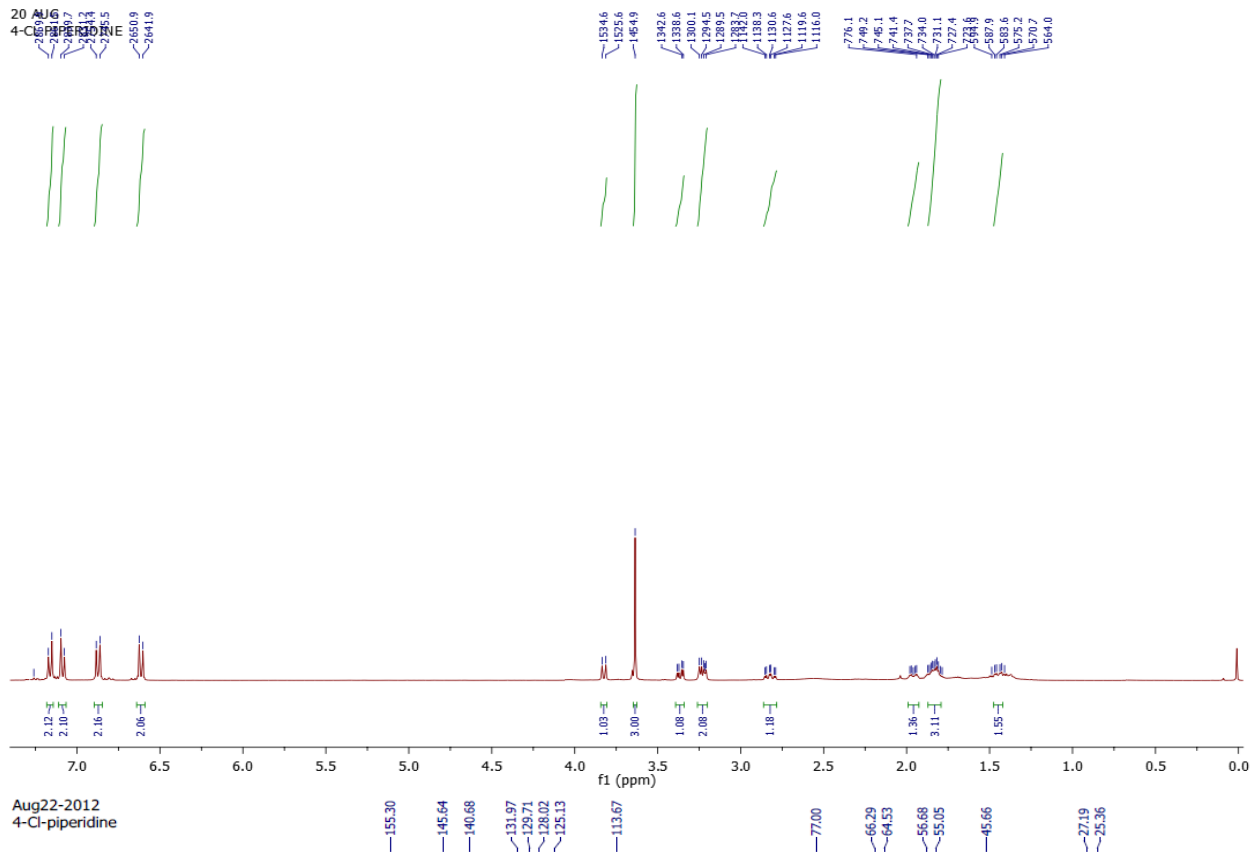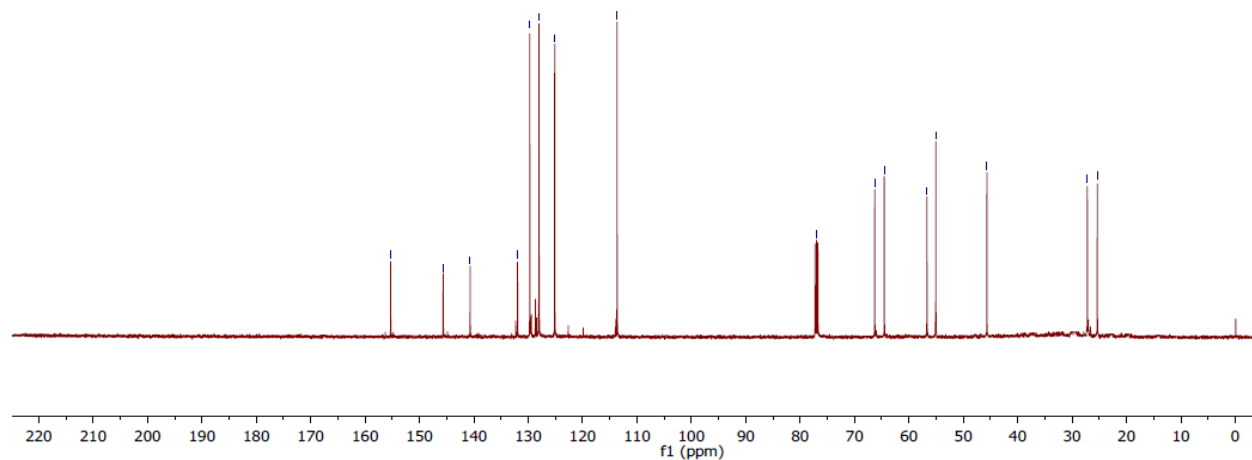

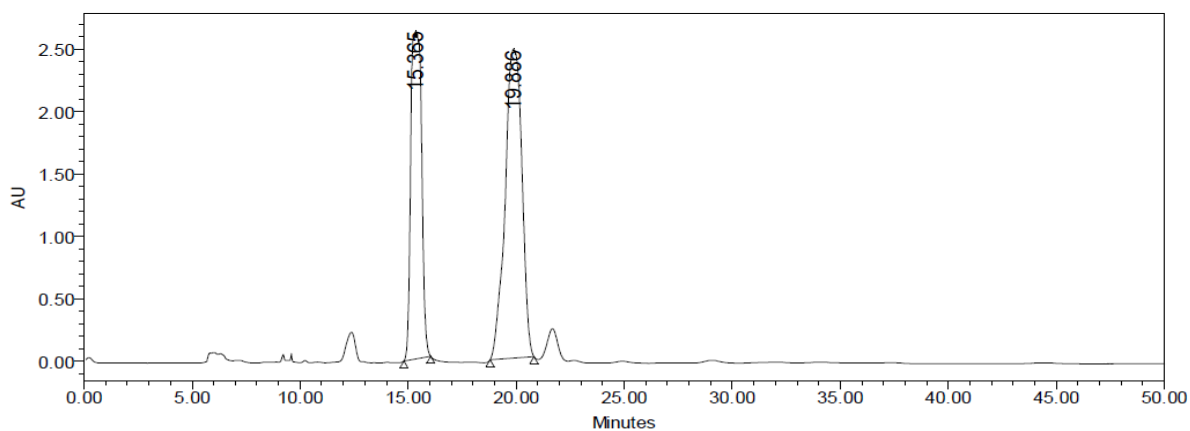

Channel: 2998; Processed Channel: PDA 210.0 nm; Result Id: 1287; Processing Method: 4Cl recemic

**Processed Channel Descr.: PDA 210.0 nm**

|   | Processed Channel Descr. | RT     | Area      | % Area | Height  |
|---|--------------------------|--------|-----------|--------|---------|
| 1 | PDA 210.0 nm             | 15.365 | 91272006  | 40.51  | 2629622 |
| 2 | PDA 210.0 nm             | 19.886 | 134056490 | 59.49  | 2478964 |

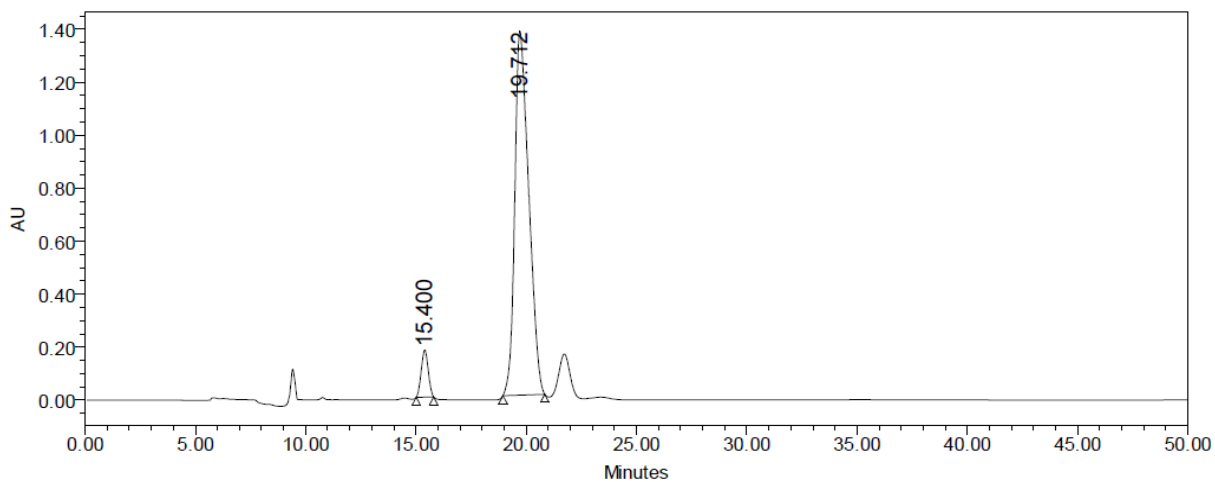

Channel: 2998; Processed Channel: PDA 282.7 nm; Result Id: 1293; Processing Method: 4Cl chiral

**Processed Channel Descr.: PDA 282.7 nm**

|   | Processed Channel Descr. | RT     | Area     | % Area | Height  |
|---|--------------------------|--------|----------|--------|---------|
| 1 | PDA 282.7 nm             | 15.400 | 3887100  | 6.05   | 177507  |
| 2 | PDA 282.7 nm             | 19.712 | 60404025 | 93.95  | 1373424 |



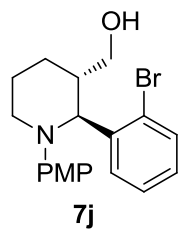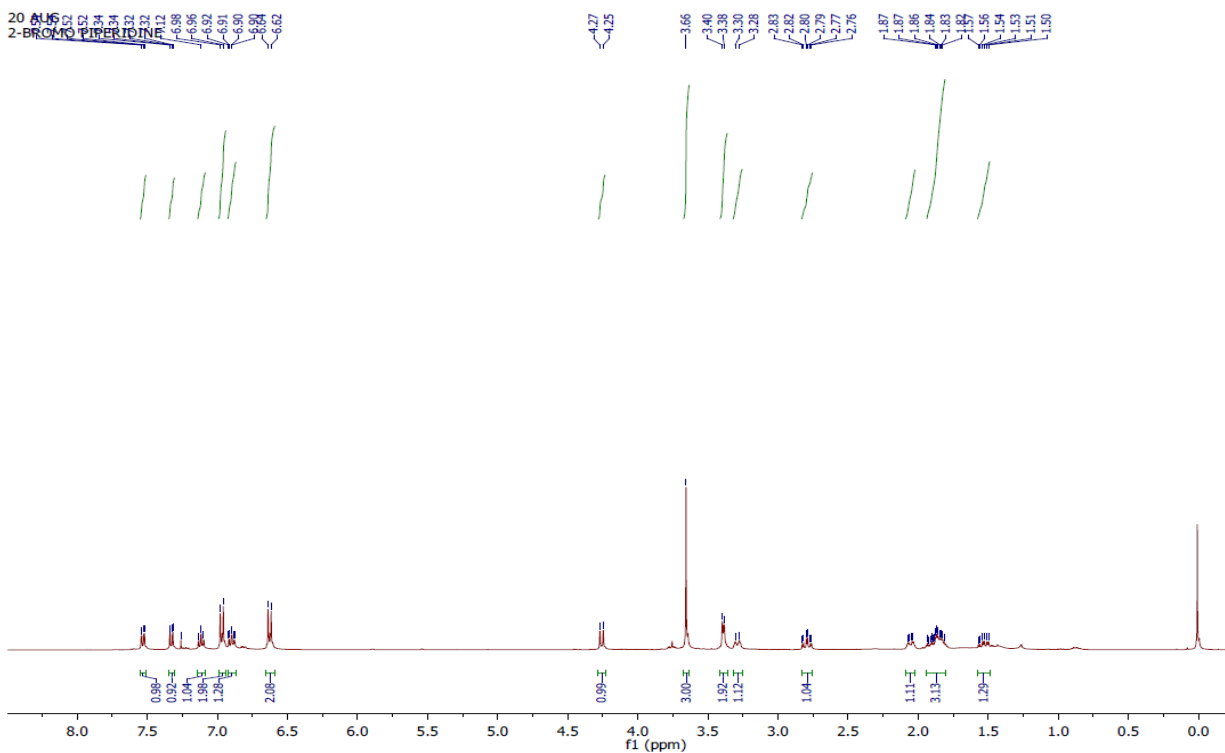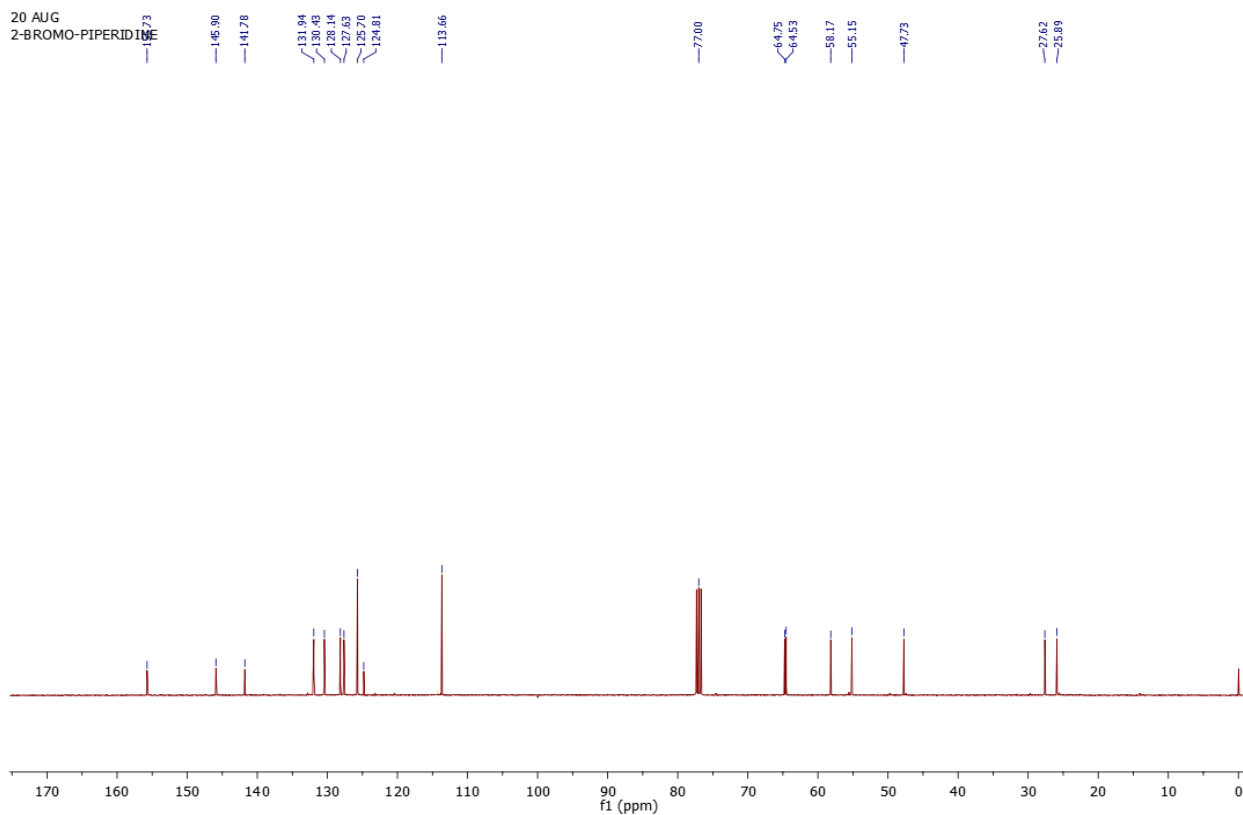

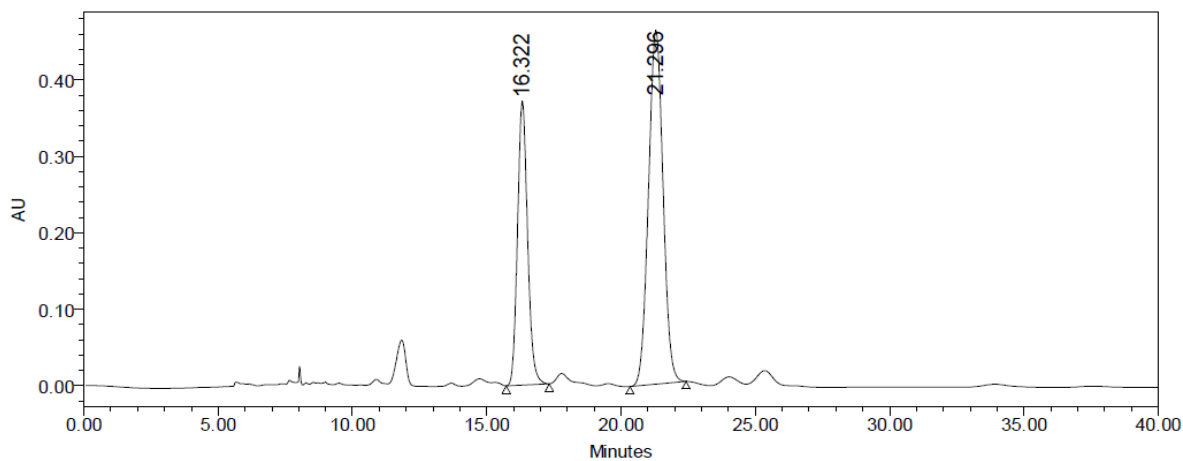

Channel: 2998; Processed Channel: PDA 250.0 nm; Result Id: 1813; Processing Method: 2Br Recenic

**Processed Channel Descr.: PDA 250.0 nm**

|   | Processed Channel Descr. | RT     | Area     | % Area | Height |
|---|--------------------------|--------|----------|--------|--------|
| 1 | PDA 250.0 nm             | 16.322 | 9679938  | 35.69  | 371809 |
| 2 | PDA 250.0 nm             | 21.296 | 17441934 | 64.31  | 463158 |

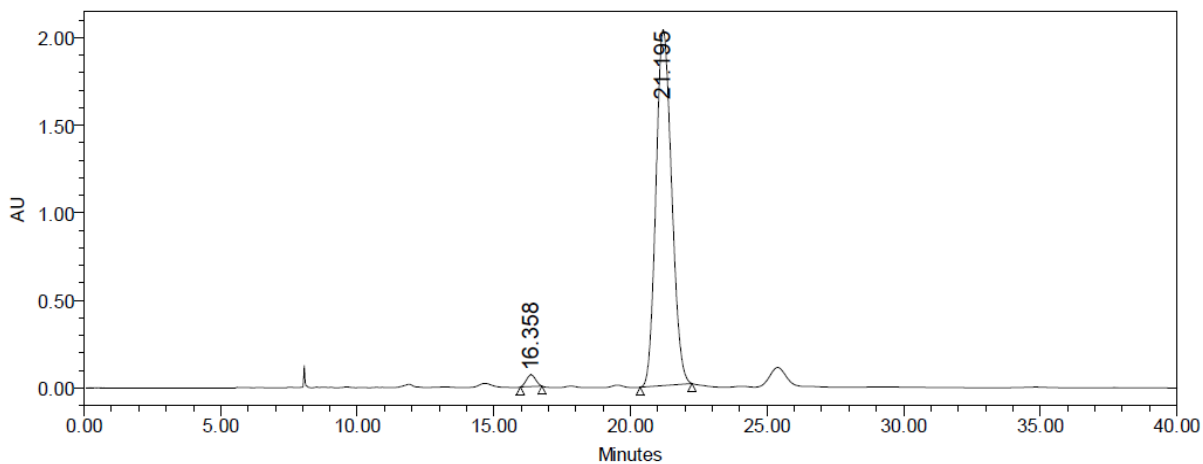

Channel: 2998; Processed Channel: PDA 270.0 nm; Result Id: 1816; Processing Method: 2Br piperidine chiral

**Processed Channel Descr.: PDA 270.0 nm**

|   | Processed Channel Descr. | RT     | Area     | % Area | Height  |
|---|--------------------------|--------|----------|--------|---------|
| 1 | PDA 270.0 nm             | 16.358 | 1558627  | 1.89   | 66994   |
| 2 | PDA 270.0 nm             | 21.195 | 81101716 | 98.11  | 2031551 |

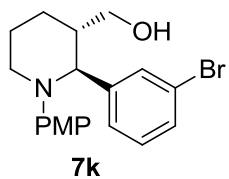

5-oct-2012  
3-BR-PIPERIDINE

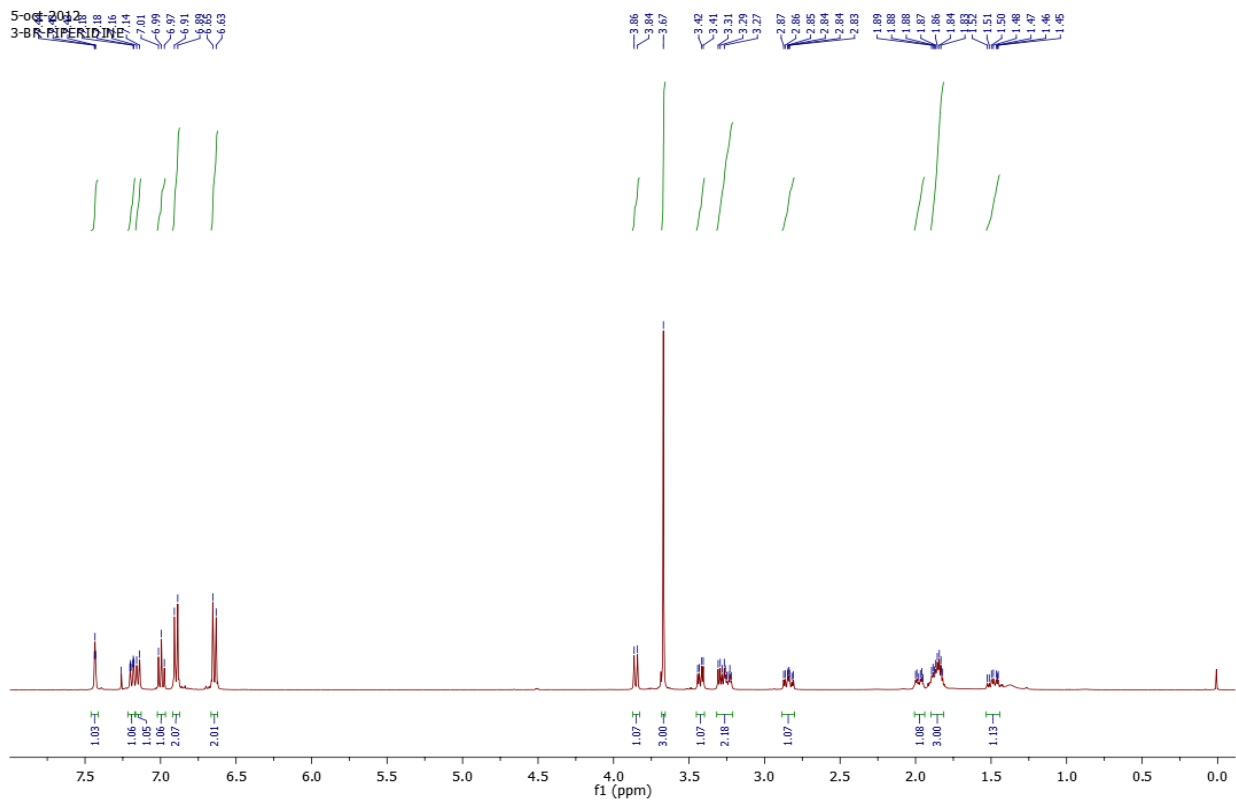

5-oct-2012  
3-BR-PIPERIDINE

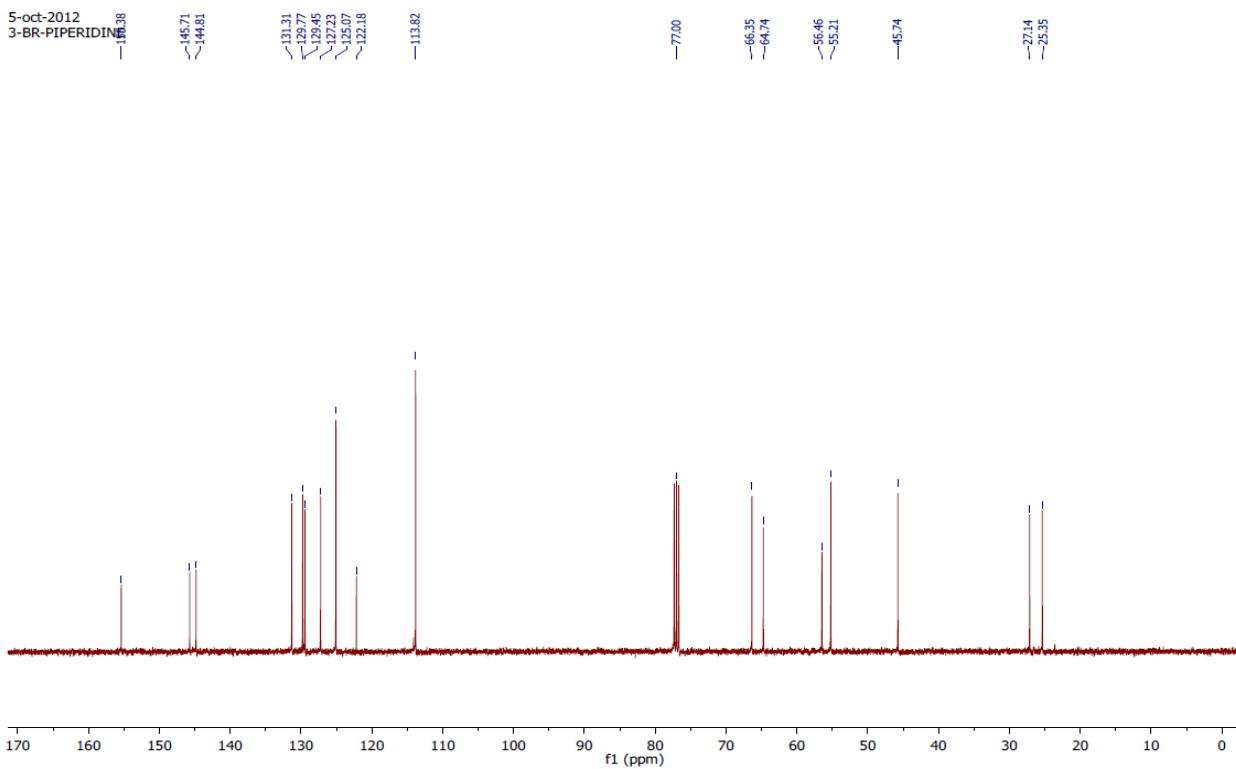

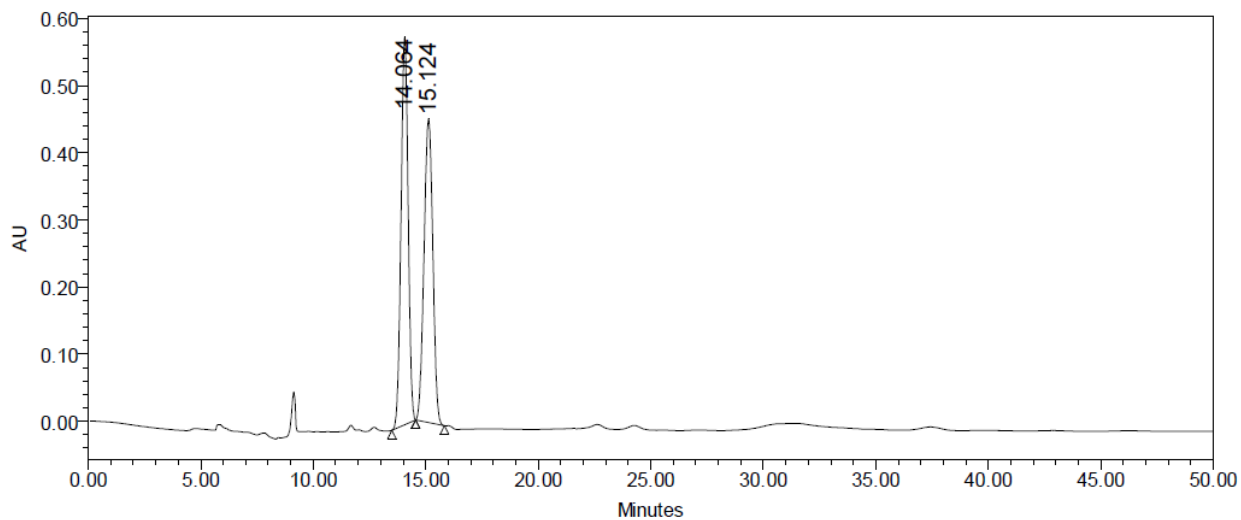

Channel: 2998; Processed Channel: PDA 250.0 nm; Result Id: 1176; Processing Method: 3Br recinic

**Processed Channel Descr.: PDA 250.0 nm**

|   | Processed Channel Descr. | RT     | Area     | % Area | Height |
|---|--------------------------|--------|----------|--------|--------|
| 1 | PDA 250.0 nm             | 14.064 | 12623688 | 50.62  | 578041 |
| 2 | PDA 250.0 nm             | 15.124 | 12313694 | 49.38  | 452875 |

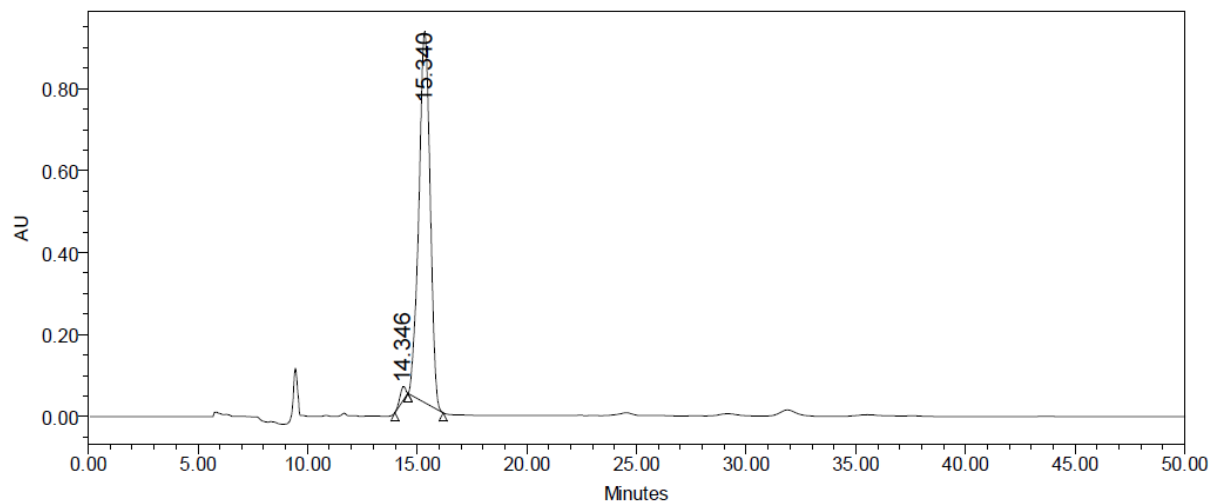

Channel: 2998; Processed Channel: PDA 260.0 nm; Result Id: 1179; Processing Method: 3Br chiral

**Processed Channel Descr.: PDA 260.0 nm**

|   | Processed Channel Descr. | RT     | Area     | % Area | Height |
|---|--------------------------|--------|----------|--------|--------|
| 1 | PDA 260.0 nm             | 14.346 | 579088   | 1.76   | 33521  |
| 2 | PDA 260.0 nm             | 15.340 | 32250417 | 98.24  | 905270 |

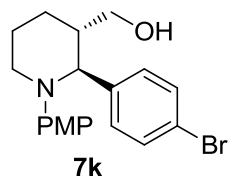

20 AUG  
4-Br-PIPERIDINE

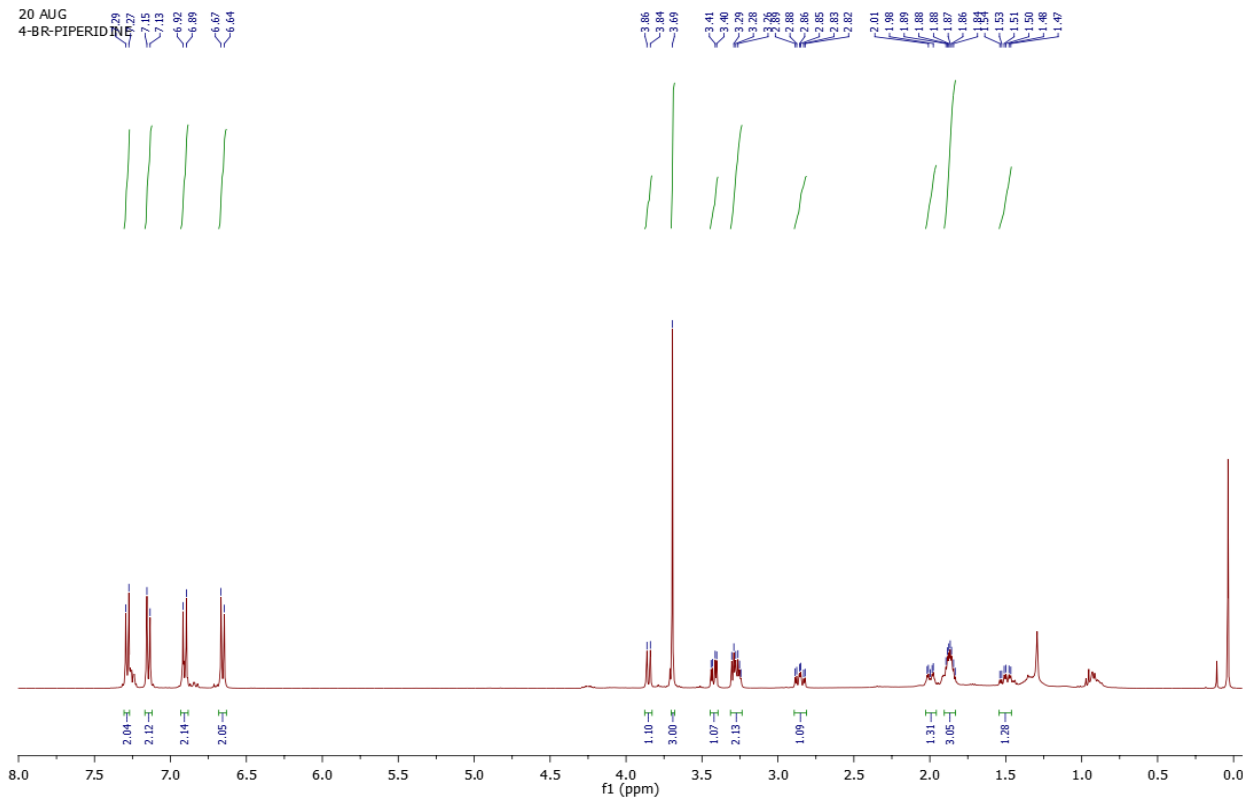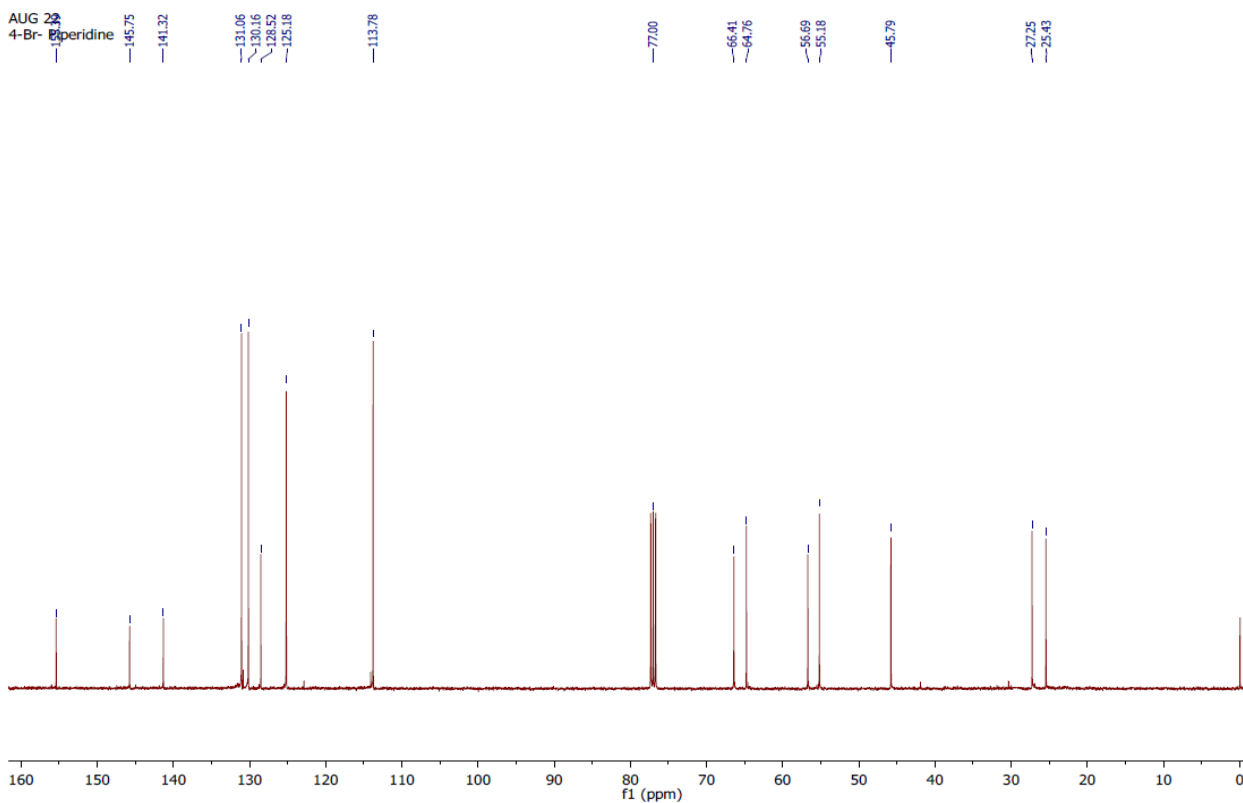

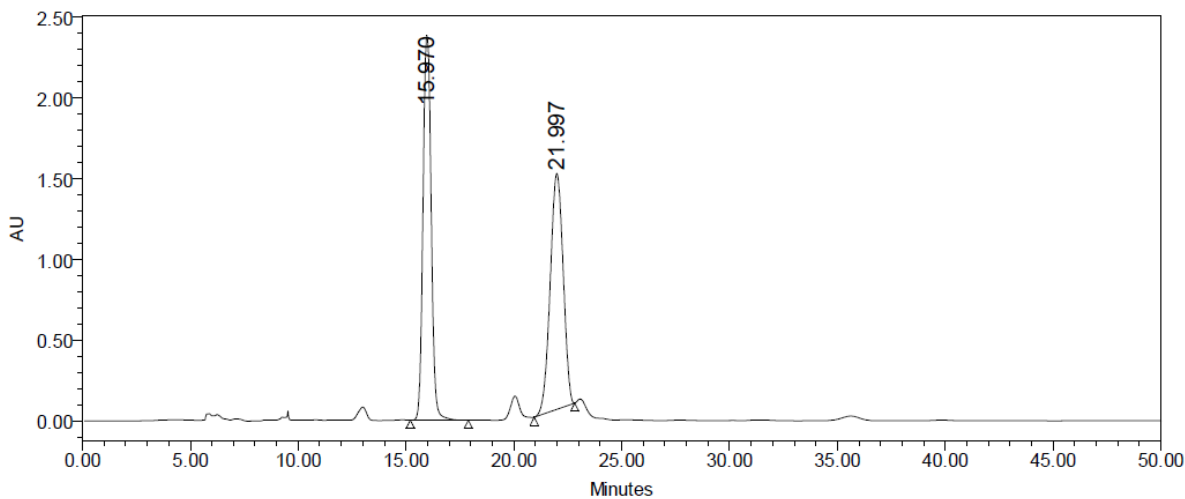

Channel: 2998; Processed Channel: PDA 210.0 nm; Result Id: 1182; Processing Method: 4Br recimic

**Processed Channel Descr.: PDA 210.0 nm**

|   | Processed Channel Descr. | RT     | Area     | % Area | Height  |
|---|--------------------------|--------|----------|--------|---------|
| 1 | PDA 210.0 nm             | 15.970 | 62919860 | 50.76  | 2382945 |
| 2 | PDA 210.0 nm             | 21.997 | 61026592 | 49.24  | 1461711 |

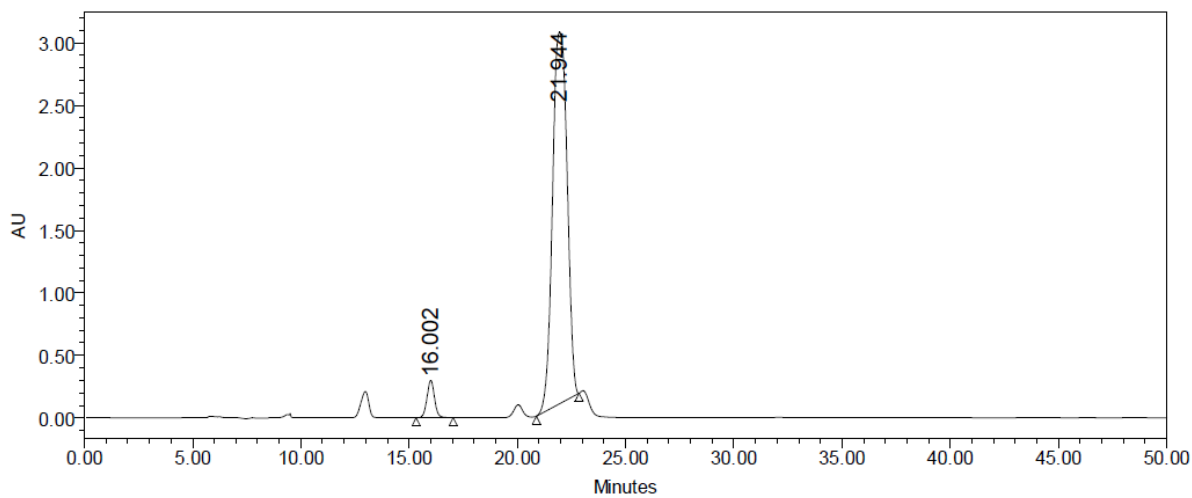

Channel: 2998; Processed Channel: PDA 230.0 nm; Result Id: 1190; Processing Method: 4Br chiral

**Processed Channel Descr.: PDA 230.0 nm**

|   | Processed Channel Descr. | RT     | Area      | % Area | Height  |
|---|--------------------------|--------|-----------|--------|---------|
| 1 | PDA 230.0 nm             | 16.002 | 7184077   | 4.90   | 298653  |
| 2 | PDA 230.0 nm             | 21.944 | 139363498 | 95.10  | 2975530 |

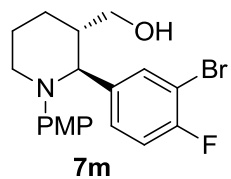

20 ALK  
3 BR 4 F PIPERIDINE

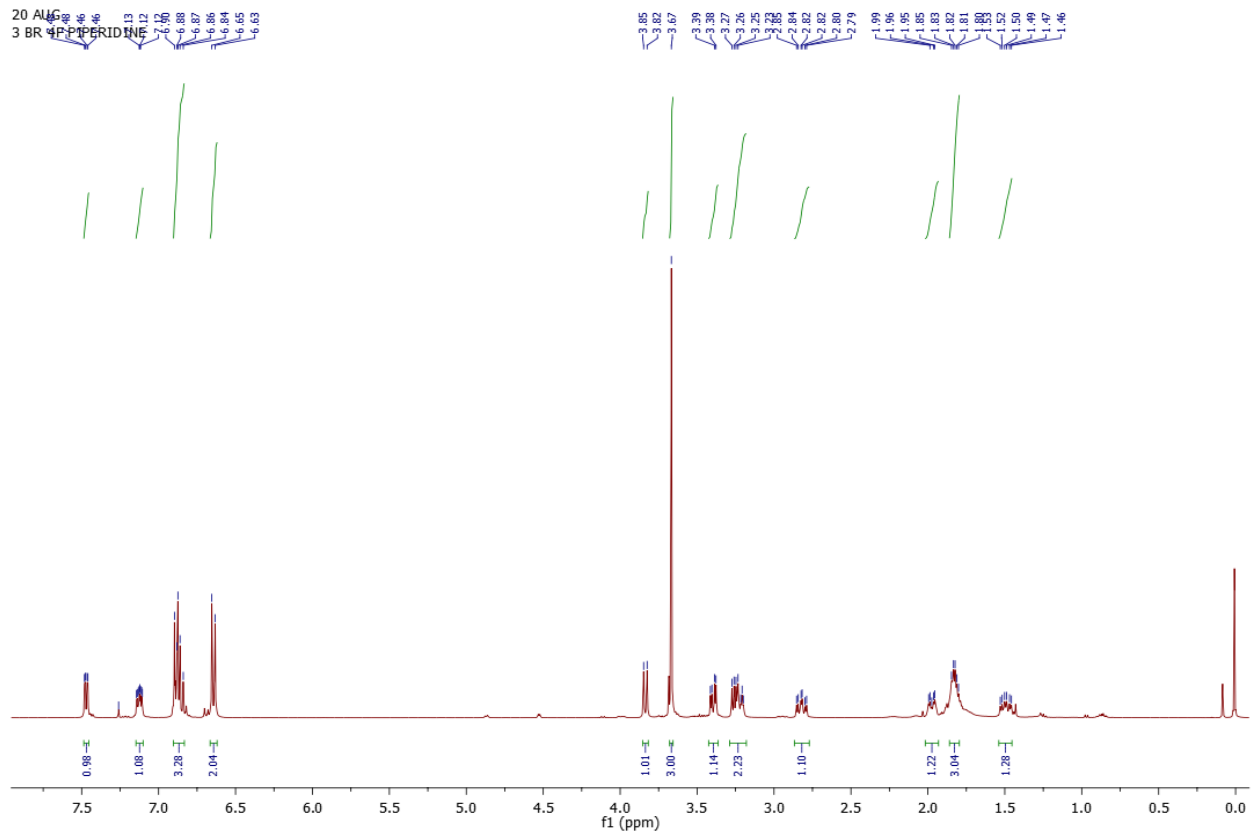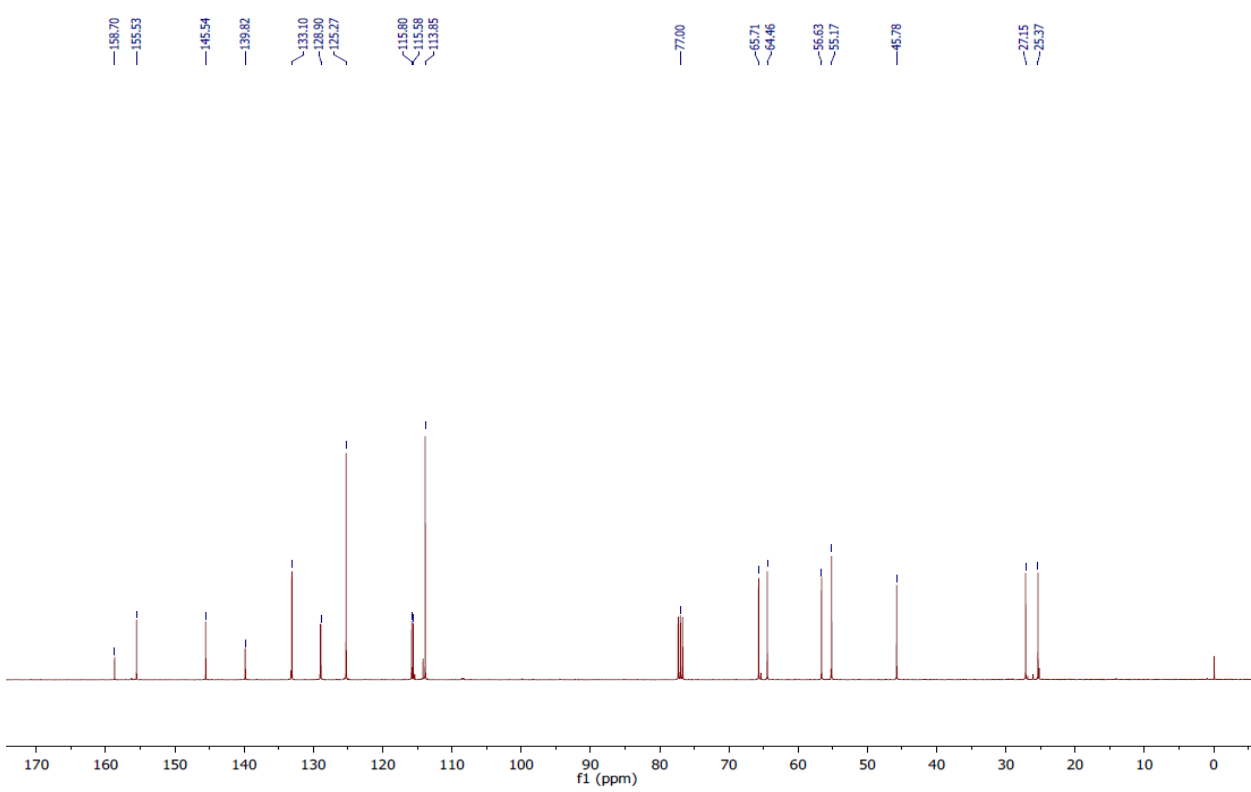

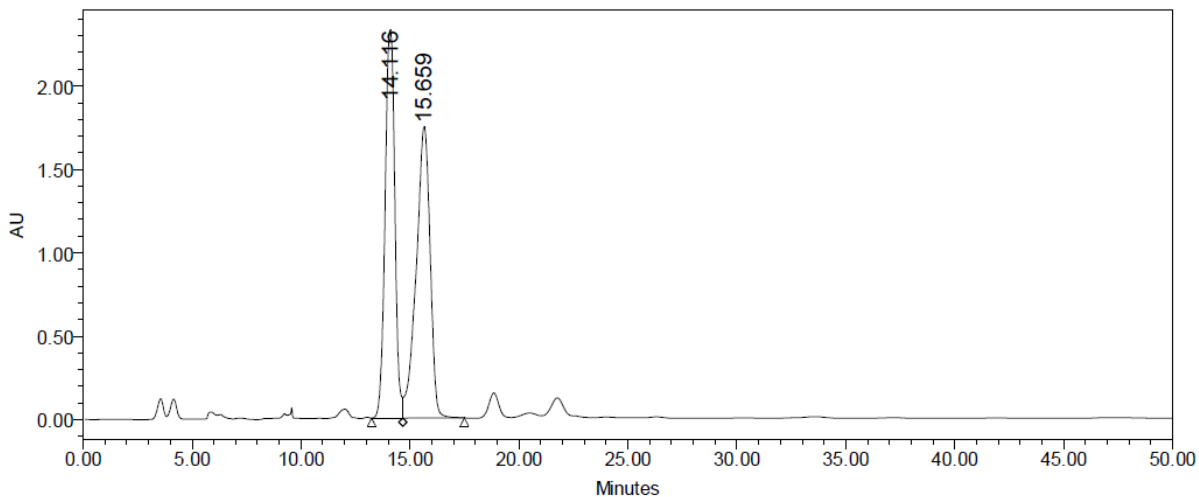

Channel: 2998; Processed Channel: PDA 210.0 nm; Result Id: 1354; Processing Method: 3Br 4F recemic

**Processed Channel Descr.: PDA 210.0 nm**

|   | Processed Channel Descr. | RT     | Area     | % Area | Height  |
|---|--------------------------|--------|----------|--------|---------|
| 1 | PDA 210.0 nm             | 14.116 | 72261566 | 48.16  | 2326788 |
| 2 | PDA 210.0 nm             | 15.659 | 77791436 | 51.84  | 1748527 |

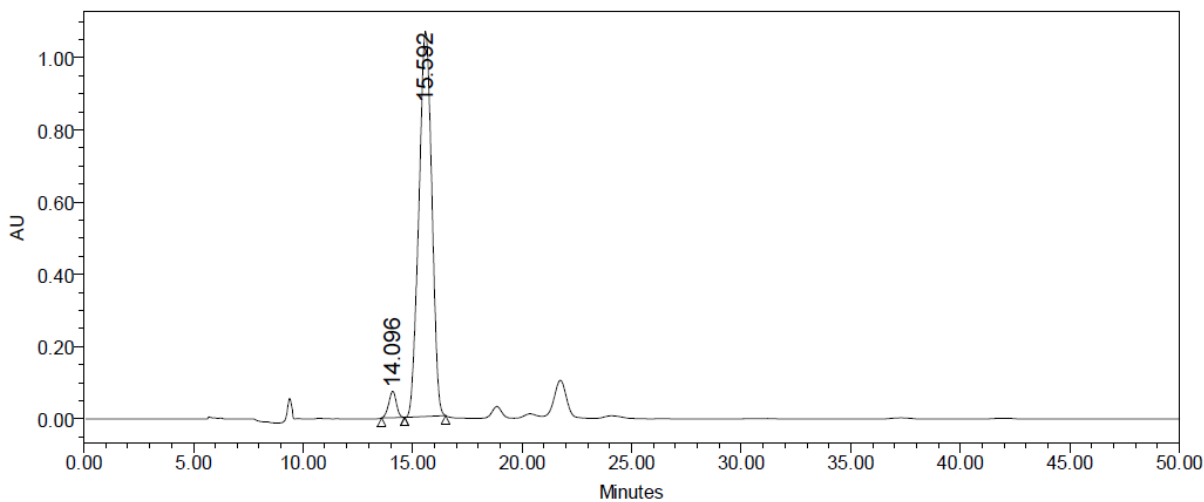

Channel: 2998; Processed Channel: PDA 300.0 nm; Result Id: 1362; Processing Method: 3Br 4F chiral

**Processed Channel Descr.: PDA 300.0 nm**

|   | Processed Channel Descr. | RT     | Area     | % Area | Height  |
|---|--------------------------|--------|----------|--------|---------|
| 1 | PDA 300.0 nm             | 14.096 | 1772320  | 3.89   | 73342   |
| 2 | PDA 300.0 nm             | 15.592 | 43750015 | 96.11  | 1066251 |



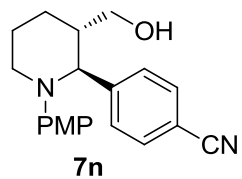

20 AUG  
4-CN-PIPERIDINE

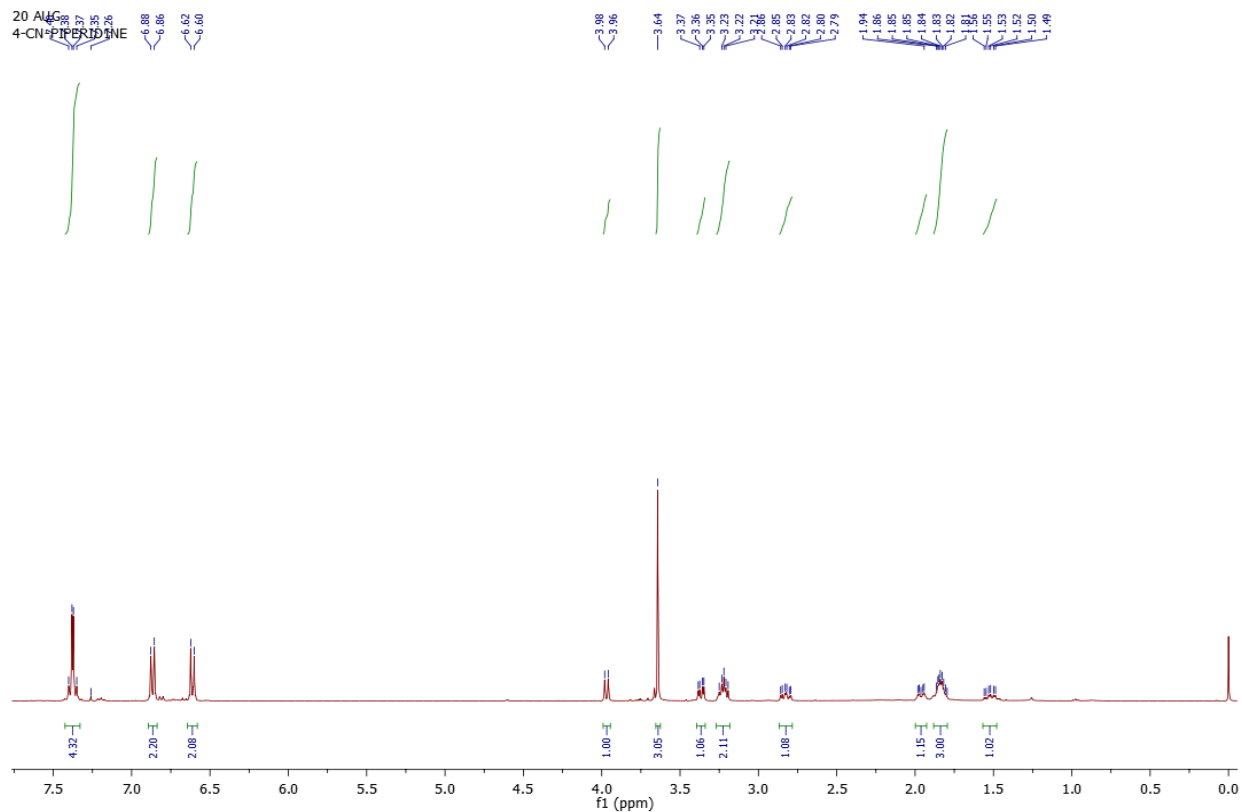

20 AUG  
4-CN PIPERIDINE

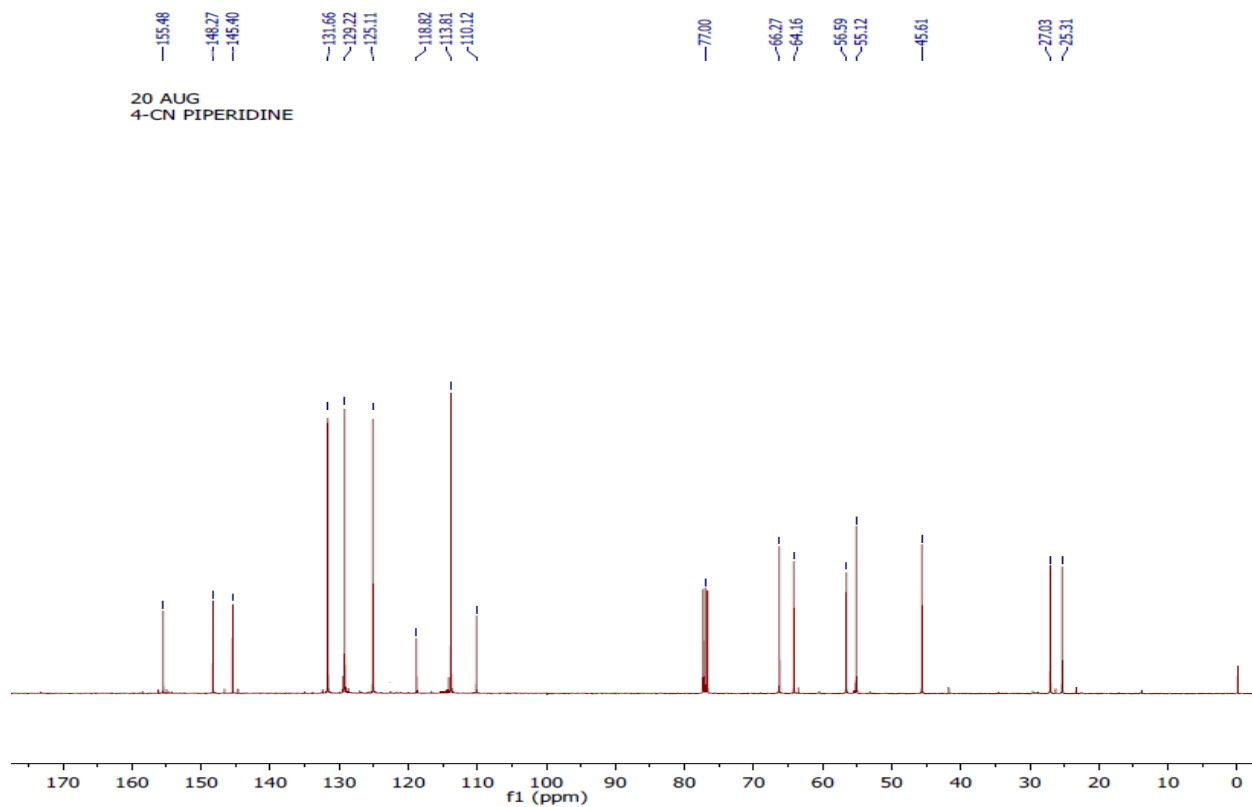

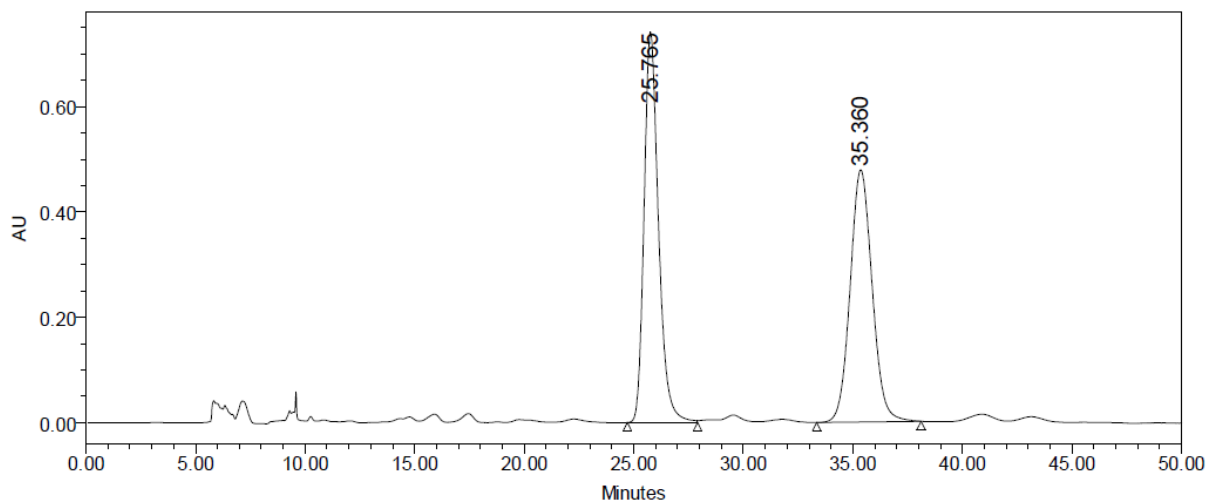

Channel: 2998; Processed Channel: PDA 210.0 nm; Result Id: 1374; Processing Method: 4CN recenic

**Processed Channel Descr.: PDA 210.0 nm**

|   | Processed Channel Descr. | RT     | Area     | % Area | Height |
|---|--------------------------|--------|----------|--------|--------|
| 1 | PDA 210.0 nm             | 25.765 | 33880253 | 50.36  | 740836 |
| 2 | PDA 210.0 nm             | 35.360 | 33396864 | 49.64  | 478314 |

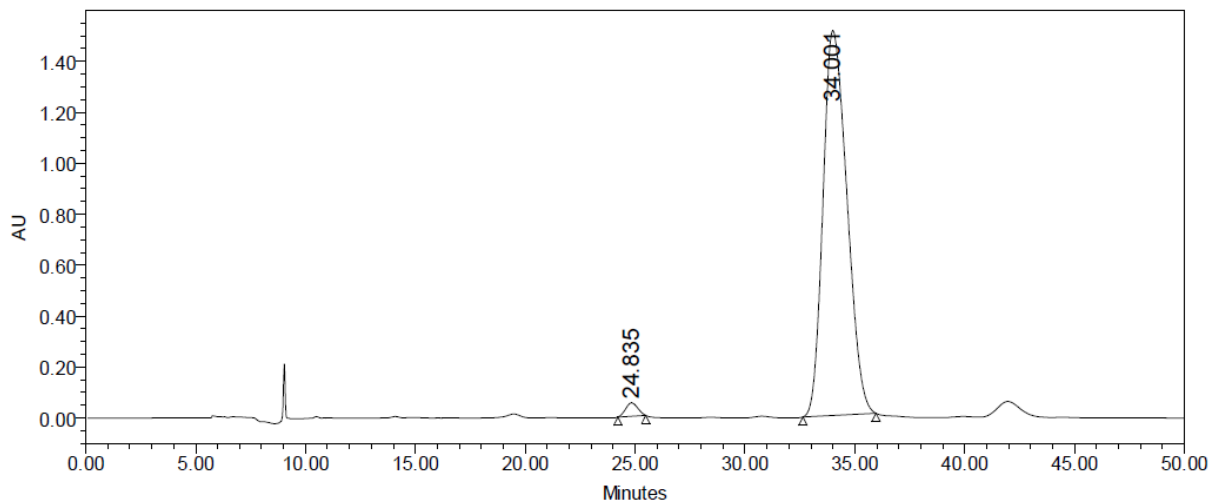

Channel: 2998; Processed Channel: PDA 280.0 nm; Result Id: 1382; Processing Method: 4CN chiral

**Processed Channel Descr.: PDA 280.0 nm**

|   | Processed Channel Descr. | RT     | Area      | % Area | Height  |
|---|--------------------------|--------|-----------|--------|---------|
| 1 | PDA 280.0 nm             | 24.835 | 2000805   | 1.72   | 52418   |
| 2 | PDA 280.0 nm             | 34.001 | 114332670 | 98.28  | 1510719 |

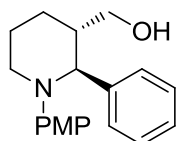

**7o**

5-oct-2012  
BENZALDEHYDE PIPERIDINE

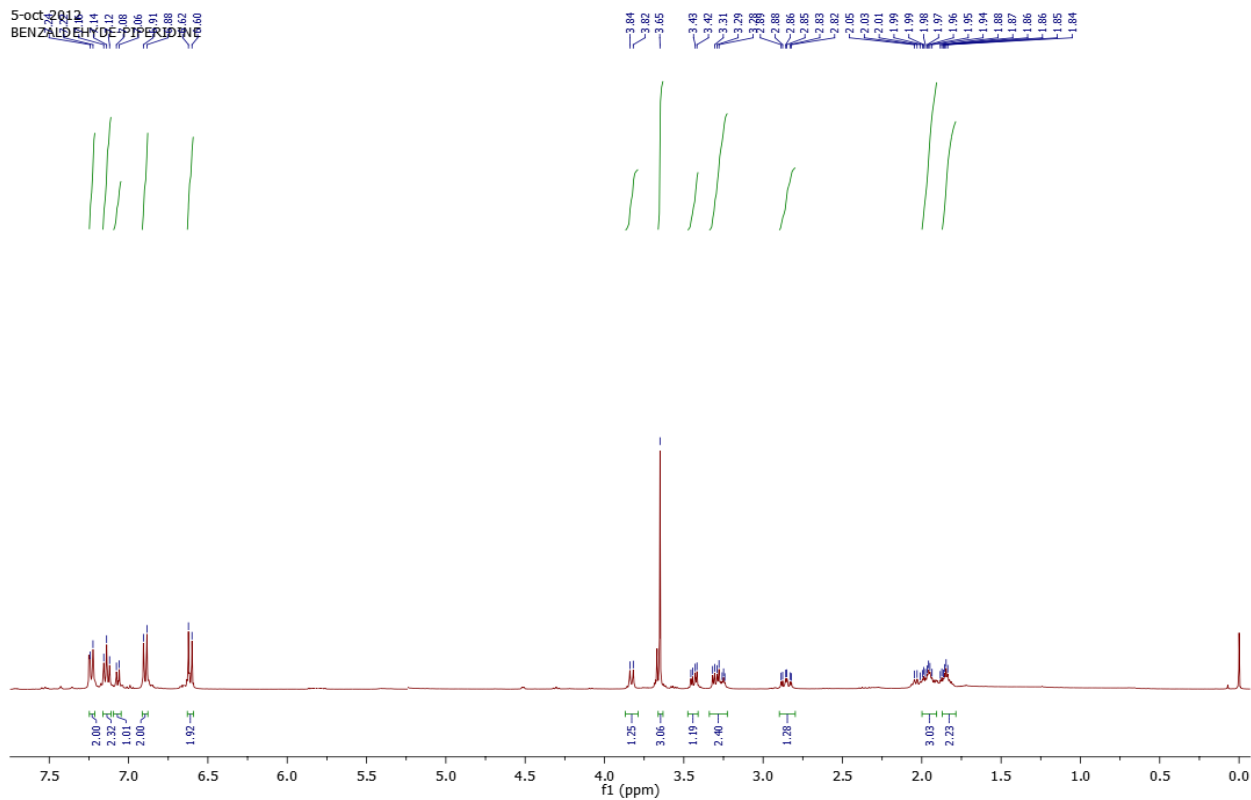

5-oct-2012  
BENZALDEHYDE PIPERIDINE

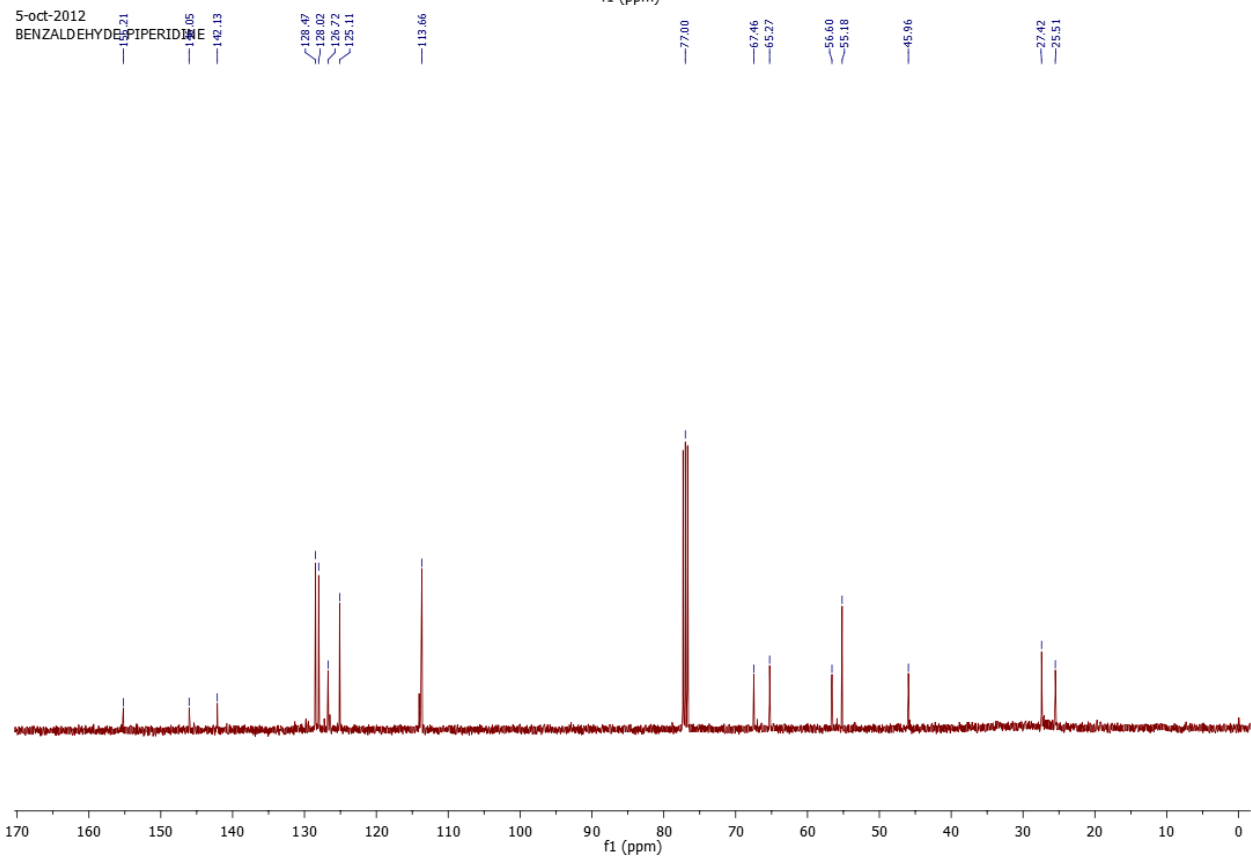

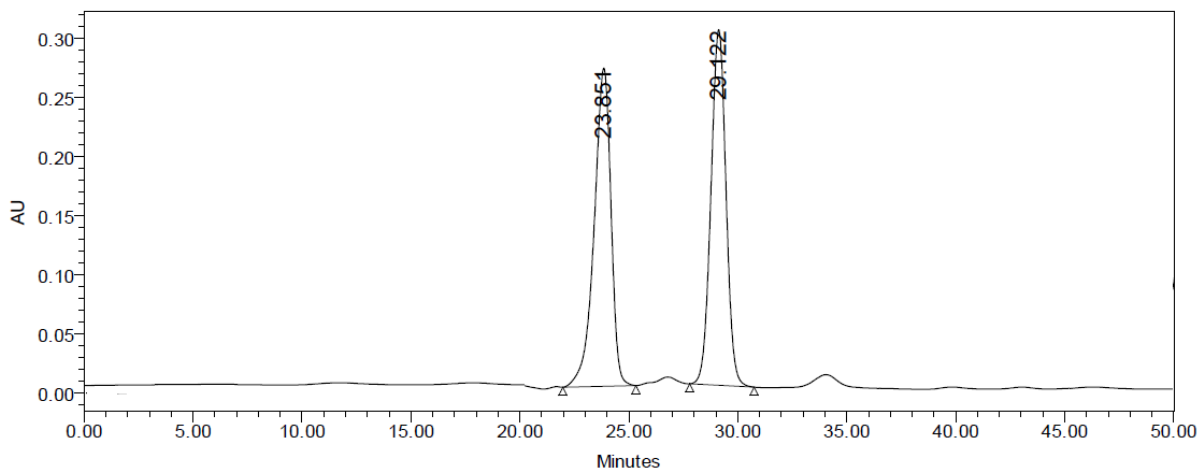

Channel: 2998; Processed Channel: PDA 250.0 nm; Result Id: 1832; Processing Method: benzaldehyde piperidin recemic

**Processed Channel Descr.: PDA 250.0 nm**

|   | Processed Channel Descr. | RT     | Area     | % Area | Height |
|---|--------------------------|--------|----------|--------|--------|
| 1 | PDA 250.0 nm             | 23.851 | 14442485 | 50.00  | 268633 |
| 2 | PDA 250.0 nm             | 29.122 | 14444325 | 50.00  | 300286 |

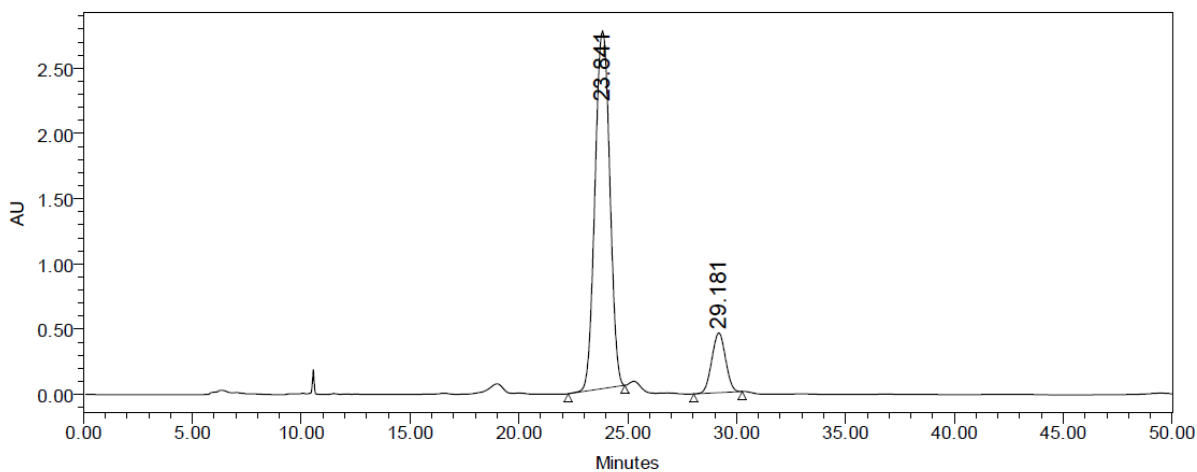

Channel: 2998; Processed Channel: PDA 250.0 nm; Result Id: 1835; Processing Method: benzaldehyde piperidine chiral

**Processed Channel Descr.: PDA 250.0 nm**

|   | Processed Channel Descr. | RT     | Area      | % Area | Height  |
|---|--------------------------|--------|-----------|--------|---------|
| 1 | PDA 250.0 nm             | 23.841 | 129693361 | 86.62  | 2742504 |
| 2 | PDA 250.0 nm             | 29.181 | 20030020  | 13.38  | 457400  |

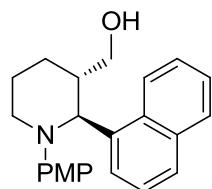

**7p**

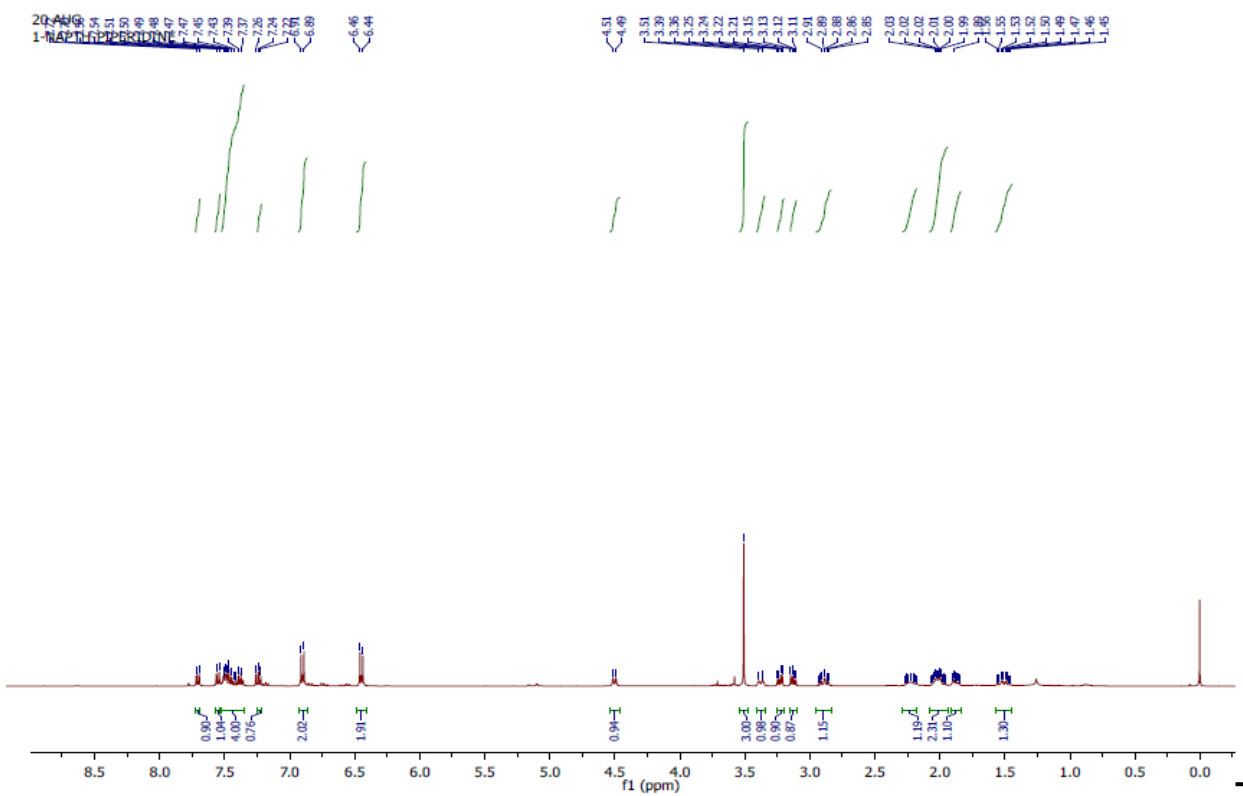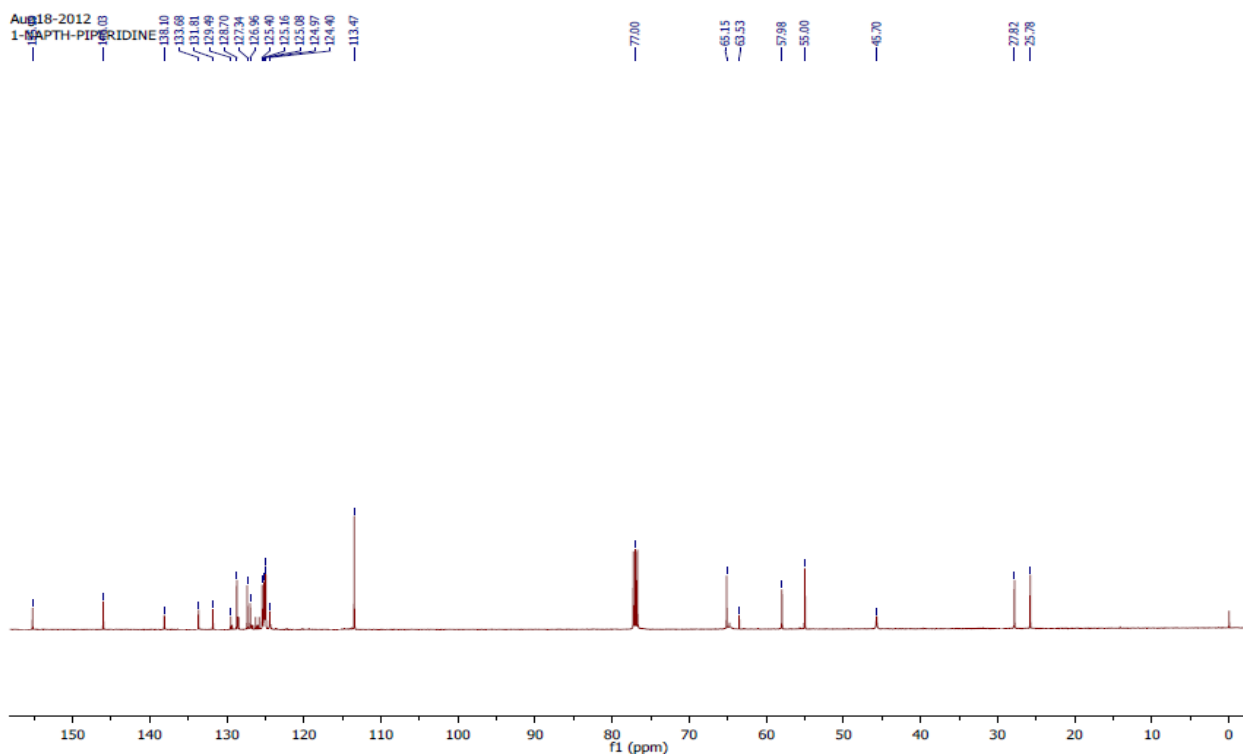

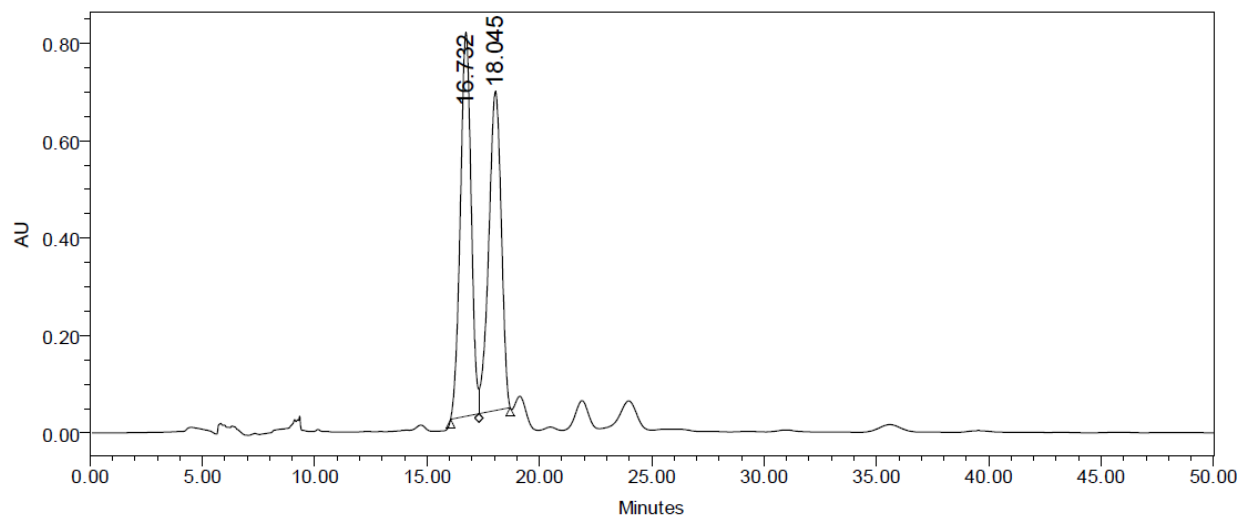

Channel: 2998; Processed Channel: PDA 230.0 nm; Result Id: 1407; Processing Method: 1 naphthyl recemic

**Processed Channel Descr.: PDA 230.0 nm**

|   | Processed Channel Descr. | RT     | Area     | % Area | Height |
|---|--------------------------|--------|----------|--------|--------|
| 1 | PDA 230.0 nm             | 16.732 | 26237147 | 50.86  | 788448 |
| 2 | PDA 230.0 nm             | 18.045 | 25349306 | 49.14  | 655280 |

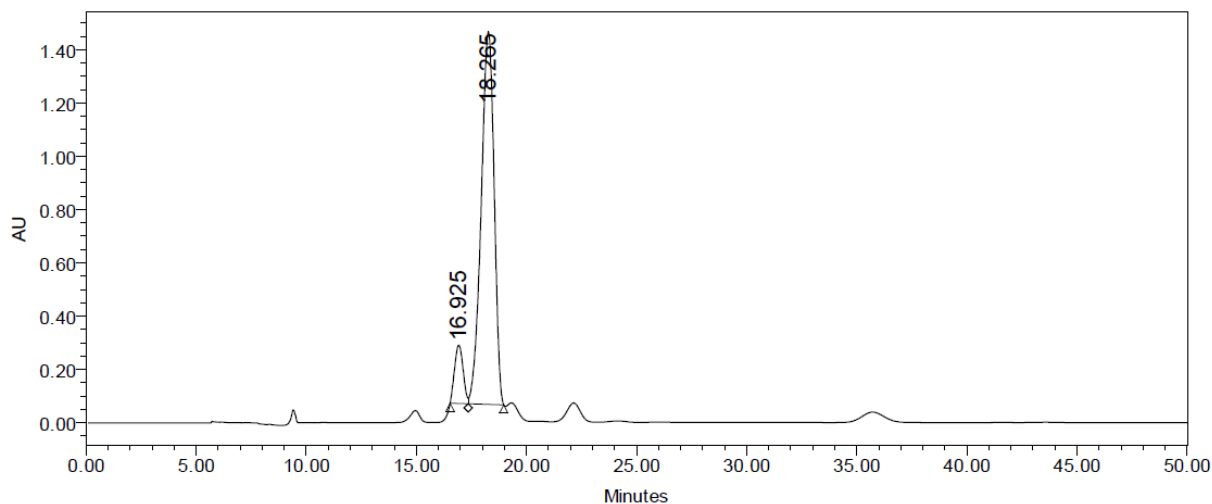

Channel: 2998; Processed Channel: PDA 290.0 nm; Result Id: 1410; Processing Method: 1naphthyl chiral

**Processed Channel Descr.: PDA 290.0 nm**

|   | Processed Channel Descr. | RT     | Area     | % Area | Height  |
|---|--------------------------|--------|----------|--------|---------|
| 1 | PDA 290.0 nm             | 16.925 | 5896654  | 9.37   | 218962  |
| 2 | PDA 290.0 nm             | 18.265 | 57024549 | 90.63  | 1398623 |

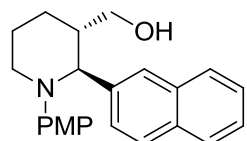

7q

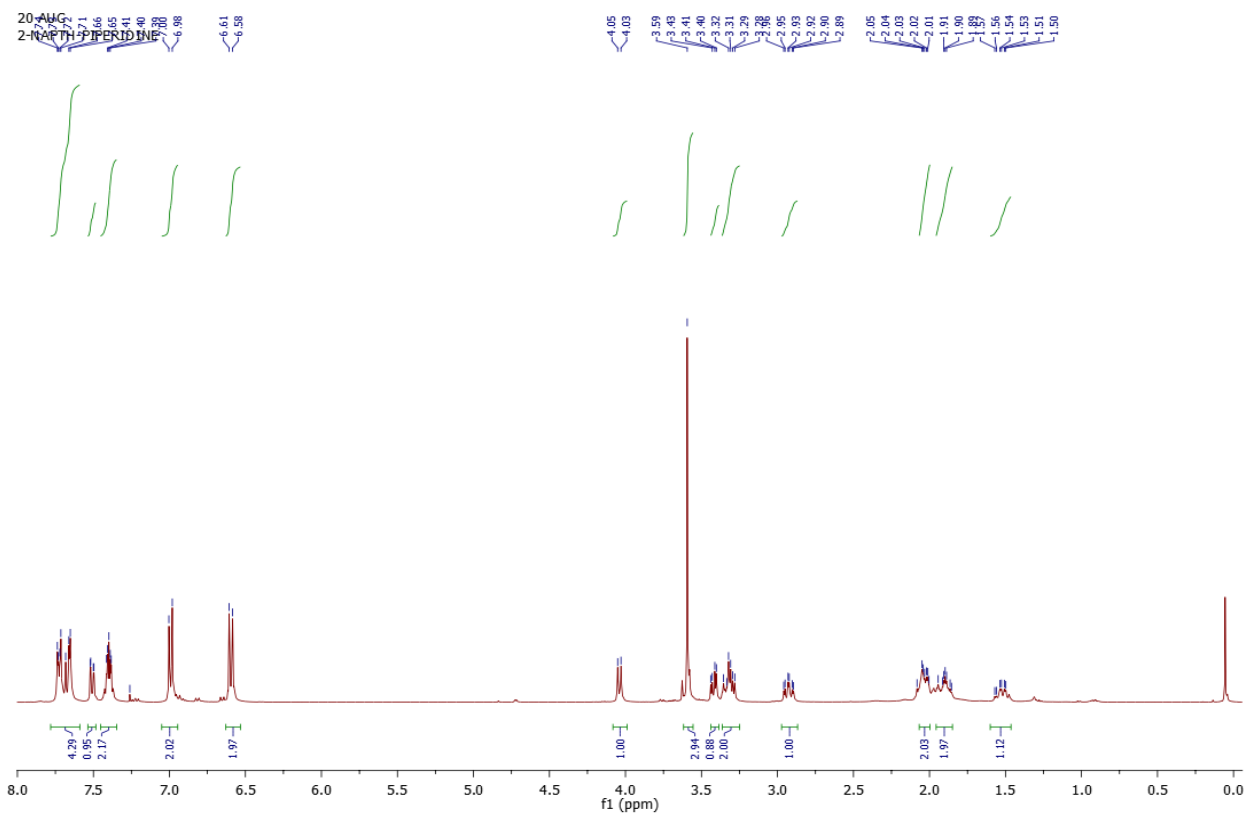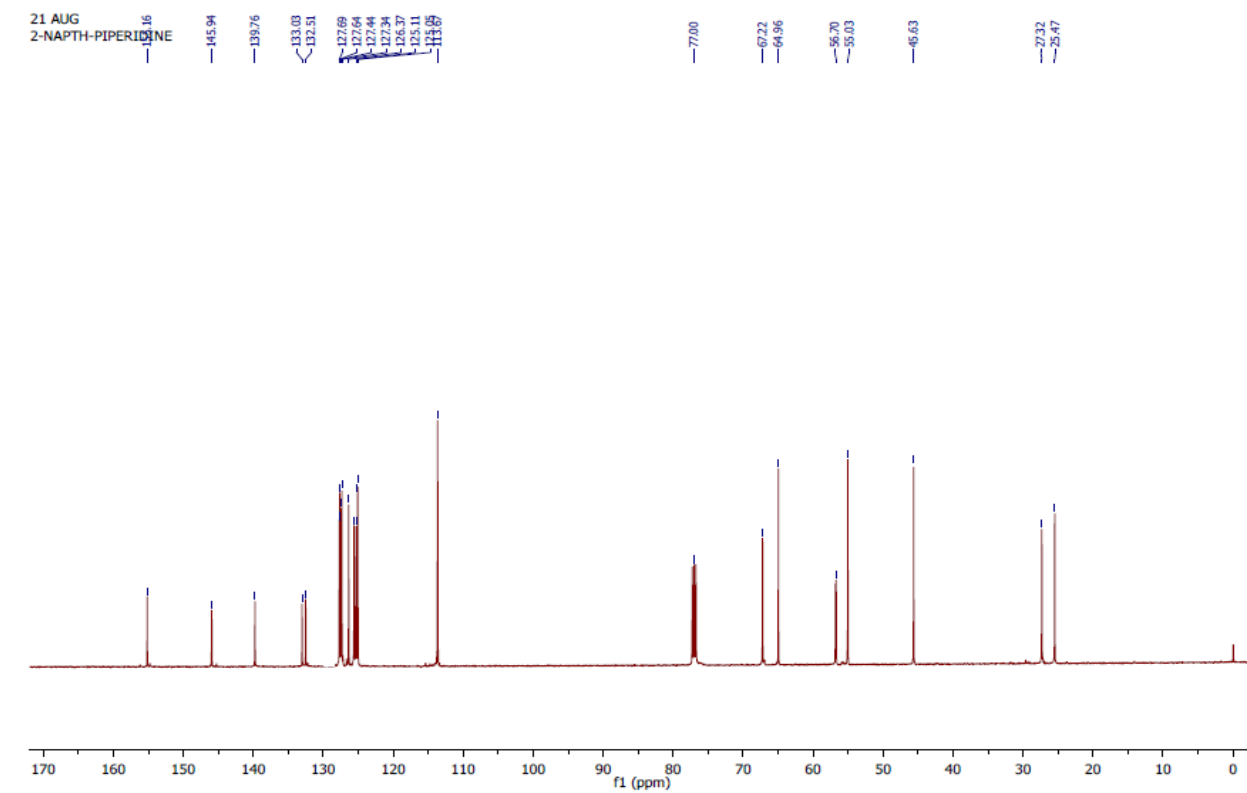

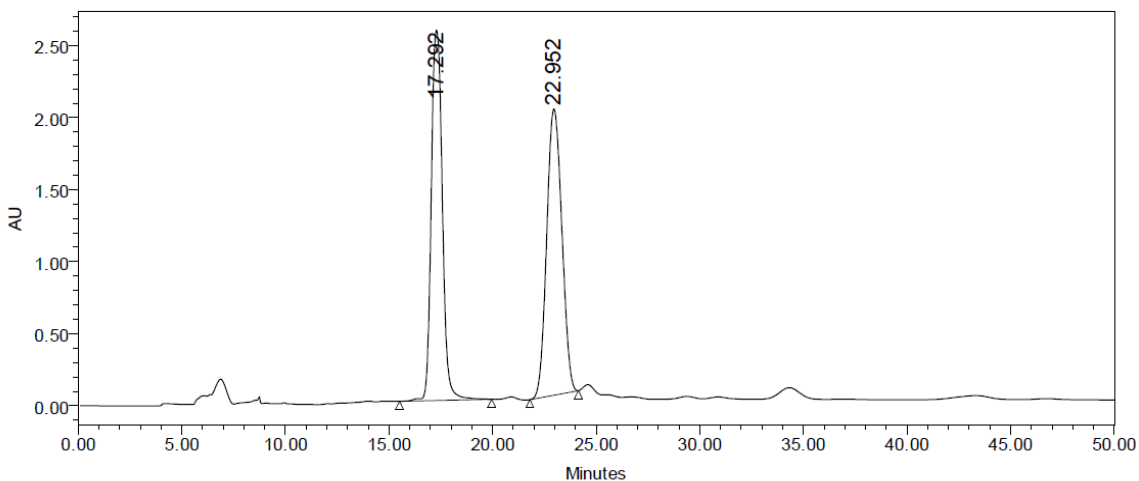

Channel: 2998; Processed Channel: PDA 230.0 nm; Result Id: 1401; Processing Method: 2Naphthyl recemic

**Processed Channel Descr.: PDA 230.0 nm**

|   | Processed Channel Descr. | RT     | Area      | % Area | Height  |
|---|--------------------------|--------|-----------|--------|---------|
| 1 | PDA 230.0 nm             | 17.292 | 95518095  | 48.59  | 2568272 |
| 2 | PDA 230.0 nm             | 22.952 | 101065210 | 51.41  | 1985987 |

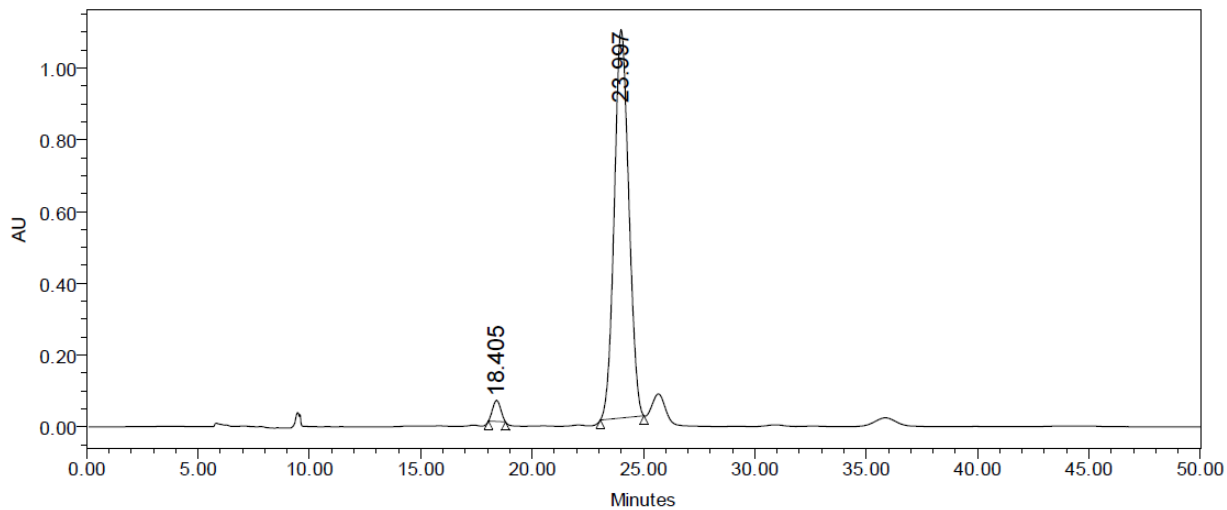

Channel: 2998; Processed Channel: PDA 250.0 nm; Result Id: 1404; Processing Method: 2 naphthyl chiral

**Processed Channel Descr.: PDA 250.0 nm**

|   | Processed Channel Descr. | RT     | Area     | % Area | Height  |
|---|--------------------------|--------|----------|--------|---------|
| 1 | PDA 250.0 nm             | 18.405 | 1444392  | 2.85   | 58190   |
| 2 | PDA 250.0 nm             | 23.997 | 49201125 | 97.15  | 1082335 |



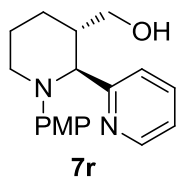

5-oct-2012  
PYRIDINE-2-PIPERIDINE

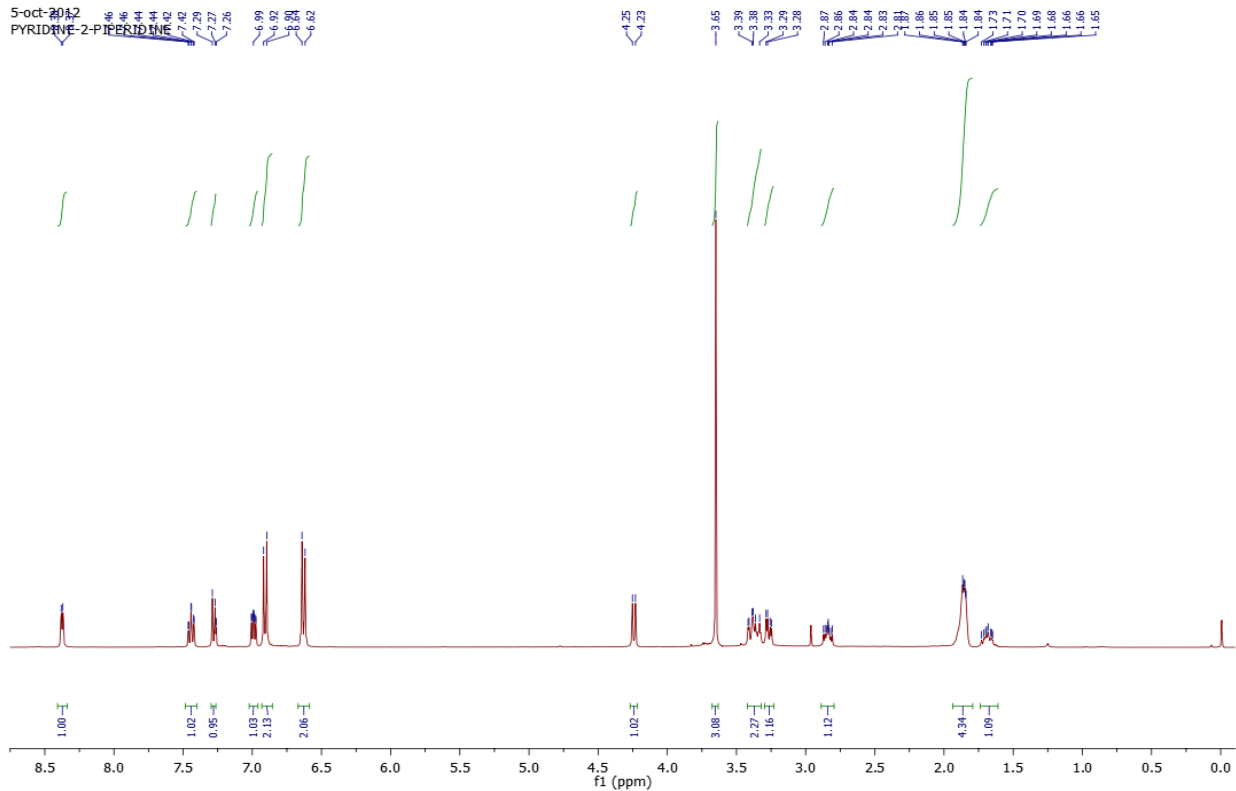

5-oct-2012  
PYRIDINE-2-PIPERIDINE

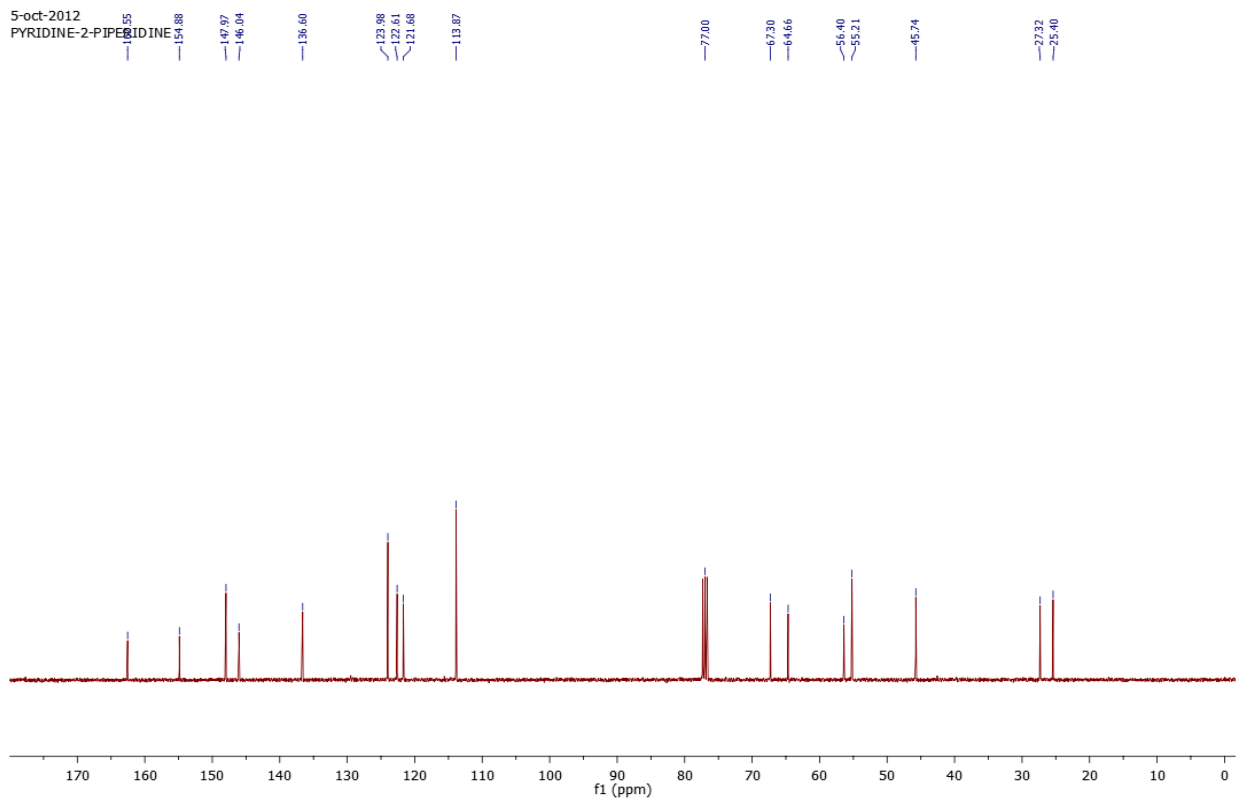

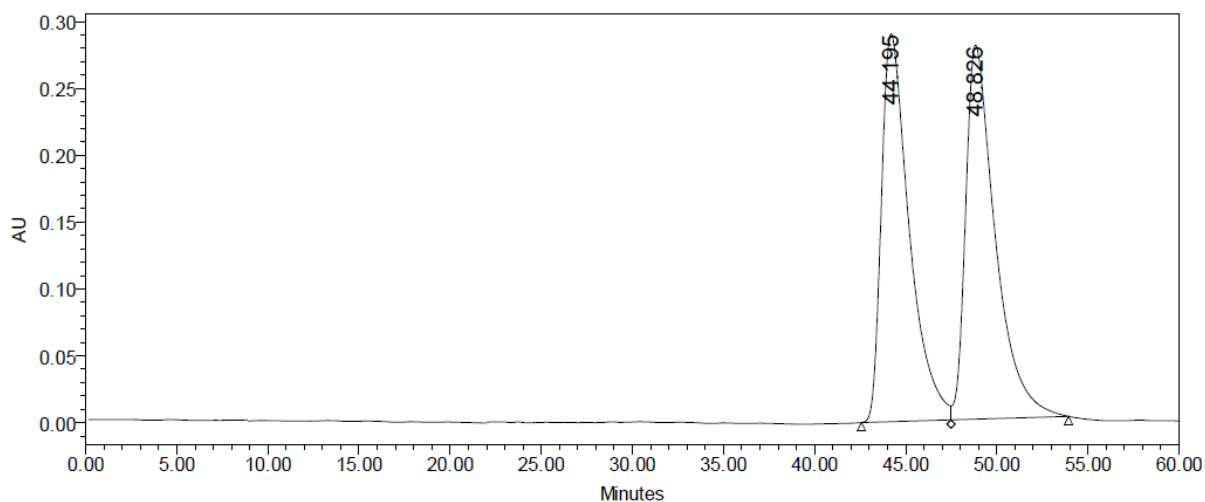

Channel: 2998; Processed Channel: PDA 260.0 nm; Result Id: 1446; Processing Method: 2py recenic

**Processed Channel Descr.: PDA 260.0 nm**

|   | Processed Channel Descr. | RT     | Area     | % Area | Height |
|---|--------------------------|--------|----------|--------|--------|
| 1 | PDA 260.0 nm             | 44.195 | 30800114 | 49.32  | 289968 |
| 2 | PDA 260.0 nm             | 48.826 | 31652637 | 50.68  | 279761 |

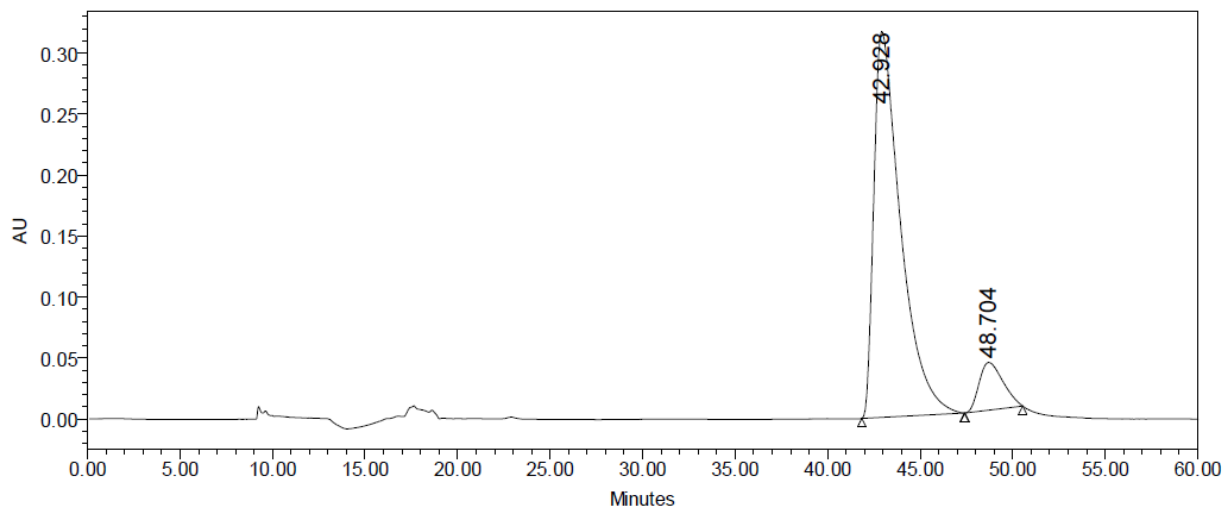

Channel: 2998; Processed Channel: PDA 290.0 nm; Result Id: 1449; Processing Method: 2py chiral

**Processed Channel Descr.: PDA 290.0 nm**

|   | Processed Channel Descr. | RT     | Area     | % Area | Height |
|---|--------------------------|--------|----------|--------|--------|
| 1 | PDA 290.0 nm             | 42.928 | 31851581 | 90.11  | 316302 |
| 2 | PDA 290.0 nm             | 48.704 | 3497525  | 9.89   | 39140  |

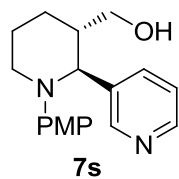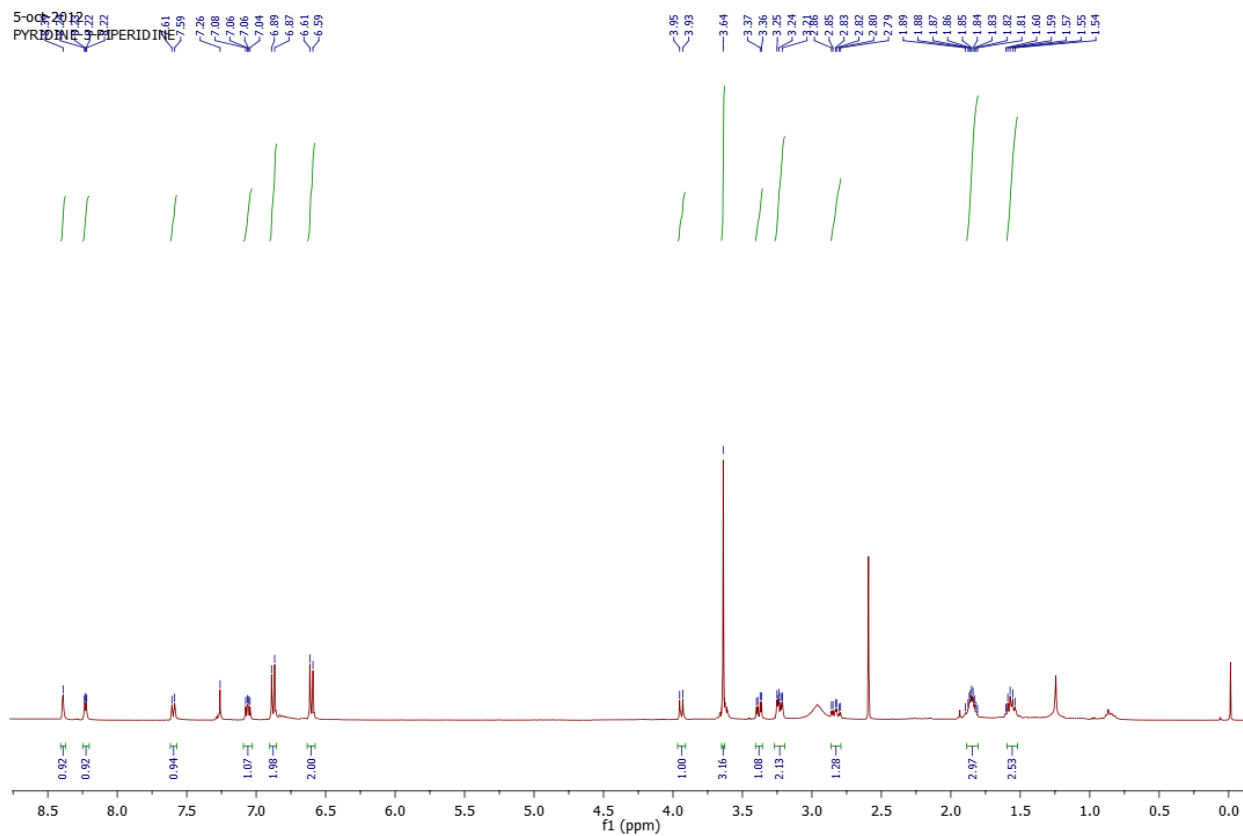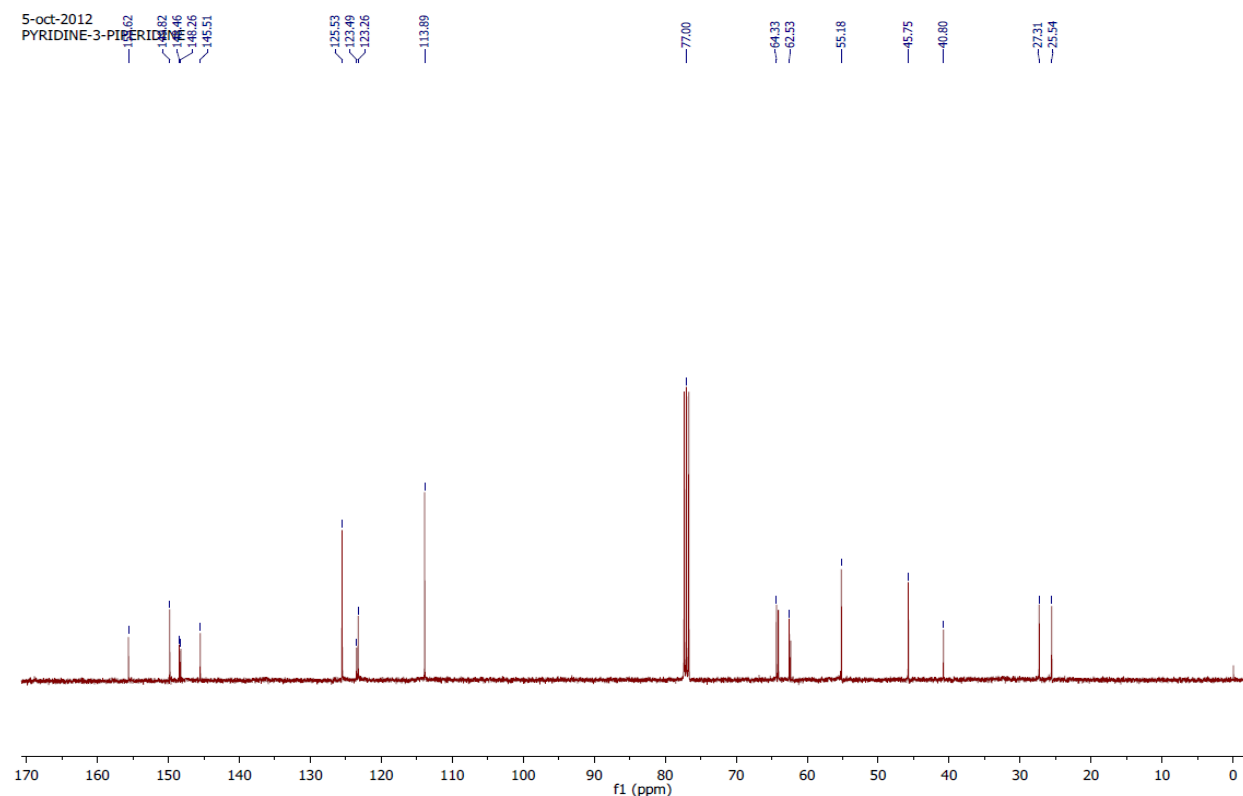

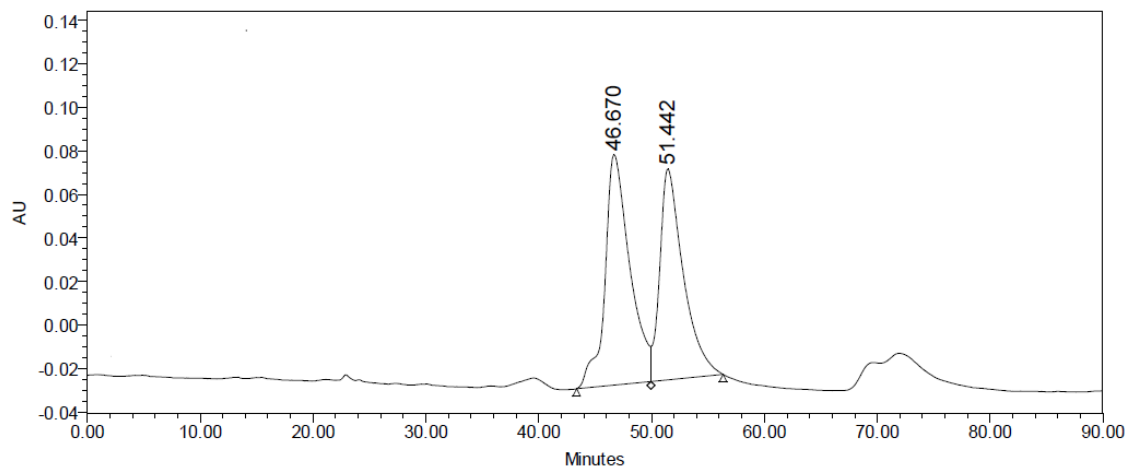

Channel: 2998; Processed Channel: PDA 260.0 nm; Result Id: 1573; Processing Method: 2py receric

**Processed Channel Descr.: PDA 260.0 nm**

|   | Processed Channel Descr. | RT     | Area     | % Area | Height |
|---|--------------------------|--------|----------|--------|--------|
| 1 | PDA 260.0 nm             | 46.670 | 16280969 | 53.64  | 105934 |
| 2 | PDA 260.0 nm             | 51.442 | 14069615 | 46.36  | 96924  |

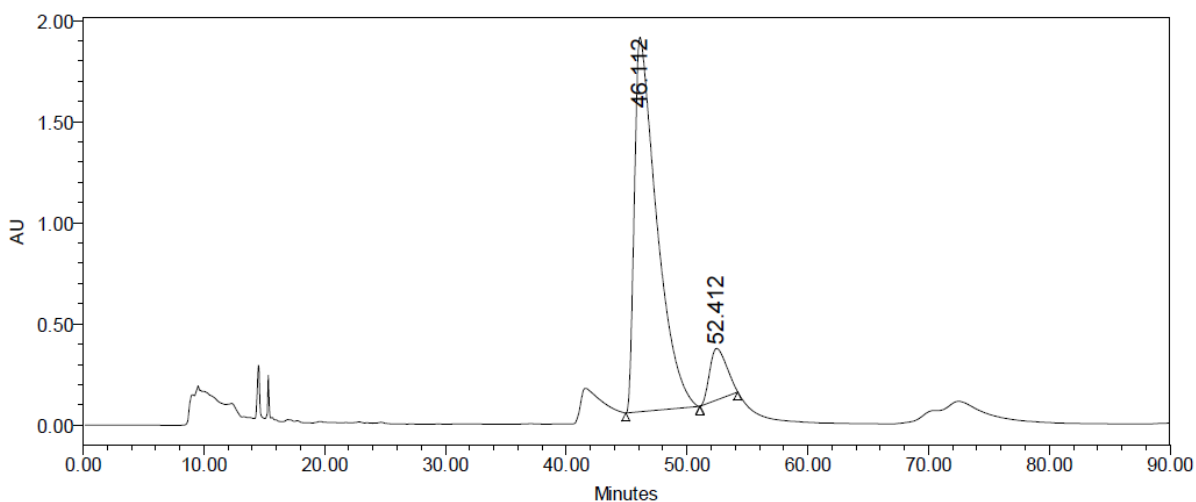

Channel: 2998; Processed Channel: PDA 250.0 nm; Result Id: 1577; Processing Method: 3py chiral

**Processed Channel Descr.: PDA 250.0 nm**

|   | Processed Channel Descr. | RT     | Area      | % Area | Height  |
|---|--------------------------|--------|-----------|--------|---------|
| 1 | PDA 250.0 nm             | 46.112 | 237643292 | 90.66  | 1849388 |
| 2 | PDA 250.0 nm             | 52.412 | 24480511  | 9.34   | 255082  |

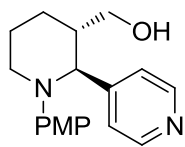

20 AUG  
4 PYRIDINE PIPERIDINE

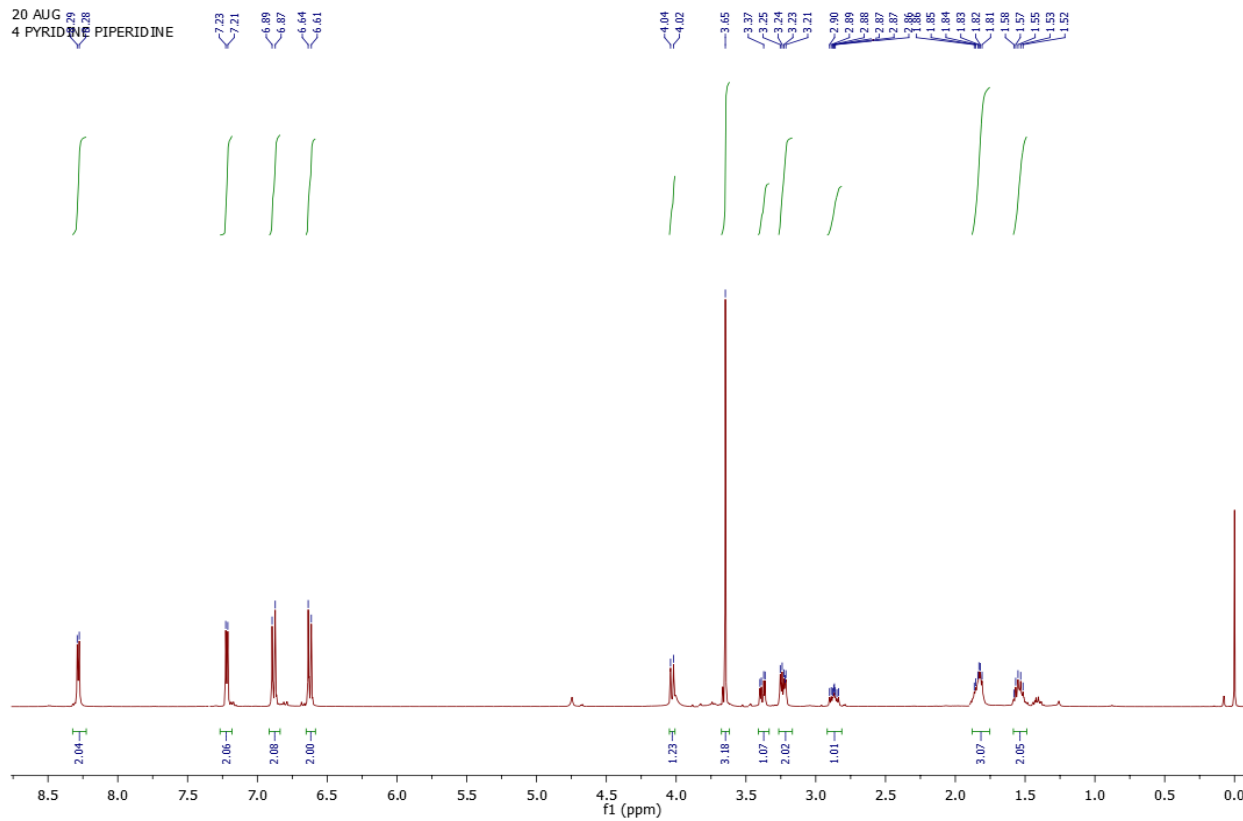

21 AUG  
4 Pyridine Piperidine

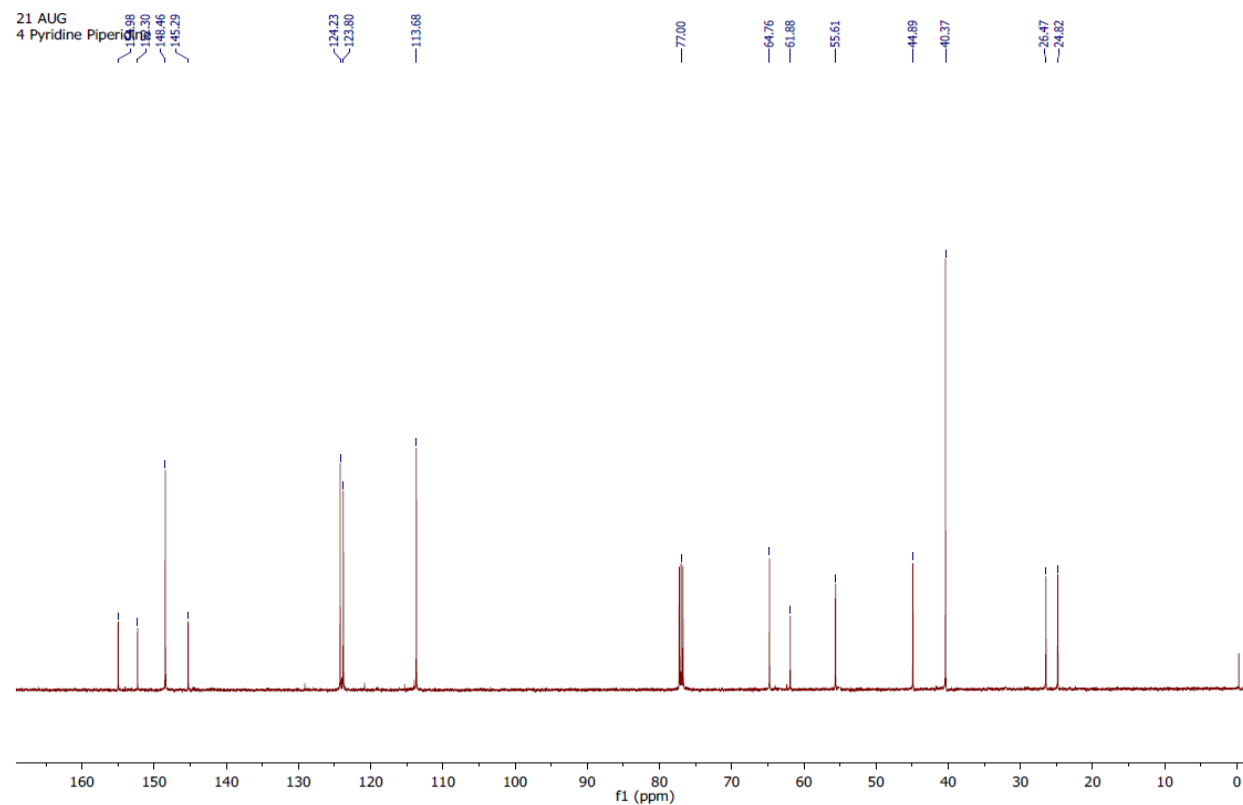

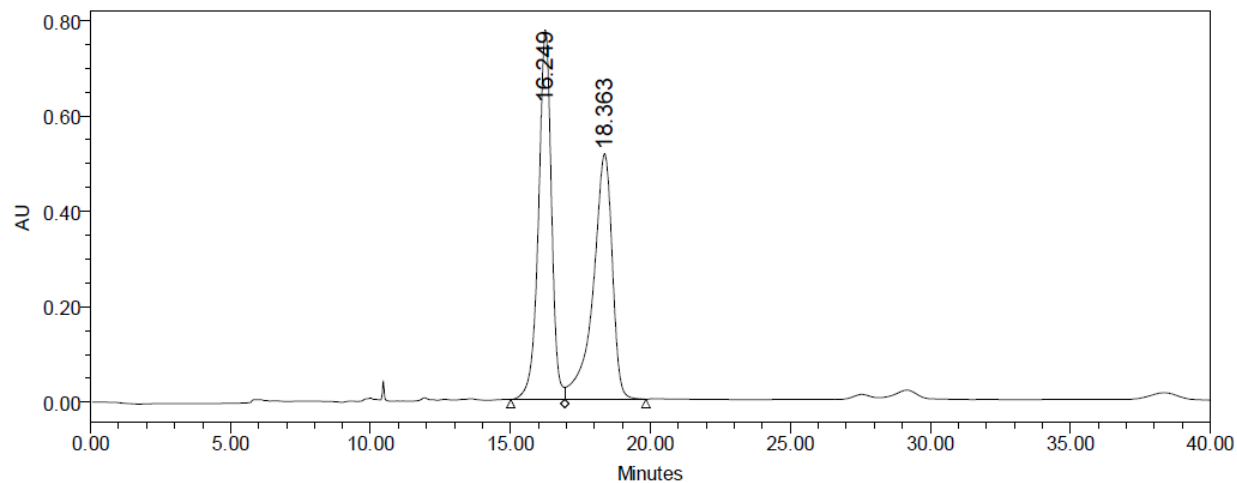

Channel: 2998; Processed Channel: PDA 250.0 nm; Result Id: 2020; Processing Method: 4py piperidine recemic

**Processed Channel Descr.: PDA 250.0 nm**

|   | Processed Channel Descr. | RT     | Area     | % Area | Height |
|---|--------------------------|--------|----------|--------|--------|
| 1 | PDA 250.0 nm             | 16.249 | 24850155 | 50.43  | 774140 |
| 2 | PDA 250.0 nm             | 18.363 | 24425729 | 49.57  | 514434 |

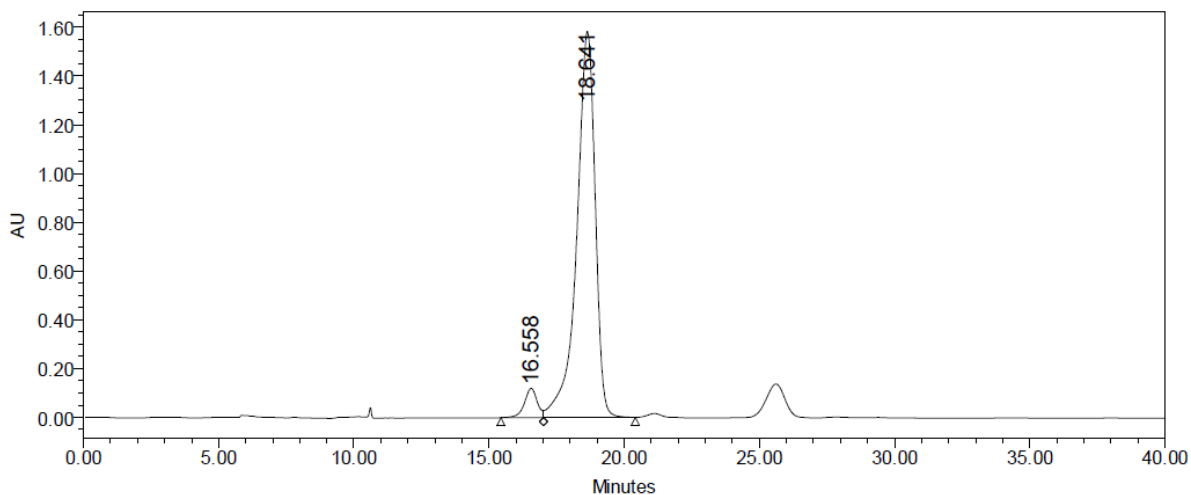

Channel: 2998; Processed Channel: PDA 250.0 nm; Result Id: 1988; Processing Method: 4py piperidin chiral

**Processed Channel Descr.: PDA 250.0 nm**

|   | Processed Channel Descr. | RT     | Area     | % Area | Height  |
|---|--------------------------|--------|----------|--------|---------|
| 1 | PDA 250.0 nm             | 16.558 | 3957322  | 5.00   | 120007  |
| 2 | PDA 250.0 nm             | 18.641 | 75170557 | 95.00  | 1582665 |

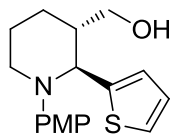

7u

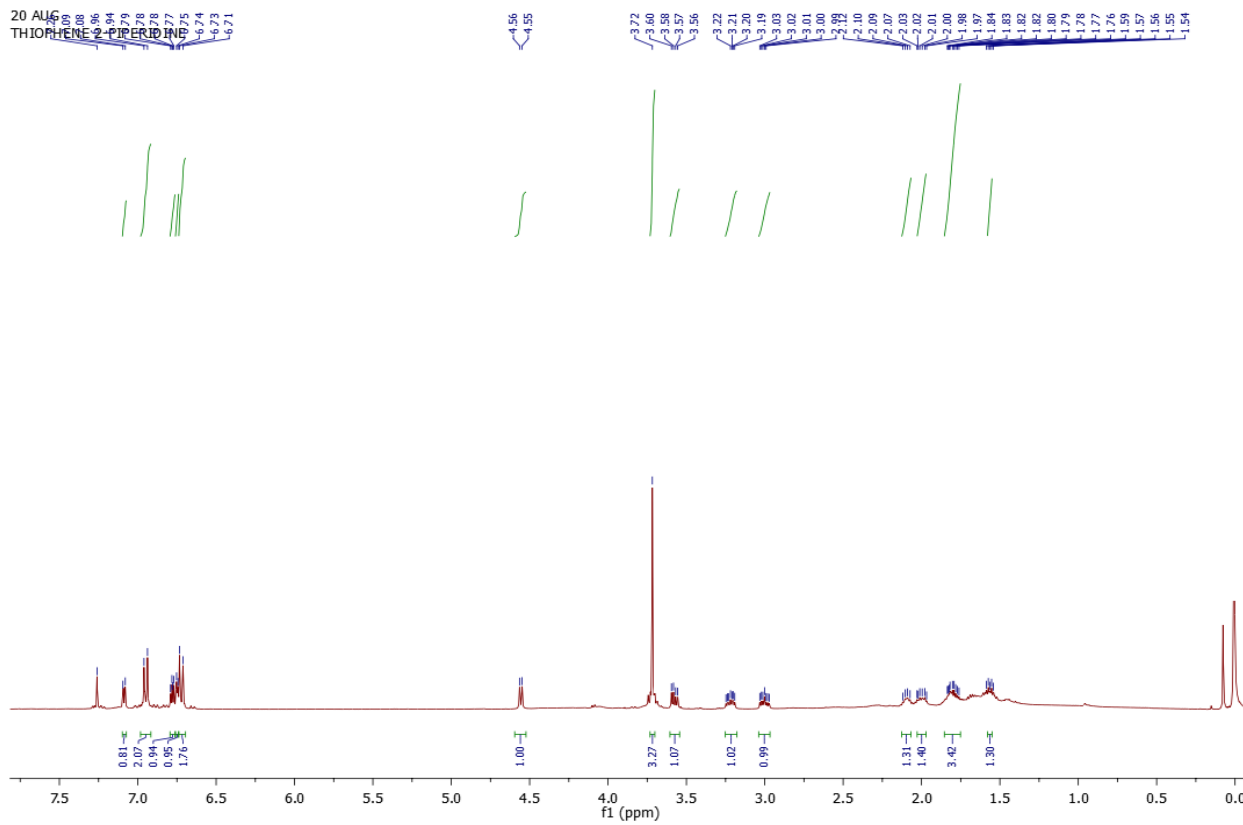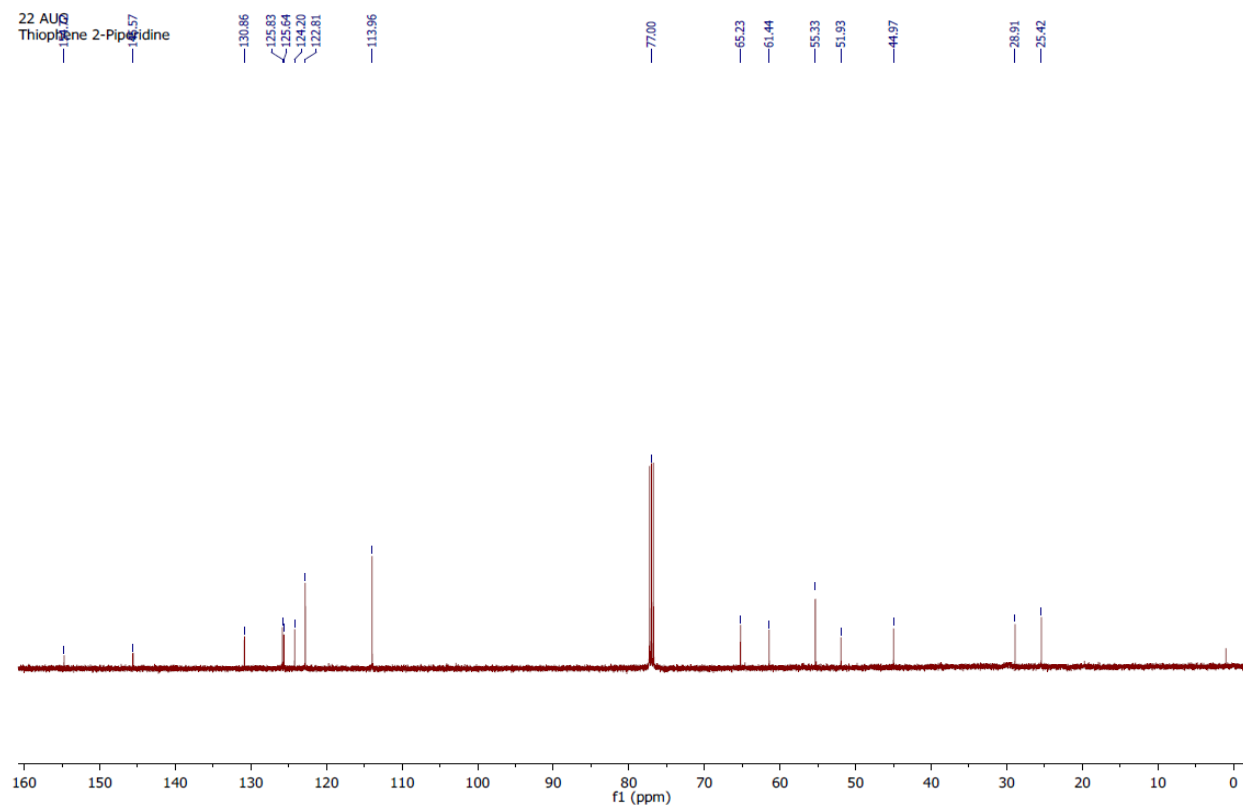

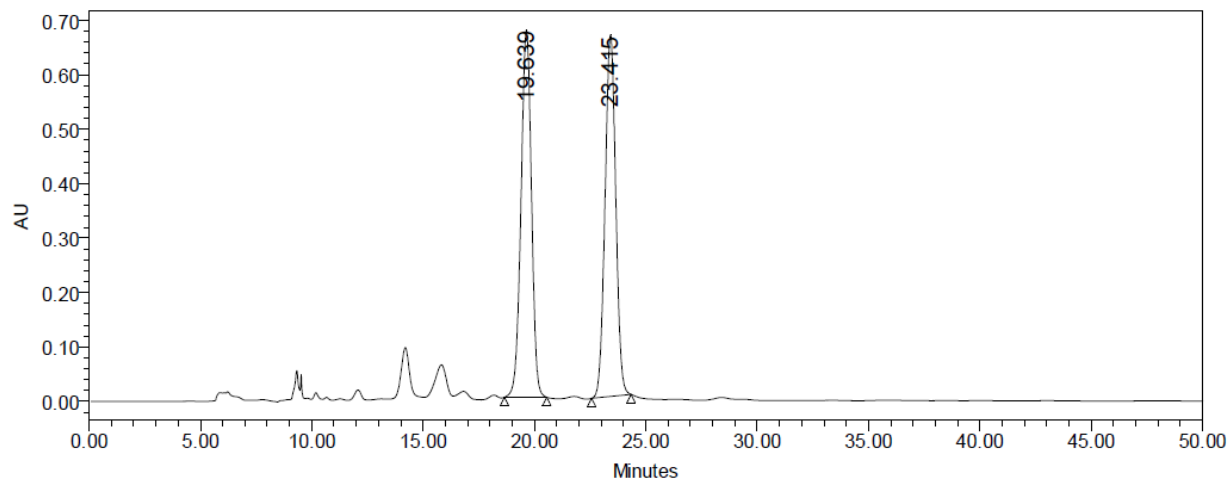

Channel: 2998; Processed Channel: PDA 240.0 nm; Result Id: 1480; Processing Method: Thiophene2 recemic

**Processed Channel Descr.: PDA 240.0 nm**

|   | Processed Channel Descr. | RT     | Area     | % Area | Height |
|---|--------------------------|--------|----------|--------|--------|
| 1 | PDA 240.0 nm             | 19.639 | 22050362 | 49.89  | 674714 |
| 2 | PDA 240.0 nm             | 23.415 | 22146167 | 50.11  | 663999 |

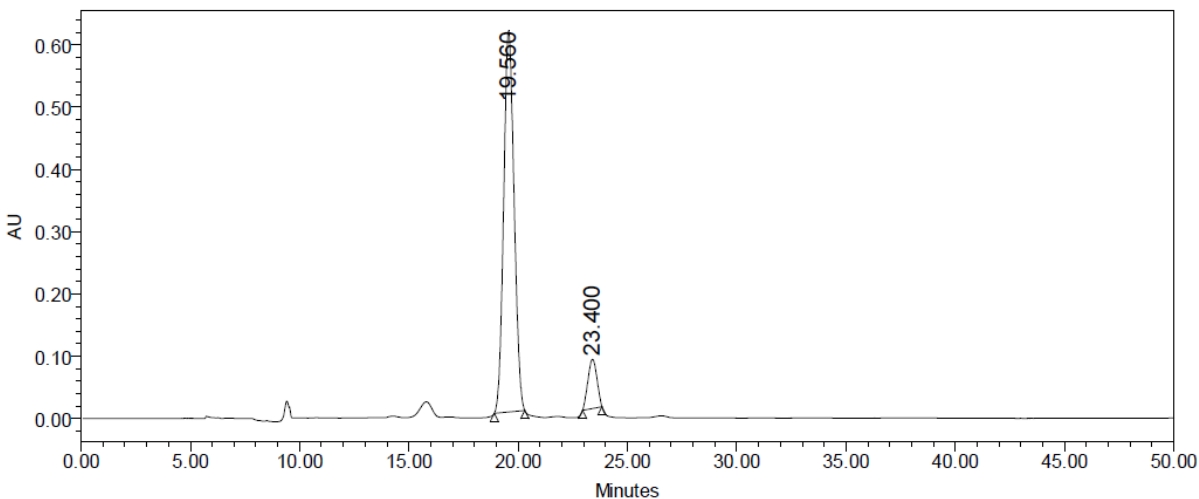

Channel: 2998; Processed Channel: PDA 300.0 nm; Result Id: 1486; Processing Method: Thiophene2 chirall

**Processed Channel Descr.: PDA 300.0 nm**

|   | Processed Channel Descr. | RT     | Area     | % Area | Height |
|---|--------------------------|--------|----------|--------|--------|
| 1 | PDA 300.0 nm             | 19.560 | 20244667 | 90.00  | 612321 |
| 2 | PDA 300.0 nm             | 23.400 | 2249588  | 10.00  | 79085  |



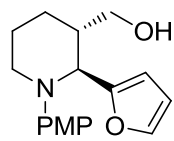

**7v**

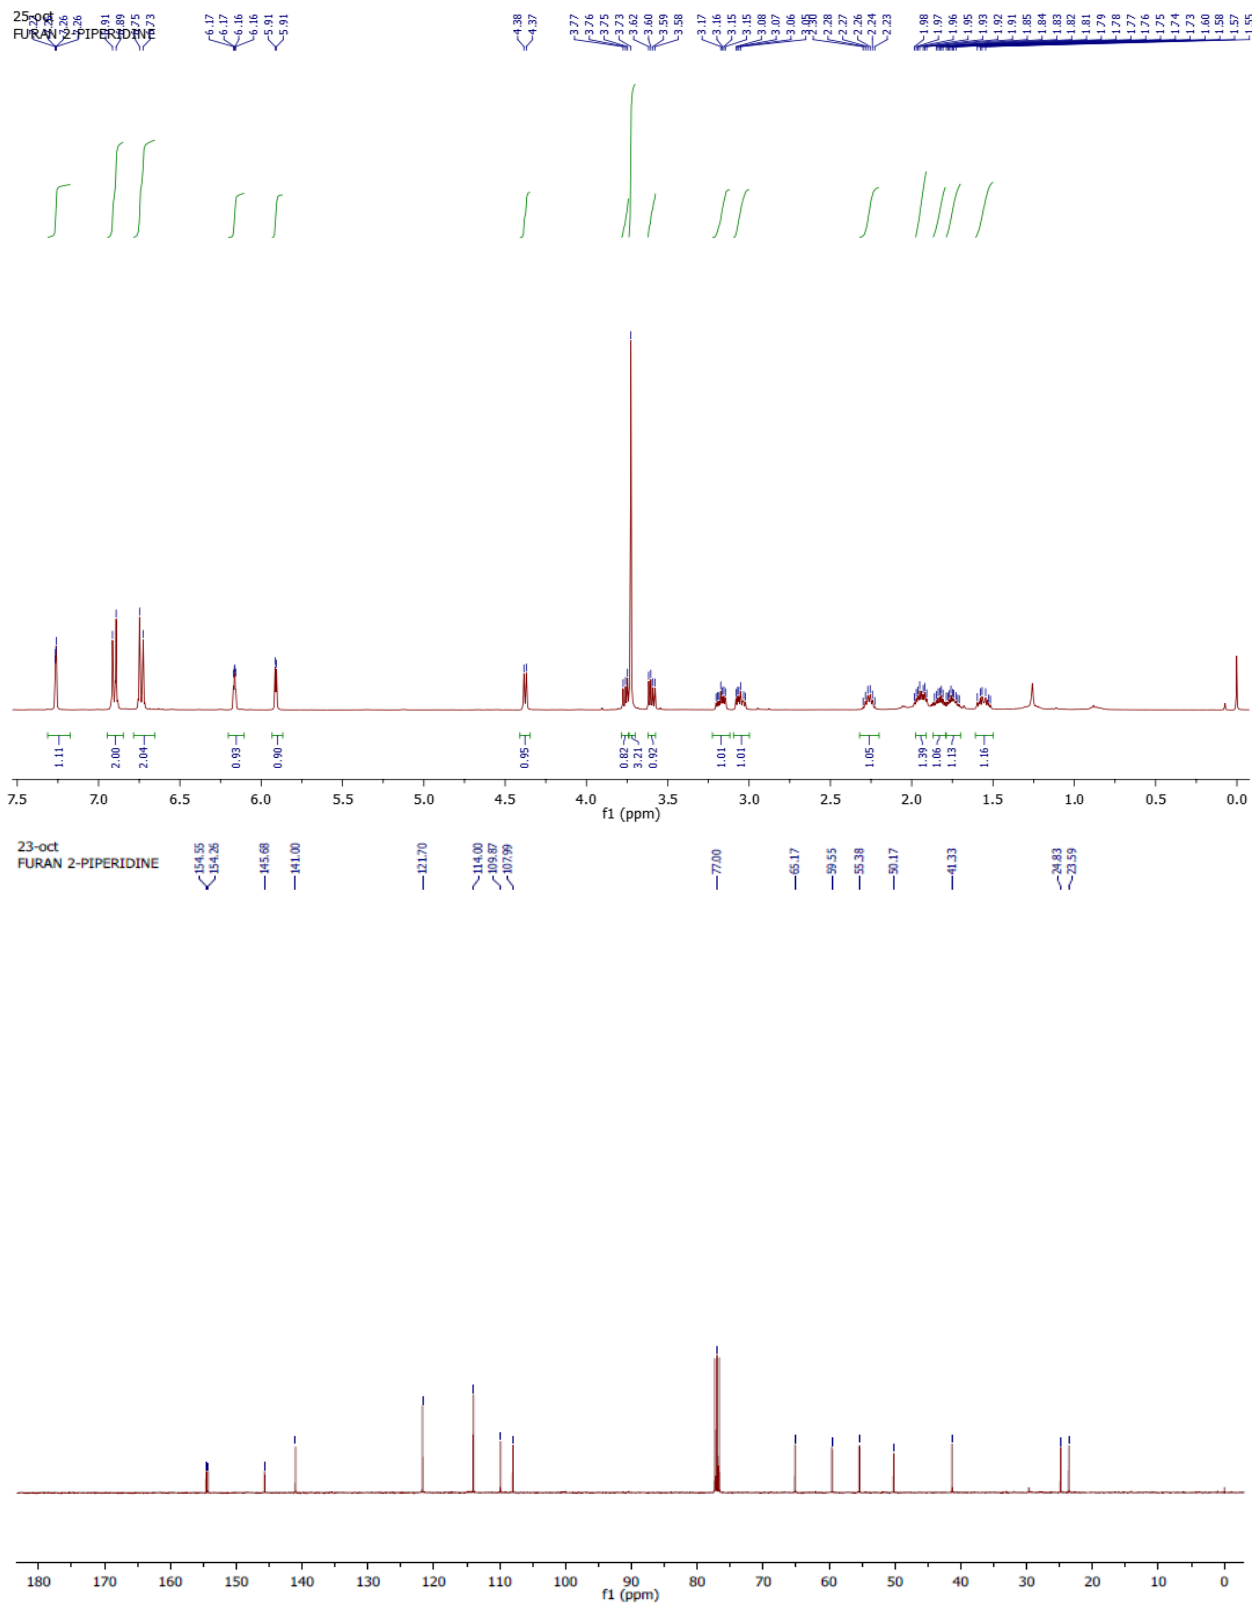

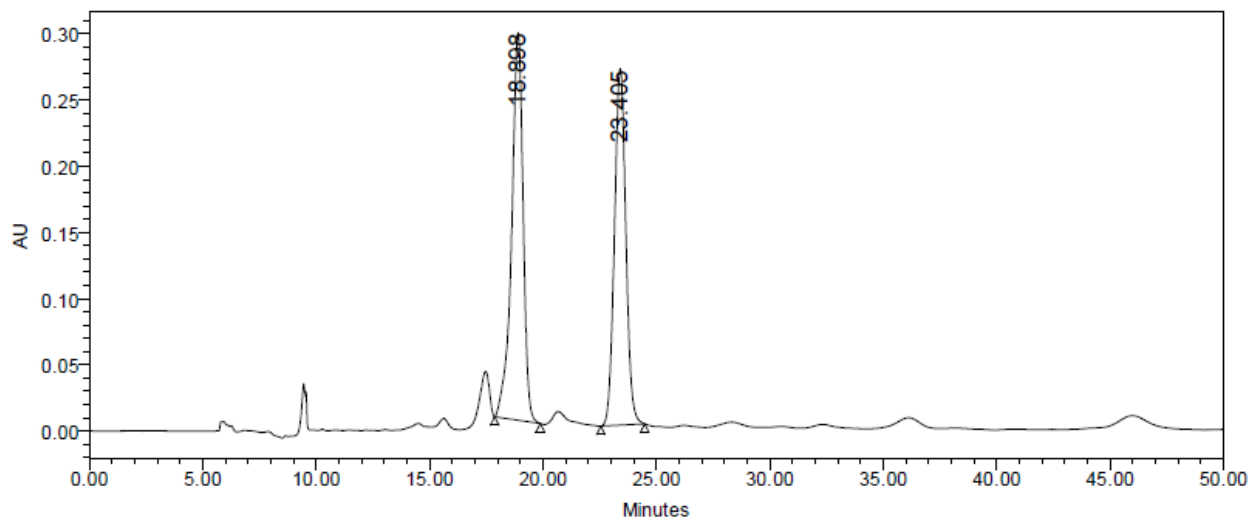

Channel: 2998; Processed Channel: PDA 250.0 nm; Result Id: 1413; Processing Method: furan 2 recemic

**Processed Channel Descr.: PDA 250.0 nm**

|   | Processed Channel Descr. | RT     | Area     | % Area | Height |
|---|--------------------------|--------|----------|--------|--------|
| 1 | PDA 250.0 nm             | 18.898 | 10325628 | 52.43  | 292953 |
| 2 | PDA 250.0 nm             | 23.405 | 9367580  | 47.57  | 269428 |

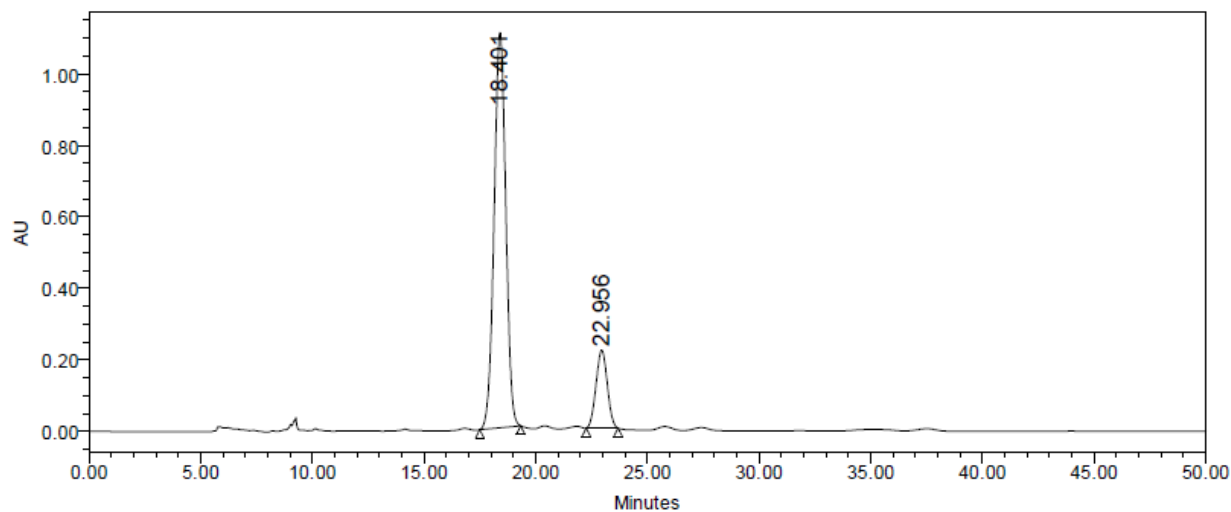

Channel: 2998; Processed Channel: PDA 240.0 nm; Result Id: 1415; Processing Method: furan2 chiral

**Processed Channel Descr.: PDA 240.0 nm**

|   | Processed Channel Descr. | RT     | Area     | % Area | Height  |
|---|--------------------------|--------|----------|--------|---------|
| 1 | PDA 240.0 nm             | 18.401 | 40034101 | 84.02  | 1104735 |
| 2 | PDA 240.0 nm             | 22.956 | 7613589  | 15.98  | 217824  |

**21.CINNAMYL PIPERIDINE:**

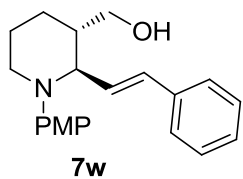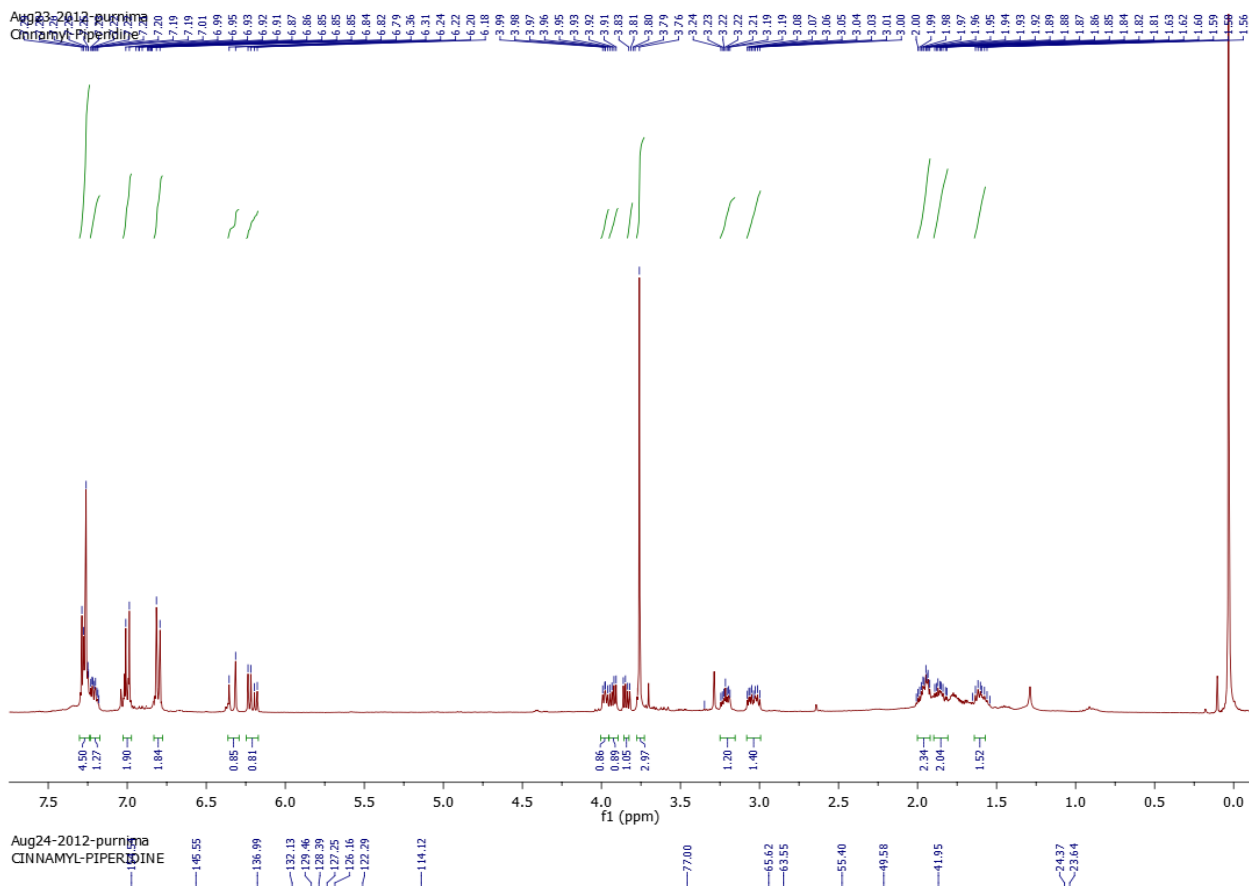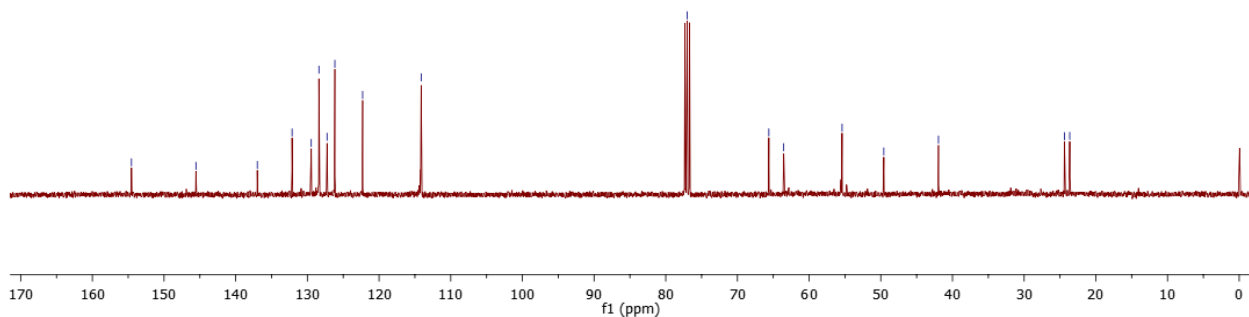

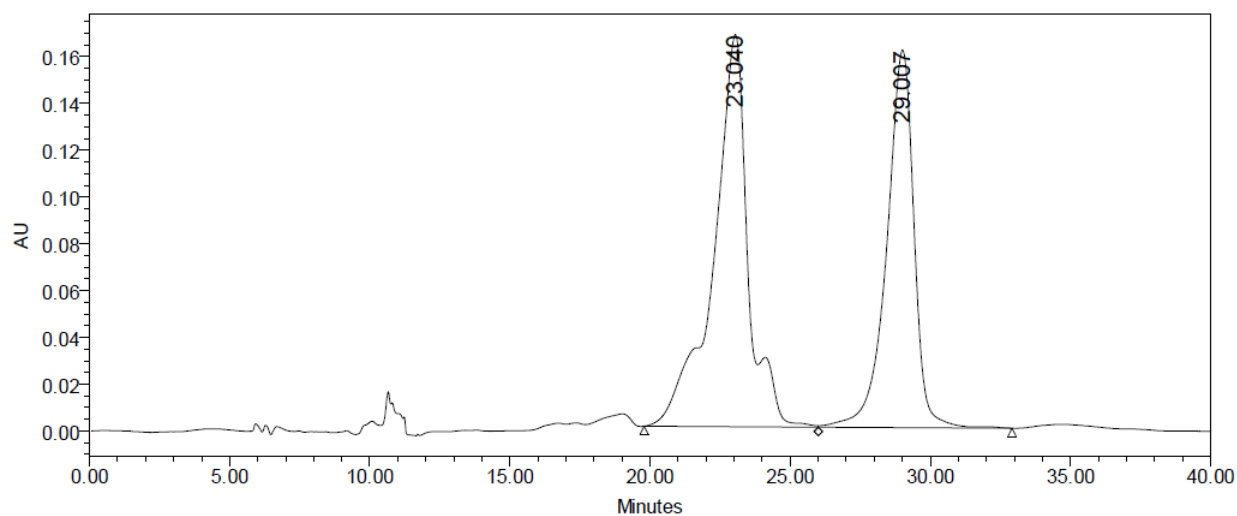

Channel: 2998; Processed Channel: PDA 250.0 nm; Result Id: 1838; Processing Method: cinnamyl recenic

**Processed Channel Descr.: PDA 250.0 nm**

|   | Processed Channel Descr. | RT     | Area     | % Area | Height |
|---|--------------------------|--------|----------|--------|--------|
| 1 | PDA 250.0 nm             | 23.040 | 14372094 | 56.73  | 167533 |
| 2 | PDA 250.0 nm             | 29.007 | 10961444 | 43.27  | 161324 |

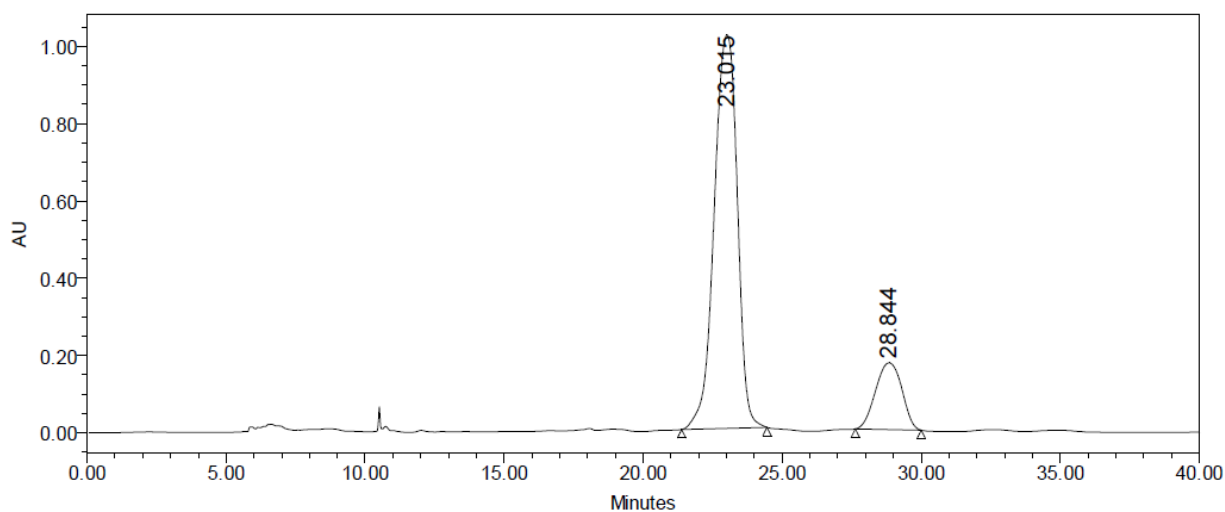

Channel: 2998; Processed Channel: PDA 250.0 nm; Result Id: 1840; Processing Method: cinnamyl chiral

**Processed Channel Descr.: PDA 250.0 nm**

|   | Processed Channel Descr. | RT     | Area     | % Area | Height  |
|---|--------------------------|--------|----------|--------|---------|
| 1 | PDA 250.0 nm             | 23.015 | 58908533 | 83.85  | 1018798 |
| 2 | PDA 250.0 nm             | 28.844 | 11350230 | 16.15  | 172832  |

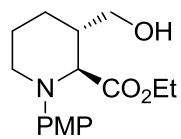

7x

Feb-07-2013, russan(H1)  
Glyoxylate-Piperidine

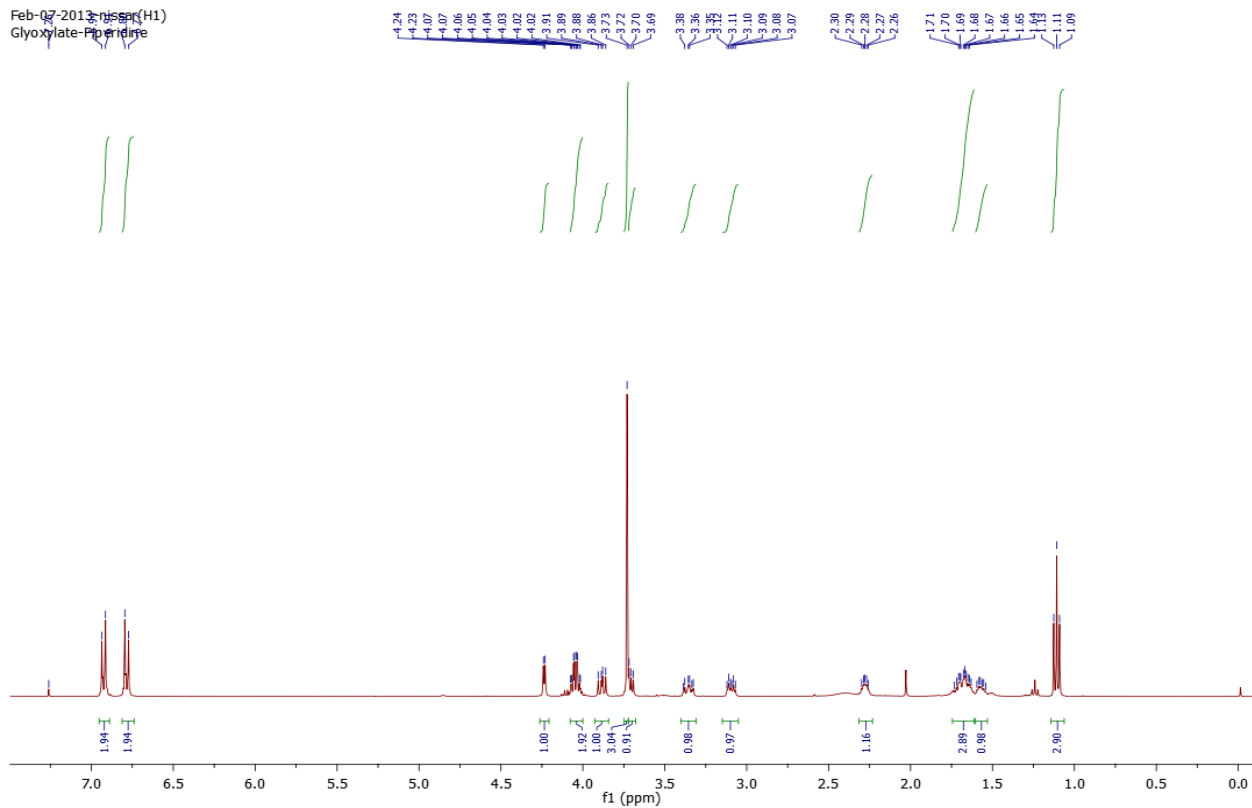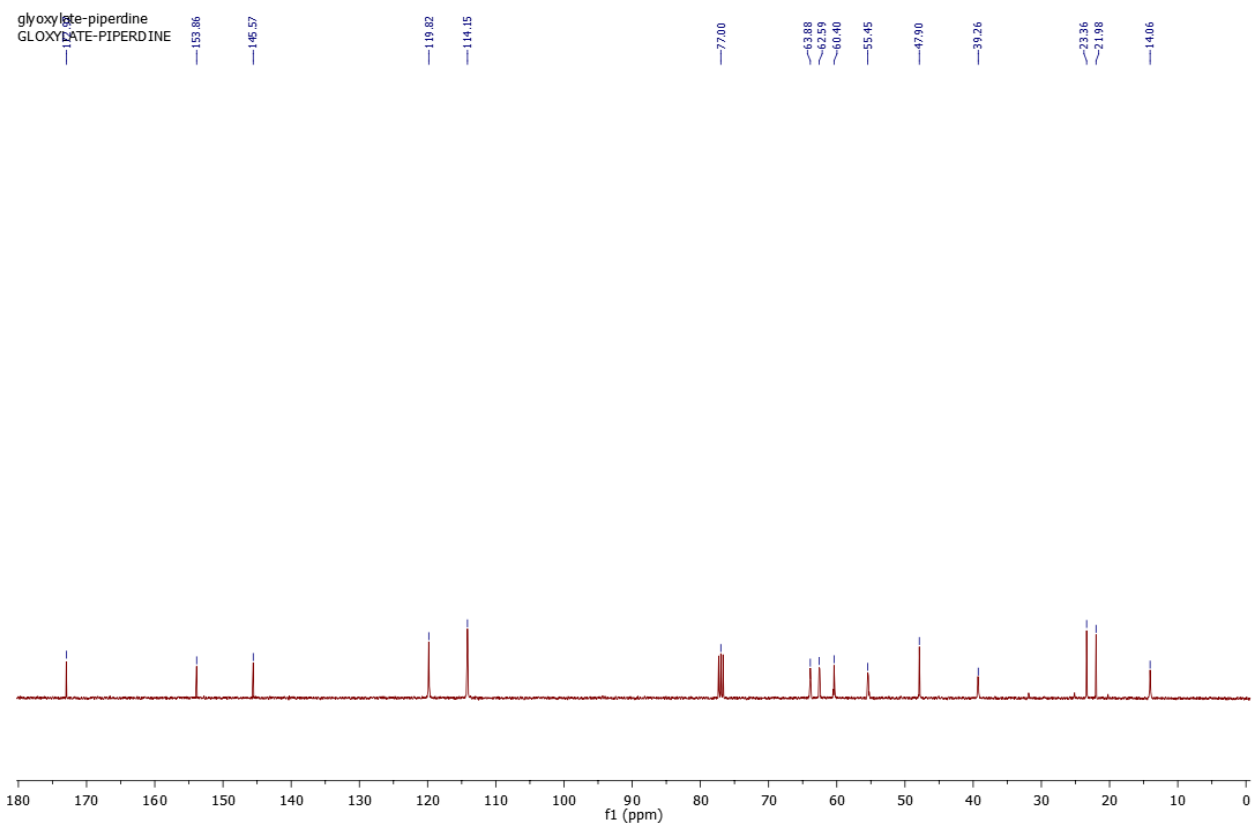

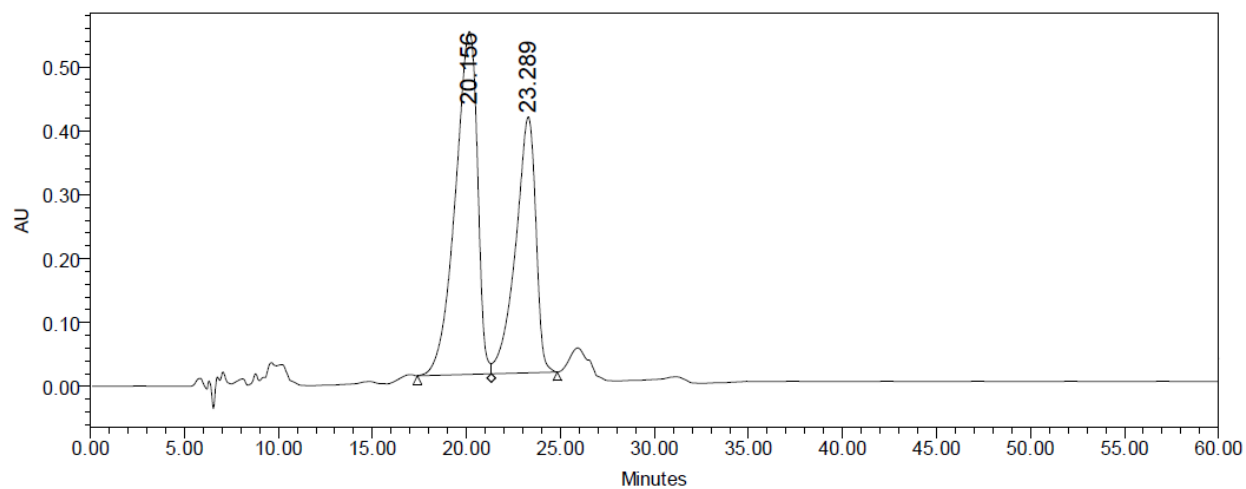

Channel: 2998; Processed Channel: PDA 250.0 nm; Result Id: 1084; Processing Method: glyoxylate pip racemic

**Processed Channel Descr.: PDA 250.0 nm**

|   | Processed Channel Descr. | RT     | Area     | % Area | Height |
|---|--------------------------|--------|----------|--------|--------|
| 1 | PDA 250.0 nm             | 20.156 | 43965044 | 59.51  | 536709 |
| 2 | PDA 250.0 nm             | 23.289 | 29917823 | 40.49  | 400721 |

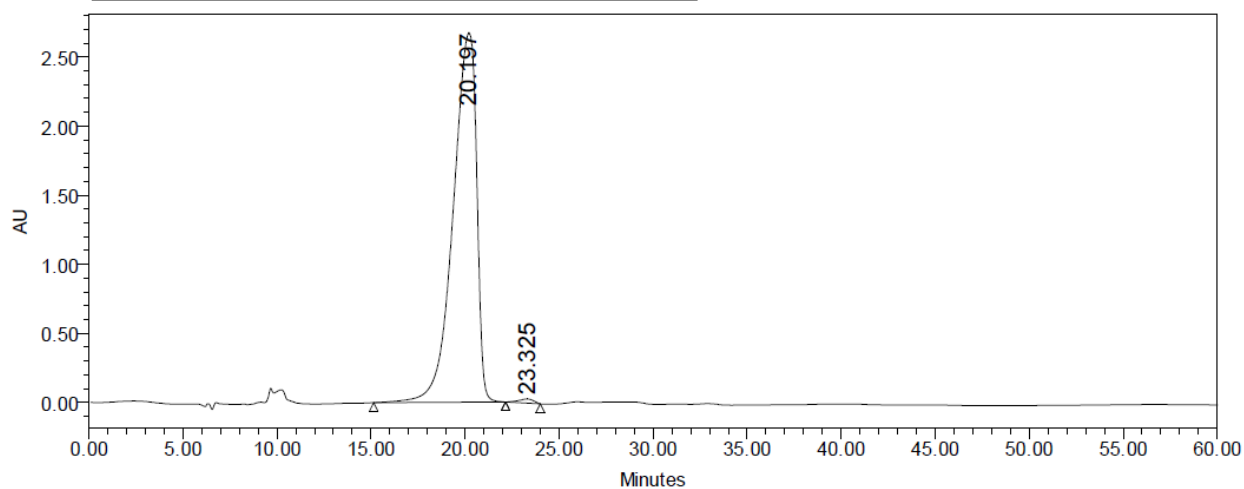

Channel: 2998; Processed Channel: PDA 250.0 nm; Result Id: 1081; Processing Method: glyoxylate pip chiral

**Processed Channel Descr.: PDA 250.0 nm**

|   | Processed Channel Descr. | RT     | Area      | % Area | Height  |
|---|--------------------------|--------|-----------|--------|---------|
| 1 | PDA 250.0 nm             | 20.197 | 231798737 | 99.32  | 2675270 |
| 2 | PDA 250.0 nm             | 23.325 | 1577481   | 0.68   | 28828   |

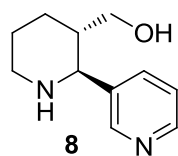

H1  
ANABASIN

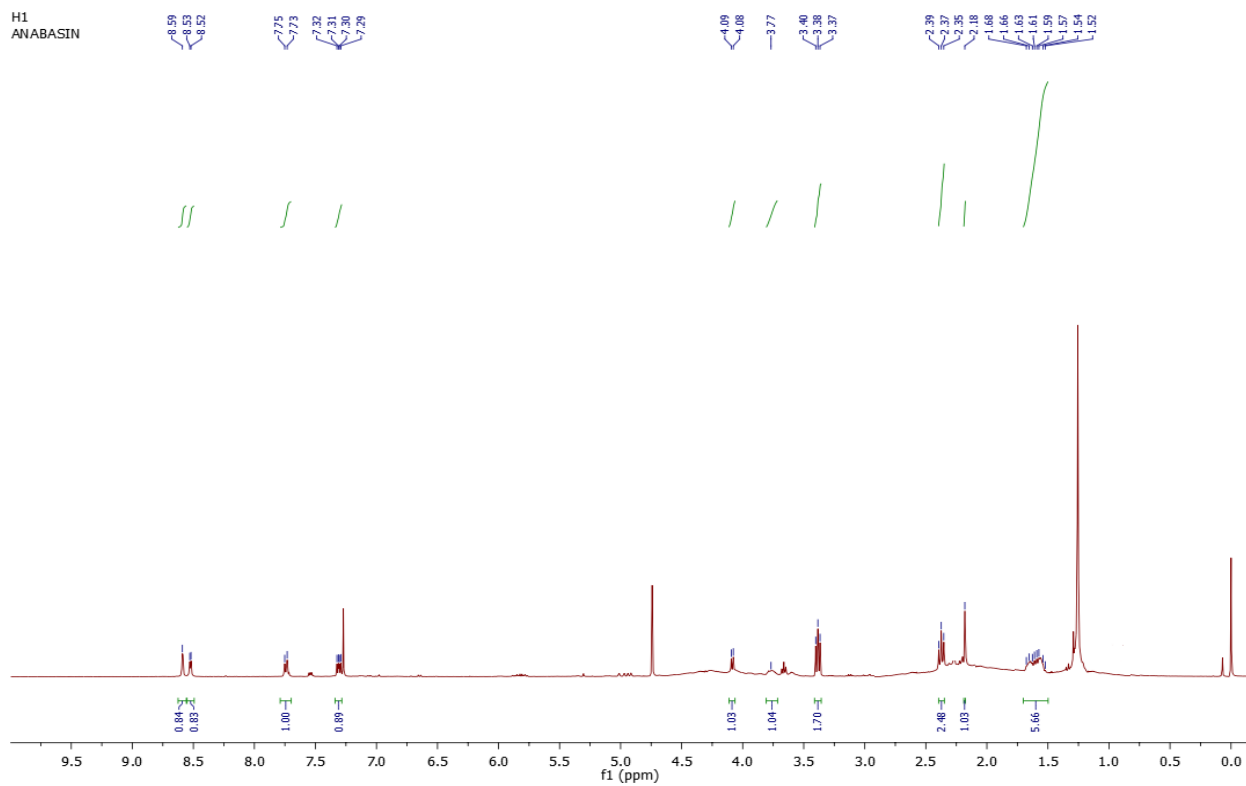

23-oct  
ANABASIN

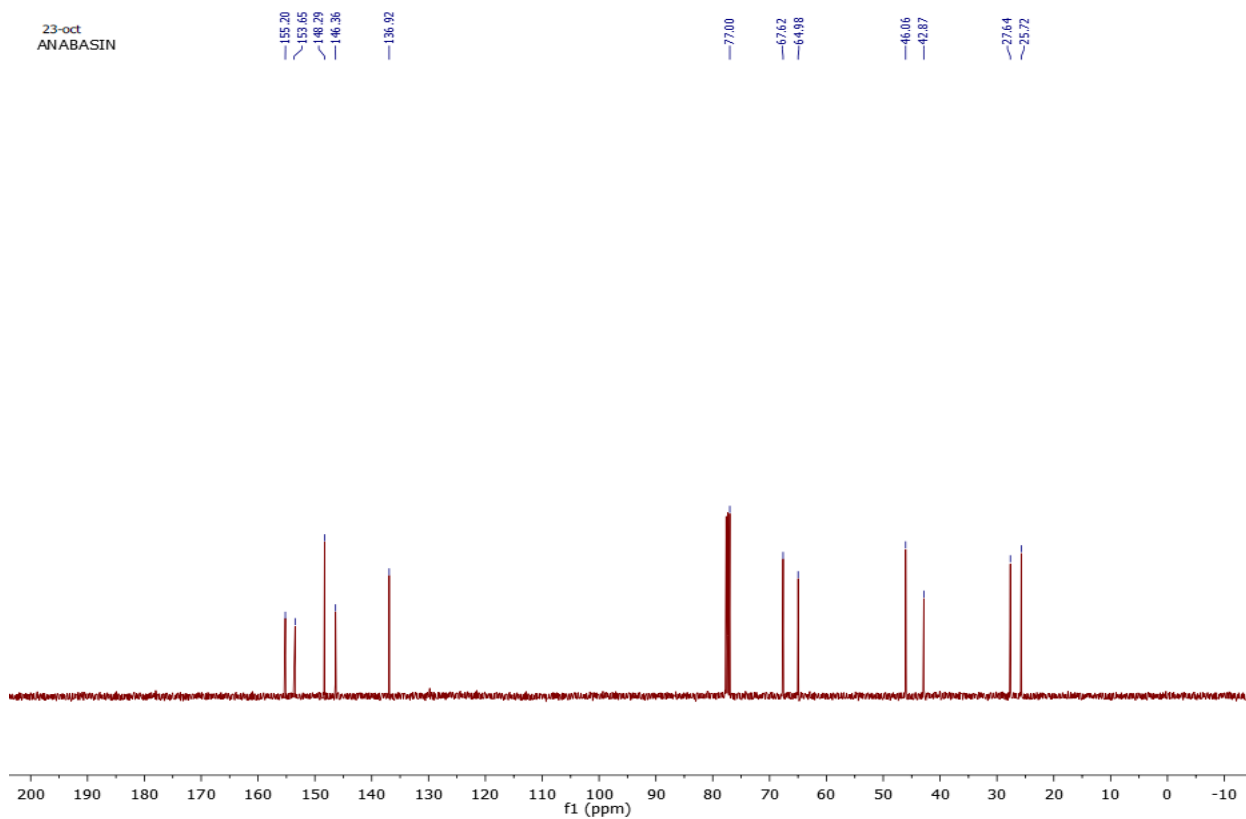

Crystal structure of ((2*S*, 3*S*)-1-(4-methoxyphenyl)-2-(pyridin-4-yl)piperidin-3-yl)methanol (**7t**):

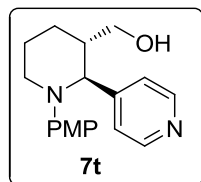

[CCDC - 930264 ]

The title compound, ((2*S*, 3*S*)-1-(4-methoxyphenyl)-2-(pyridin-4-yl)piperidin-3-yl)methanol, C<sub>18</sub>H<sub>22</sub>N<sub>2</sub>O<sub>2</sub>, crystallizes in the monoclinic space group P2<sub>1</sub> with the following unit-cell parameters: *a* = 9.1775(2), *b* = 10.7628(2), *c* = 16.9499(5) Å, β = 107.577(2)°, *Z* = 4. The asymmetric unit of the title compound contains two independent molecules. In one molecule, the benzene ring and an attached methoxy group were refined as disordered over two sets of sites in a 0.612(5):0.388(5) ratio. In the same molecule, methanol group is also disordered over two sets of sites in a 0.615(11):0.385(11) ratio. The crystal structure was solved by direct methods using single-crystal X-ray diffraction data collected at room temperature and refined by full-matrix least-squares procedures to a final *R*-value of 0.0526 for 4066 observed reflections.

X-ray intensity data of 46265 reflections (of which 45604 unique) were collected on *X'calibur* CCD area-detector diffractometer equipped with graphite monochromated MoKα radiation (λ = 0.71073 Å). The crystal used for data collection was of dimensions 0.30 x 0.20 x 0.20 mm. The cell dimensions were determined by least-squares fit of angular settings of 19712 reflections in the θ range 3.43 to 29.14°. The intensities were measured by ω scan mode for θ ranges 3.44 to 25.00°. 4066 reflections were treated as observed (*I* > 2σ(*I*)). Data were corrected for Lorentz, polarization and absorption factors. The structure was solved by direct methods using SHELXS97. All non-hydrogen atoms of the molecule were located in the best E-map. Full-matrix least-squares refinement was carried out using SHELXL97. The final refinement cycles converged to an *R* = 0.0526 and *wR* (*F*<sup>2</sup>) = 0.1239 for the observed data. Residual electron densities ranged from - 0.222 to 0.190 eÅ<sup>-3</sup>. Atomic scattering factors were taken from International Tables for X-ray Crystallography (1992, Vol. C, Tables 4.2.6.8 and 6.1.1.4). The crystallographic data are summarized in Table 1. CCDC - 930264 contains the supplementary crystallographic data for this paper.

**Table 1** Crystal and experimental data

|                   |                                                               |
|-------------------|---------------------------------------------------------------|
| CCDC No           | 930264                                                        |
| Empirical formula | C <sub>18</sub> H <sub>22</sub> N <sub>2</sub> O <sub>2</sub> |



|                                   |                                                                   |
|-----------------------------------|-------------------------------------------------------------------|
| Formula weight                    | 298.38                                                            |
| Temperature                       | 293(2) K                                                          |
| Wavelength                        | 0.71073 Å                                                         |
| Crystal system, space group       | Monoclinic, P2 <sub>1</sub>                                       |
| Unit cell dimensions :            | a= 9.1775(2), b= 10.7628(2), c= 16.9499(5) Å,<br>β = 107.577(2) ° |
| Volume                            | 1596.07(7) Å <sup>3</sup>                                         |
| Z, Calculated density             | 4, 1.242 Mg/m <sup>3</sup>                                        |
| Absorption coefficient            | 0.081 mm <sup>-1</sup>                                            |
| F(000)                            | 640                                                               |
| Crystal size                      | 0.30 x 0.20 x 0.20 mm                                             |
| Theta range for data collection   | 3.44 to 25.00 °                                                   |
| Limiting indices                  | -10 ≤ h ≤ 10, -12 ≤ k ≤ 12, -20 ≤ l ≤ 20                          |
| Reflections collected / unique    | 46265 / 5604 [R(int) = 0.0621]                                    |
| Completeness to theta = 25.00     | 99.7 %                                                            |
| Absorption correction             | Semi-empirical from equivalents                                   |
| Max. and min. transmission        | 1.00000 and 0.90642                                               |
| Refinement method                 | Full-matrix least-squares on F <sup>2</sup>                       |
| Data / restraints / parameters    | 5604 / 269 / 453                                                  |
| Goodness-of-fit on F <sup>2</sup> | 1.035                                                             |
| Final R indices [I > 2σ(I)]       | R1 = 0.0526, wR2 = 0.1239                                         |
| R indices (all data)              | R1 = 0.0799, wR2 = 0.1359                                         |
| Measurement                       | <i>X'calibur system – Oxford diffraction make, U.K.</i>           |

---

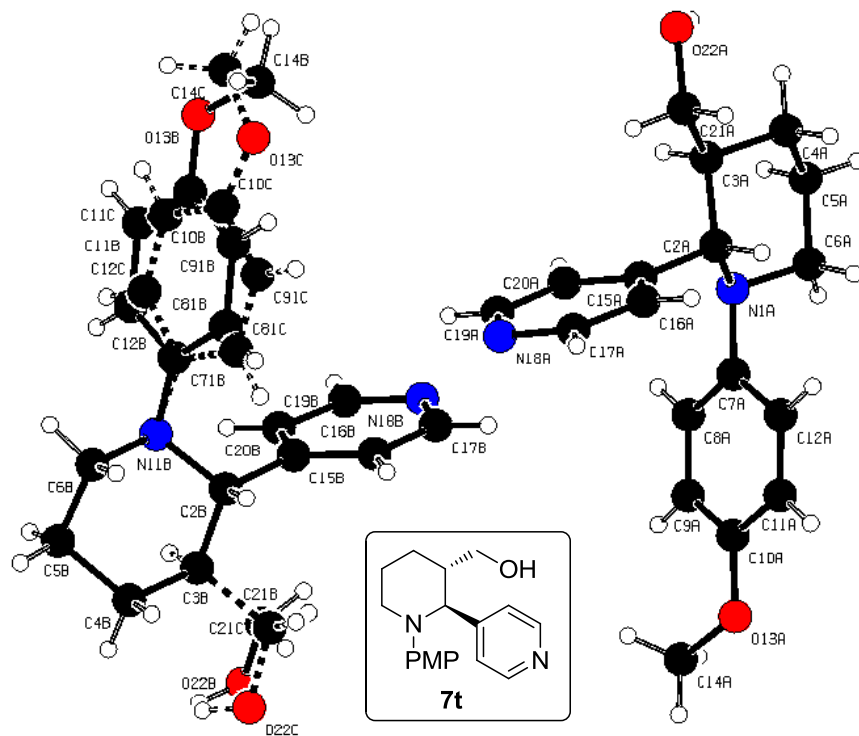

**Fig. 1:** ORTEP view of the molecule, showing the atom-labelling scheme. Displacement ellipsoids are drawn at the 50% probability level and H atoms are shown as small spheres of arbitrary radii.

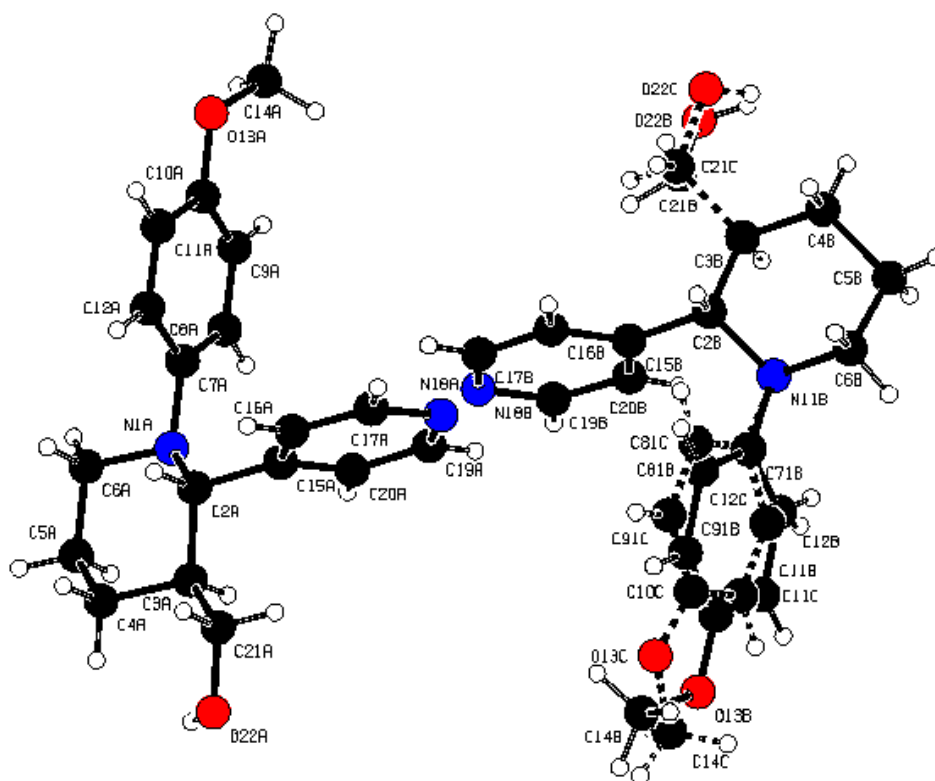

**Fig. 2:** A view of the molecular structure of (I), with the atomic numbering scheme.

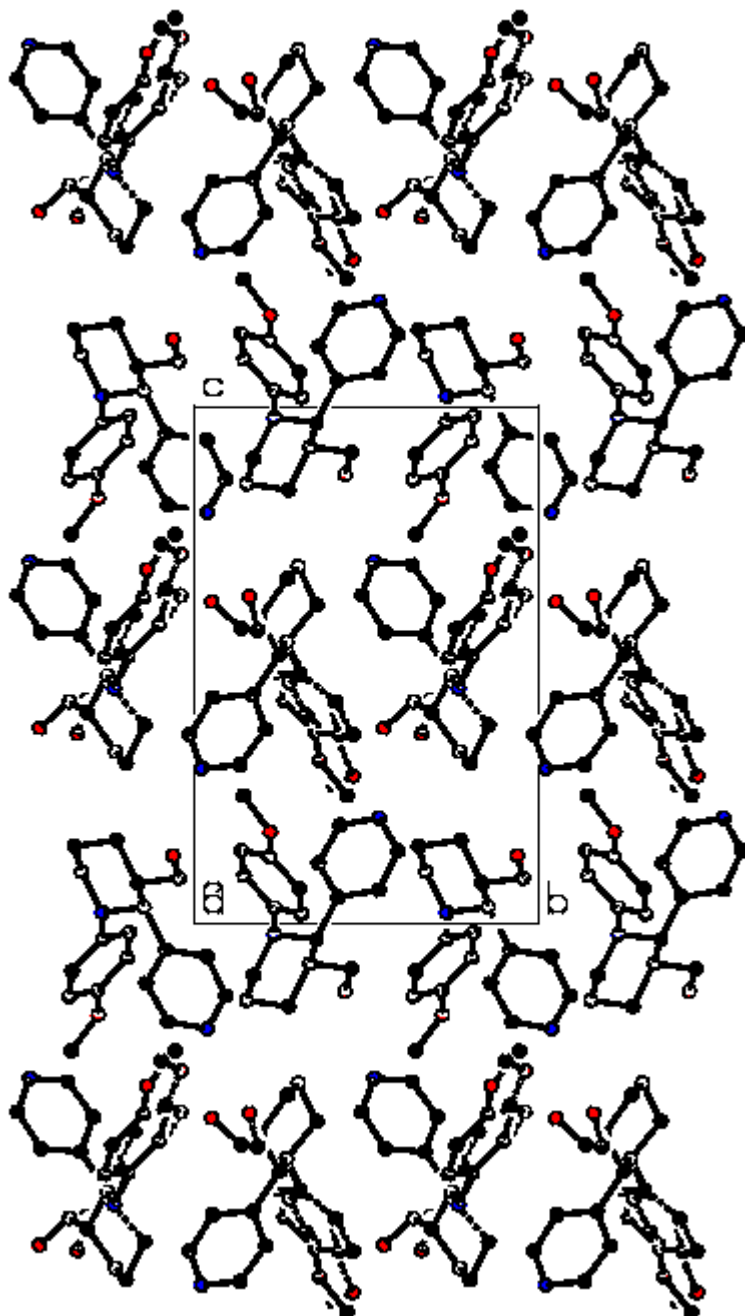

**Fig. 3:** The packing arrangement of molecules viewed down the a-axis.

CCDC- 930264 contains the supplementary crystallographic data for this paper. These data can be obtained free of charge from The Cambridge Crystallographic Data Centre via [www.ccdc.cam.ac.uk/data\\_request/cif](http://www.ccdc.cam.ac.uk/data_request/cif).
